# Supplementary material
Source: PubMed Central journal article supplement (PMC5337595)
Supplement: jcsm.13.3.479s1.pdf [file jcsm.13.3.479s1.pdf]

## **Literature Search Terms**

sleep apnea, sleep apnoea, OSA, sleep apnea syndromes, ambulatory, monitoring, polysomnography, snoring, otorhinolaryngologic surgical procedures, surgical procedures, surgery, snoring, obstructive sleep apnea, diagnosis, diagnostic, sleep-related breathing disorders, sleep-disordered breathing, portable, home, limited, unattended, non-laboratory, in-home, out of center, monitor, care service, test, testing, sleep study, screening, recording, device, diagnosed, diagnoses, PSG, polysomnogram, respiratory polygraphy, repeat, retest, retesting, home diagnostic test, multichannel recorder, multi-night, split-night, follow-up, two-night, multiple-night

## **MeSH Terms**

sleep apnea syndromes, sleep apnea obstructive, diagnosis, mass screening, probability, predictive value of tests, adult, ambulatory monitoring, polysomnography, follow-up studies, humans, snoring, otorhinolaryngologic surgical procedures, snoring/surgery, tongue/surgery, diagnostic techniques and procedures

## **Literature Search Limits**

January 1, 2005 to June 29, 2016; Human studies, RCTs or observational studies, adults, English language

## **Inclusion Criteria**

Diagnosis of OSA with PSG, HSAT, oximetry, or clinical prediction algorithm; address one of nine PICO questions, adults, outcomes related to accuracy, inconclusive results, complications, quality of life, medical outcomes, adherence, efficiency of diagnosis or access to care

## **Exclusion Criteria**

Treatment paper, no OSA, pediatric subjects, initial sample size > 25 per condition, 50 total for PICO 2, initial sample size > 10 per condition, 20 total for all other PICOs, wrong publication type (review, editorial, methodological, non-RCT or non-observational study), other sleep comorbidities besides OSA, hospitalized or general surgery, diagnostic test not in PICO question, time between HSAT and PSG > 4 weeks, HSAT used in-lab, HSAT used simultaneously with PSG in-lab, MSLT, MWT, and other nap tests performed

**Table S1—Summary of Downstream Consequences of OSA Diagnostic Outcomes**

**True Positive (TP)**

- Effective treatment and improved QOL
- Ineffective treatment and worsening of symptoms
- Increased costs due to treatment
- Time for treatment and follow-up
- Psychological distress
- Side-effects of therapy
- Improvement in comorbid conditions (e.g., hypertension)
- Reduced risk of CV events
- Reduced risk of post-CV events
- Reduced risk of motor vehicle accident (MVA)
- Reduced overall health costs

**True Negative (TN)**

- Confirmation of absence of OSA
- Possible repeat testing if patient deemed at high risk for OSA
- Psychological relief
- Consideration of alternative causes for symptoms
- Saves time and resources
- Focused treatment on true cause of symptoms

**False Positive (FP)**

- Unnecessary treatment and utilization of resources
- Increased costs due to treatment
- Time for treatment and follow-up
- Psychological distress
- Delay in diagnosis of true condition
- Side-effects of therapy

**False Negative (FN)**

- Absence of necessary treatment
- Reduced QOL
- Psychological distress
- Possible repeat testing if patient deemed at high risk for OSA
- Risk of motor vehicle accident (MVA)
- Risk of hypertension
- Risk of CV events
- Post-MI events
- Post-stroke events
- Death
- Increased costs and utilization of resources due to other condition(s)

# Diagnosis of obstructive sleep apnea in adults using clinical tools, questionnaires and predication algorithms

Figure S1—Berlin Questionnaire vs. PSG (AHI ≥ 5)

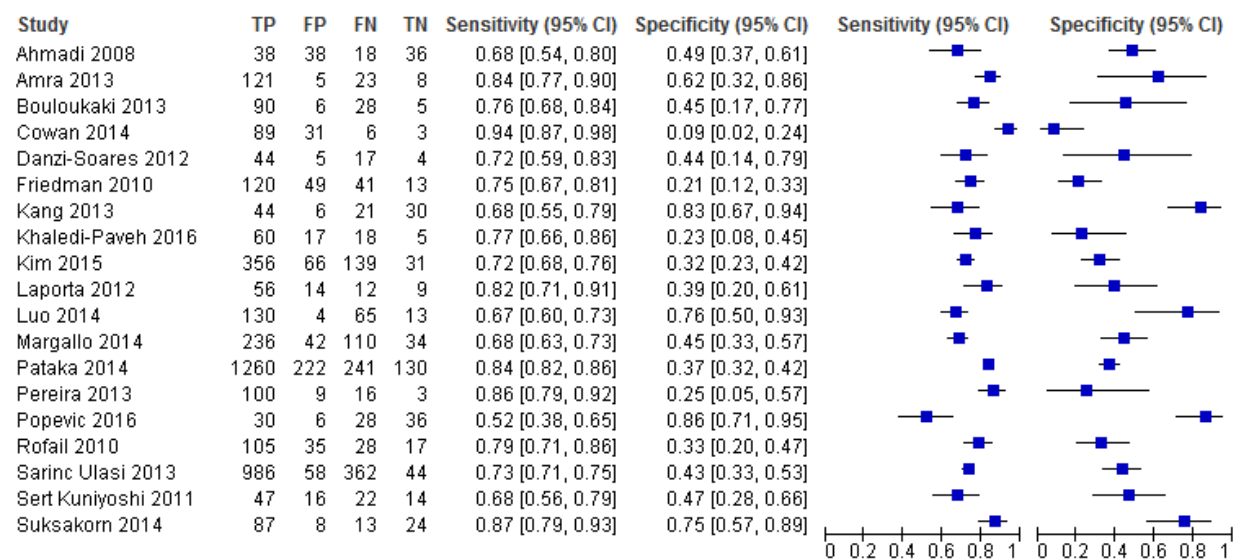

**Pooled sensitivity:** 0.76 [0.72, 0.80]

**Pooled specificity:** 0.45 [0.34, 0.56]

**LR+:** 1.38 [1.15, 1.66]

**LR-:** 0.53 [0.42, 0.65]

**DOR:** 2.63 [1.79, 3.86]

**Accuracy:** 0.70 or 70%

Figure S2—ROC Curve for Berlin Questionnaire vs. PSG (AHI  $\geq 5$ )

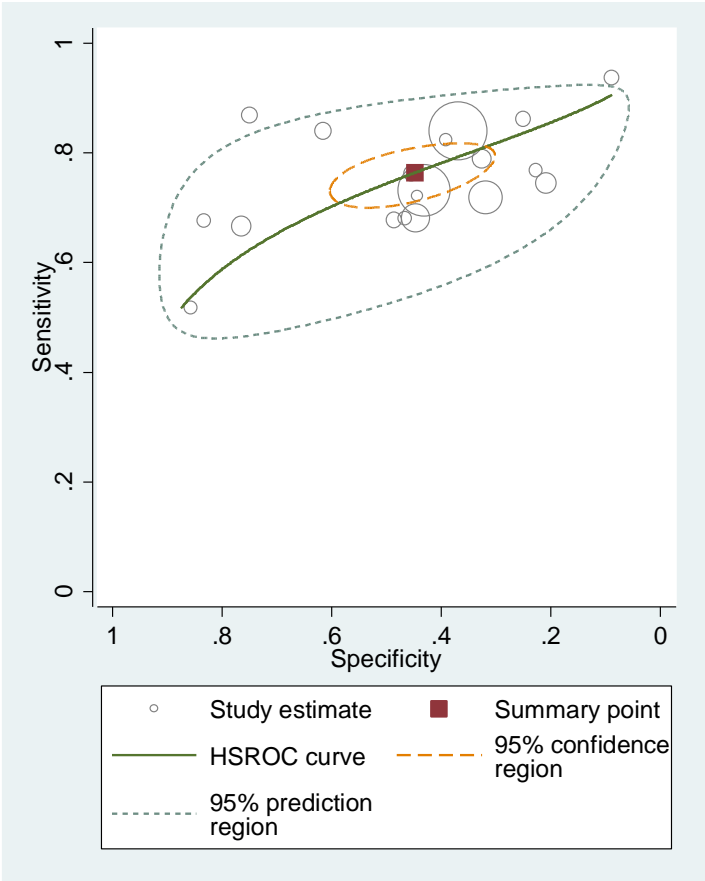

**Table S2—Summary of Findings table for Berlin Questionnaire vs. PSG to diagnose OSA in Suspected Adults (AHI ≥ 5)**

**References:** Ahmadi 2008 (A); Amra 2013 (B); Bouloukaki 2013 (C); Danzi-Soares 2012 (D); Friedman 2010 (E); Kang 2013 (F); Laporta 2012 (G); Pereira 2013 (H); Rofail 2010 (I); Sarinc Ulasi 2013 (J); Sert Kuniyoshi 2011 (K); Cowan 2014 (L); Khaledi-Paveh 2016 (M); Kim 2015 (N); Luo 2014 (O); Margallo 2014 (P); Pataka 2014 (Q); Popevic 2016 R; Suksakorn 2014 (S)

**Pooled sensitivity Berlin Questionnaire:** 0.76 (95% CI: 0.72 to 0.80) | **Pooled specificity Berlin Questionnaire:** 0.45 (95% CI: 0.34 to 0.56) | **Pooled sensitivity Attended PSG:** 1.00 (95% CI: 1.00 to 1.00) | **Pooled specificity Attended PSG:** 1.00 (95% CI: 1.00 to 1.00) | **Accuracy (high risk):** 72% (95% CI: 70 to 74%) | **Accuracy (low risk):** 62% (95% CI: 60 to 64%)

| Test result                                                                   | Quality of the Evidence (GRADE) | Number of results per 1000 patients tested (95% CI) |                  |                                             |                  | Number of participants (studies) |
|-------------------------------------------------------------------------------|---------------------------------|-----------------------------------------------------|------------------|---------------------------------------------|------------------|----------------------------------|
|                                                                               |                                 | Prevalence 87%                                      |                  | Prevalence 55%                              |                  |                                  |
|                                                                               |                                 | Berlin Questionnaire                                | Attended PSG     | Berlin Questionnaire                        | Attended PSG     |                                  |
| <b>True positives</b><br>(patients with OSA)                                  | ⊕⊕○○<br>LOW <sup>1,2</sup>      | 661 (626 to 696)                                    | 870 (870 to 870) | 418 (396 to 440)                            | 550 (550 to 550) | 6303<br>(19) <sup>A-S</sup>      |
|                                                                               |                                 | <b>209 fewer TP in Berlin Questionnaire</b>         |                  | <b>132 fewer TP in Berlin Questionnaire</b> |                  |                                  |
| <b>False negatives</b><br>(patients incorrectly classified as not having OSA) |                                 | 209 (174 to 244)                                    | 0 (0 to 0)       | 132 (110 to 154)                            | 0 (0 to 0)       |                                  |
|                                                                               |                                 | <b>209 more FN in Berlin Questionnaire</b>          |                  | <b>132 more FN in Berlin Questionnaire</b>  |                  |                                  |
| <b>True negatives</b><br>(patients without OSA)                               | ⊕⊕○○<br>LOW <sup>1,2</sup>      | 59 (44 to 73)                                       | 130 (130 to 130) | 202 (153 to 252)                            | 450 (450 to 450) | 6303<br>(19) <sup>A-S</sup>      |
|                                                                               |                                 | <b>71 fewer TN in Berlin Questionnaire</b>          |                  | <b>248 fewer TN in Berlin Questionnaire</b> |                  |                                  |
| <b>False positives</b><br>(patients incorrectly classified as having OSA)     |                                 | 71 (57 to 86)                                       | 0 (0 to 0)       | 248 (198 to 297)                            | 0 (0 to 0)       |                                  |
|                                                                               |                                 | <b>71 more FP in Berlin Questionnaire</b>           |                  | <b>248 more FP in Berlin Questionnaire</b>  |                  |                                  |

<sup>1</sup>Broad range of specificity across studies

<sup>2</sup>Wide confidence intervals

**Figure S3—Berlin Questionnaire vs. PSG (AHI ≥ 15)**

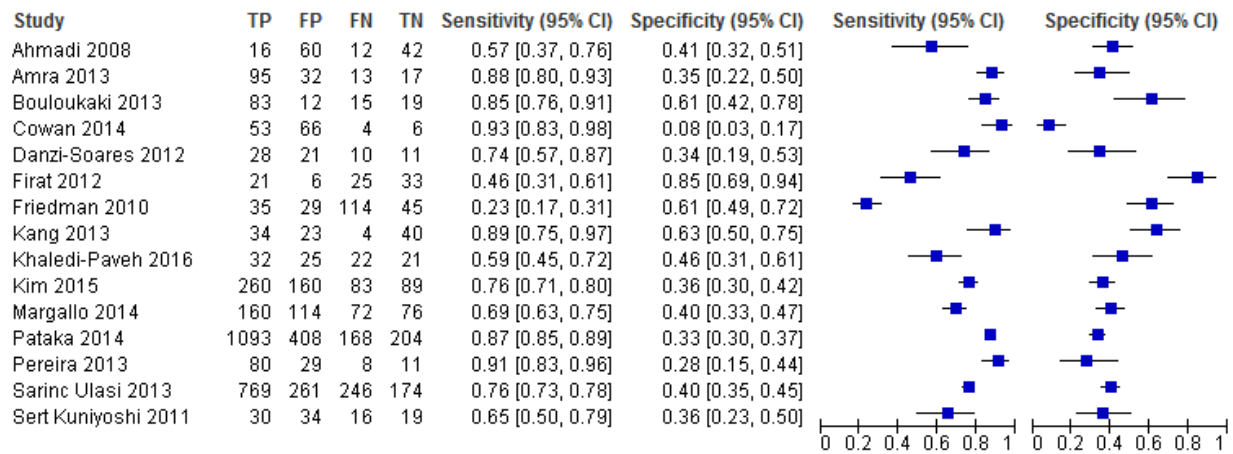

**Pooled sensitivity:** 0.75 [0.64, 0.83]

**Pooled specificity:** 0.42 [0.32, 0.52]

**LR+:** 1.29 [1.12, 1.48]

**LR-:** 0.60 [0.44, 0.81]

**DOR:** 2.16 [1.42, 3.27]

**Accuracy:** 0.63 or **63%**

Figure S4—ROC Curve for Berlin Questionnaire vs. PSG (AHI  $\geq 15$ )

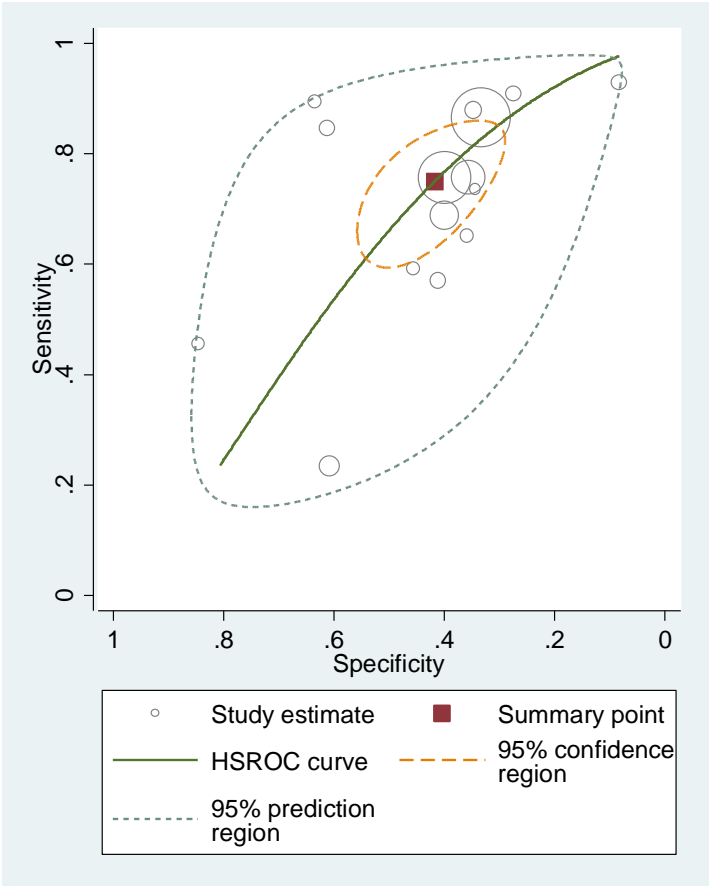

**Table S3—Summary of Findings table for Berlin Questionnaire vs. PSG to diagnose OSA in Suspected Adults (AHI ≥ 15)**

**References:** Ahmadi 2008 (A); Amra 2013 (B); Bouloukaki 2013 (C); Danzi-Soares 2012 (D); Friedman 2010 (E); Kang 2013 (F); Pereira 2013 (G); Sarinc Ulasi 2013 (H); Sert Kuniyoshi 2011 (I); Cowan 2014 (J); Khaledi-Paveh 2016 (K); Kim 2015 (L); Margallo 2014 (M); Pataka 2014 (N); Firat 2012 (O)

**Pooled sensitivity Berlin Questionnaire:** 0.75 (95% CI: 0.64 to 0.83) | **Pooled specificity Berlin Questionnaire:** 0.42 (95% CI: 0.32 to 0.52) | **Pooled sensitivity Attended PSG:** 1.00 (95% CI: 1.00 to 1.00) | **Pooled specificity Attended PSG:** 1.00 (95% CI: 1.00 to 1.00) | **Accuracy (high risk):** 63% (95% CI: 61 to 65%) | **Accuracy (low risk):** 50% (95% CI: 50 to 50%)

| Test result                                                                   | Quality of the Evidence (GRADE) | Number of results per 1000 patients tested (95% CI) |                  |                                             |                  | Number of participants (studies) |
|-------------------------------------------------------------------------------|---------------------------------|-----------------------------------------------------|------------------|---------------------------------------------|------------------|----------------------------------|
|                                                                               |                                 | Prevalence 64%                                      |                  | Prevalence 25%                              |                  |                                  |
|                                                                               |                                 | Berlin Questionnaire                                | Attended PSG     | Berlin Questionnaire                        | Attended PSG     |                                  |
| <b>True positives</b><br>(patients with OSA)                                  | ⊕⊕○○<br>LOW <sup>1,2</sup>      | 480 (410 to 531)                                    | 640 (640 to 640) | 188 (160 to 208)                            | 250 (250 to 250) | 5668 (15) <sup>A-O</sup>         |
|                                                                               |                                 | <b>160 fewer TP in Berlin Questionnaire</b>         |                  | <b>62 fewer TP in Berlin Questionnaire</b>  |                  |                                  |
| <b>False negatives</b><br>(patients incorrectly classified as not having OSA) |                                 | 160 (109 to 230)                                    | 0 (0 to 0)       | 62 (42 to 90)                               | 0 (0 to 0)       |                                  |
|                                                                               |                                 | <b>209 more FN in Berlin Questionnaire</b>          |                  | <b>62 more FN in Berlin Questionnaire</b>   |                  |                                  |
| <b>True negatives</b><br>(patients without OSA)                               | ⊕⊕○○<br>LOW <sup>1,2</sup>      | 151 (115 to 187)                                    | 360 (360 to 360) | 315 (240 to 390)                            | 750 (750 to 750) | 5668 (15) <sup>A-O</sup>         |
|                                                                               |                                 | <b>209 fewer TN in Berlin Questionnaire</b>         |                  | <b>435 fewer TN in Berlin Questionnaire</b> |                  |                                  |
| <b>False positives</b><br>(patients incorrectly classified as having OSA)     |                                 | 209 (173 to 245)                                    | 0 (0 to 0)       | 435 (360 to 510)                            | 0 (0 to 0)       |                                  |
|                                                                               |                                 | <b>209 more FP in Berlin Questionnaire</b>          |                  | <b>435 more FP in Berlin Questionnaire</b>  |                  |                                  |

<sup>1</sup>Broad range of specificity across studies

<sup>2</sup>Wide confidence intervals

**Figure S5—Berlin Questionnaire vs. PSG (AHI ≥ 30)**

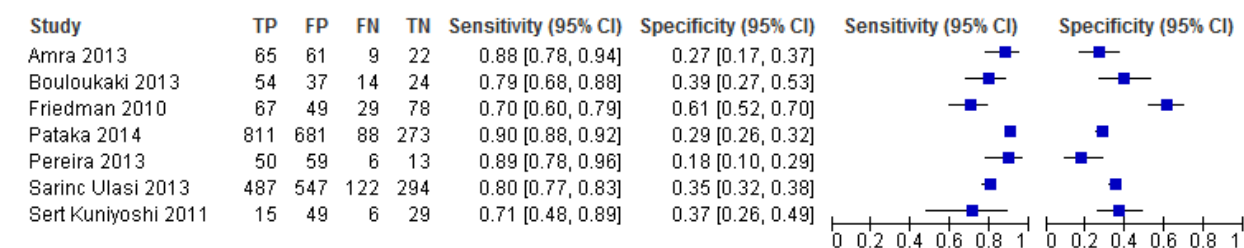

**Pooled sensitivity:** 0.84 [0.77, 0.89]

**Pooled specificity:** 0.35 [0.26, 0.44]

**DOR:** 2.73 [2.11, 3.52]

**LR+:** 1.28 [1.17, 1.41]

**LR-:** 0.47 [0.38, 0.58]

**Accuracy:** 0.56 or **56%**



Figure S6—ROC Curve for Berlin Questionnaire vs. PSG (AHI ≥ 30)

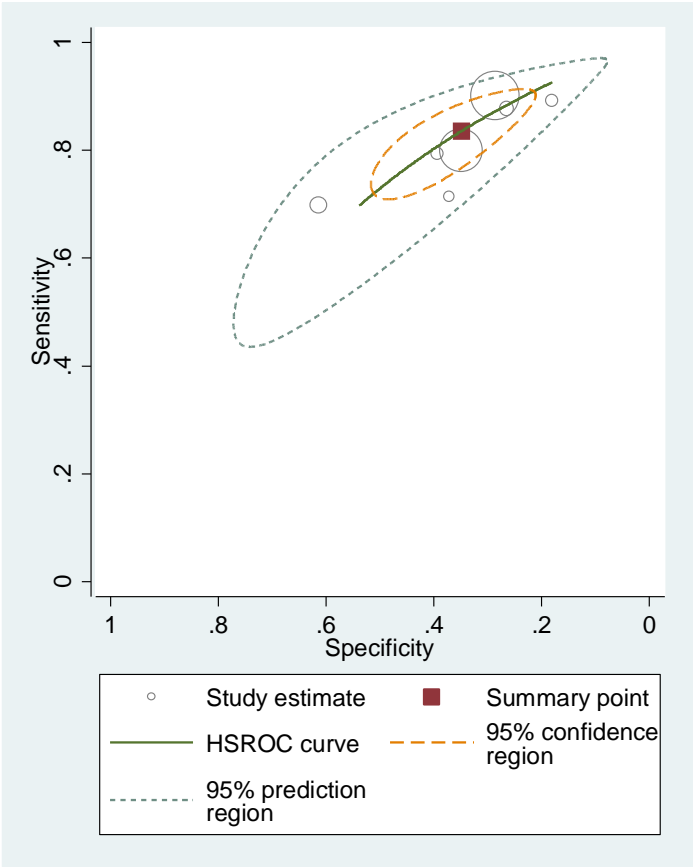

**Table S4—Summary of Findings table for Berlin Questionnaire vs. PSG to diagnose OSA in Suspected Adults (AHI ≥ 30)**

**References:** Amra 2013 (A); Bouloukaki 2013 (B); Friedman 2010 (C); Pereira 2013 (D); Sarinc Ulasi 2013 (E); Sert Kuniyoshi 2011 (F); Pataka 2014 (G)

**Pooled sensitivity Berlin Questionnaire:** 0.84 (95% CI: 0.77 to 0.89) | **Pooled specificity Berlin Questionnaire:** 0.35 (95% CI: 0.26 to 0.44) | **Pooled sensitivity Attended PSG:** 1.00 (95% CI: 1.00 to 1.00) | **Pooled specificity Attended PSG:** 1.00 (95% CI: 1.00 to 1.00) | **Accuracy (high risk):** 53% (95% CI: 52 to 53%) | **Accuracy (low risk):** 40% (95% CI: 38 to 42%)

| Test result                                                                   | Quality of the Evidence (GRADE) | Number of results per 1000 patients tested (95% CI) |                  |                                             |                  | Number of participants (studies) |
|-------------------------------------------------------------------------------|---------------------------------|-----------------------------------------------------|------------------|---------------------------------------------|------------------|----------------------------------|
|                                                                               |                                 | Prevalence 36%                                      |                  | Prevalence 10%                              |                  |                                  |
|                                                                               |                                 | Berlin Questionnaire                                | Attended PSG     | Berlin Questionnaire                        | Attended PSG     |                                  |
| <b>True positives</b><br>(patients with OSA)                                  |                                 | 302 (277 to 320)                                    | 360 (360 to 360) | 84 (77 to 89)                               | 100 (100 to 100) | 4039 (7) <sup>A-G</sup>          |
|                                                                               |                                 | <b>58 fewer TP in Berlin Questionnaire</b>          |                  | <b>16 fewer TP in Berlin Questionnaire</b>  |                  |                                  |
|                                                                               |                                 | 58 (40 to 83)                                       | 0 (0 to 0)       | 16 (11 to 23)                               | 0 (0 to 0)       |                                  |
|                                                                               |                                 | <b>58 more FN in Berlin Questionnaire</b>           |                  | <b>16 more FN in Berlin Questionnaire</b>   |                  |                                  |
| <b>False negatives</b><br>(patients incorrectly classified as not having OSA) |                                 | 224 (166 to 282)                                    | 640 (640 to 640) | 315 (234 to 396)                            | 900 (900 to 900) | 4039 (7) <sup>A-G</sup>          |
|                                                                               |                                 | <b>416 fewer TN in Berlin Questionnaire</b>         |                  | <b>585 fewer TN in Berlin Questionnaire</b> |                  |                                  |
|                                                                               |                                 | 416 (358 to 474)                                    | 0 (0 to 0)       | 585 (504 to 666)                            | 0 (0 to 0)       |                                  |
|                                                                               |                                 | <b>416 more FP in Berlin Questionnaire</b>          |                  | <b>585 more FP in Berlin Questionnaire</b>  |                  |                                  |

<sup>1</sup>Broad range of specificity across studies

<sup>2</sup>Wide confidence intervals

**Table S5—Summary of Findings table for Berlin Questionnaire vs. Home Sleep Apnea Test (HSAT) to diagnose OSA in Suspected Adults (AHI ≥ 5)**

References: Facco 2012 (A)

Single study sensitivity Berlin Questionnaire: 0.39 (95% CI: 0.22 to 0.59) | Single study specificity Berlin Questionnaire: 0.68 (95% CI: 0.56 to 0.78) | Single study sensitivity HSAT: 1.00 (95% CI: 1.00 to 1.00) | Single study specificity HSAT: 1.00 (95% CI: 1.00 to 1.00) Accuracy high risk: 43% (95% CI: 26 to 61%) Accuracy low risk: 52% (95% CI: 37 to 68%)

| Test result                                                                   | Quality of the Evidence (GRADE) | Number of results per 1000 patients tested (95% CI) |                  |                                             |                  | Number of participants (studies) |
|-------------------------------------------------------------------------------|---------------------------------|-----------------------------------------------------|------------------|---------------------------------------------|------------------|----------------------------------|
|                                                                               |                                 | Prevalence 87%                                      |                  | Prevalence 55%                              |                  |                                  |
|                                                                               |                                 | Berlin Questionnaire                                | HSAT             | Berlin Questionnaire                        | HSAT             |                                  |
| <b>True positives</b><br>(patients with OSA)                                  | ⊕⊕○○<br>LOW <sup>1,2</sup>      | 339 (191 to 513)                                    | 870 (870 to 870) | 215 (121 to 325)                            | 550 (550 to 550) | 100 (1) <sup>A</sup>             |
|                                                                               |                                 | <b>531 fewer TP in Berlin Questionnaire</b>         |                  | <b>335 fewer TP in Berlin Questionnaire</b> |                  |                                  |
|                                                                               |                                 | 531 (679 to 357)                                    | 0 (0 to 0)       | 335 (429 to 225)                            | 0 (0 to 0)       |                                  |
|                                                                               |                                 | <b>531 more FN in Berlin Questionnaire</b>          |                  | <b>335 more FN in Berlin Questionnaire</b>  |                  |                                  |
| <b>False negatives</b><br>(patients incorrectly classified as not having OSA) | ⊕⊕○○<br>LOW <sup>1,2</sup>      | 88 (73 to 101)                                      | 130 (130 to 130) | 306 (252 to 351)                            | 450 (450 to 450) | 100 (1) <sup>A</sup>             |
|                                                                               |                                 | <b>42 fewer TN in Berlin Questionnaire</b>          |                  | <b>144 fewer TN in Berlin Questionnaire</b> |                  |                                  |
|                                                                               |                                 | 42 (57 to 29)                                       | 0 (0 to 0)       | 144 (198 to 99)                             | 0 (0 to 0)       |                                  |
|                                                                               |                                 | <b>42 more FP in Berlin Questionnaire</b>           |                  | <b>144 more FP in Berlin Questionnaire</b>  |                  |                                  |

<sup>1</sup>Study consisted of pregnant women only

<sup>2</sup>Wide confidence interval for sensitivity and specificity

**Figure S7—Berlin Questionnaire vs. HSAT (AHI ≥ 15)**

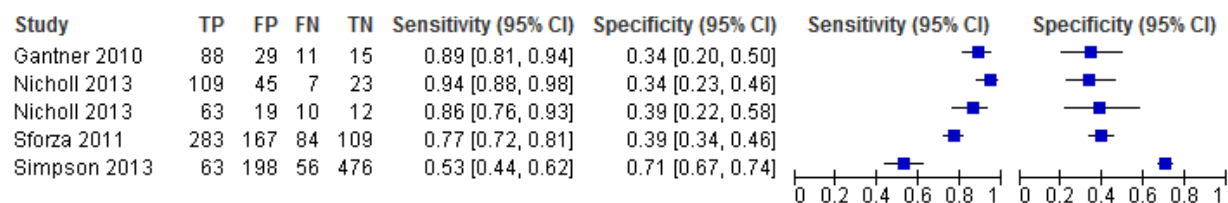

**Pooled sensitivity:** 0.76 [0.64, 0.85]

**Pooled specificity:** 0.44 [0.30, 0.58]

**LR+:** 1.36 [0.91, 2.02]

**LR-:** 0.54 [0.26, 1.20]

**DOR:** 2.31 [1.68, 2.42]

**Accuracy:** 0.67 or **67%**

**Table S6—Summary of Findings table for Berlin Questionnaire vs. HSAT to diagnose OSA in Suspected Adult (AHI ≥ 15)**

References: Gantner 2010 (A); Nicholl 2013 (B); Sforza 2011 (C); Simpson 2013 (D)

Pooled sensitivity Berlin Questionnaire: 0.76 (95% CI: 0.44 to 0.85) | Pooled specificity Berlin Questionnaire: 0.44 (95% CI: 0.30 to 0.58) | Pooled sensitivity Attended PSG: 1.00 (95% CI: 1.00 to 1.00) | Pooled specificity Attended PSG: 1.00 (95% CI: 1.00 to 1.00) | Accuracy (high risk): 53% (95% CI: 52 to 53%) | Accuracy (low risk): 40% (95% CI: 38 to 42%)

| Test result                                                                   | Quality of the Evidence (GRADE) | Number of results per 1000 patients tested (95% CI) |                  |                                             |                  | Number of participants (studies) |
|-------------------------------------------------------------------------------|---------------------------------|-----------------------------------------------------|------------------|---------------------------------------------|------------------|----------------------------------|
|                                                                               |                                 | Prevalence 64%                                      |                  | Prevalence 25%                              |                  |                                  |
|                                                                               |                                 | Berlin Questionnaire                                | HSAT             | Berlin Questionnaire                        | HSAT             |                                  |
| <b>True positives</b><br>(patients with OSA)                                  |                                 | 486 (282 to 544)                                    | 640 (640 to 640) | 190 (110 to 213)                            | 250 (250 to 250) | 1751 (4) <sup>A-D</sup>          |
|                                                                               |                                 | <b>154 fewer TP in Berlin Questionnaire</b>         |                  | <b>60 fewer TP in Berlin Questionnaire</b>  |                  |                                  |
|                                                                               |                                 | 154 (96 to 358)                                     | 0 (0 to 0)       | 60 (37 to 140)                              | 0 (0 to 0)       |                                  |
|                                                                               |                                 | <b>154 more FN in Berlin Questionnaire</b>          |                  | <b>60 more FN in Berlin Questionnaire</b>   |                  |                                  |
| <b>False negatives</b><br>(patients incorrectly classified as not having OSA) |                                 | 158 (108 to 209)                                    | 360 (360 to 360) | 330 (225 to 435)                            | 750 (750 to 750) | 1751 (4) <sup>A-D</sup>          |
|                                                                               |                                 | <b>202 fewer TN in Berlin Questionnaire</b>         |                  | <b>420 fewer TN in Berlin Questionnaire</b> |                  |                                  |
|                                                                               |                                 | 202 (151 to 252)                                    | 0 (0 to 0)       | 420 (315 to 525)                            | 0 (0 to 0)       |                                  |
|                                                                               |                                 | <b>202 more FP in Berlin Questionnaire</b>          |                  | <b>420 more FP in Berlin Questionnaire</b>  |                  |                                  |

<sup>1</sup>Broad range of specificity and sensitivity across studies

<sup>2</sup>Wide confidence intervals

**Table S7—Berlin Questionnaire vs. HSAT to diagnose OSA in Suspected Adults (AHI ≥ 30)**

References: Gantner 2010 (A); Nicoll 2013 (B)

Range of sensitivities Berlin Questionnaire: 0.76 to 0.92 | Range of specificities Berlin Questionnaire: 0.26 to 0.42  
 Range of sensitivities HSAT: 1.00 to 1.00 | Range of specificities HSAT: 1.00 to 1.00 Accuracy (high risk): 44% to 60%  
 Accuracy (low risk): 31% to 47%

| Test result                                                                   | Quality of the Evidence (GRADE)                                                                          | Number of results per 1000 patients tested (95% CI) |            |                                                          |            | Number of participants (studies) |
|-------------------------------------------------------------------------------|----------------------------------------------------------------------------------------------------------|-----------------------------------------------------|------------|----------------------------------------------------------|------------|----------------------------------|
|                                                                               |                                                                                                          | Prevalence 36%                                      |            | Prevalence 10%                                           |            |                                  |
|                                                                               |                                                                                                          | Berlin Questionnaire                                | HSAT       | Berlin Questionnaire                                     | HSAT       |                                  |
| <b>True positives</b><br>(patients with OSA)                                  | <br>LOW <sup>1,2</sup>  | 274 to 331                                          | 360 to 360 | 76 to 92                                                 | 100 to 100 | 315 (2) <sup>A,B</sup>           |
|                                                                               |                                                                                                          | <b>29 to 86 fewer TP in Berlin Questionnaire</b>    |            | <b>8 to 24 fewer TP in Berlin Questionnaire</b>          |            |                                  |
|                                                                               |                                                                                                          | 86 to 29                                            | 0 to 0     | 24 to 8                                                  | 0 to 0     |                                  |
|                                                                               |                                                                                                          | <b>29 to 86 more FN in Berlin Questionnaire</b>     |            | <b>8 to 24 more FN in Berlin Questionnaire</b>           |            |                                  |
| <b>False negatives</b><br>(patients incorrectly classified as not having OSA) | <br>LOW <sup>1,2</sup> | 166 to 269                                          | 640 to 640 | 234 to 378                                               | 900 to 900 | 315 (2) <sup>A,B</sup>           |
|                                                                               |                                                                                                          | <b>371 to 474 fewer TN in Berlin Questionnaire</b>  |            | <b>666 fewer to 522 fewer TN in Berlin Questionnaire</b> |            |                                  |
|                                                                               |                                                                                                          | 371 to 474                                          | 0 to 0     | 522 to 666                                               | 0 to 0     |                                  |
|                                                                               |                                                                                                          | <b>371 to 474 fewer TP in Berlin Questionnaire</b>  |            | <b>522 to 666 fewer TP in Berlin Questionnaire</b>       |            |                                  |

<sup>1</sup>Indirect evidence as Berlin Questionnaire was not compared against HSAT in any of the PICO questions

<sup>2</sup>Wide range of sensitivity and specificity across studies

**Table S8—Summary of Findings table for ESS vs. PSG to diagnose OSA in Suspected Adults (AHI ≥ 5)**

**References:** Chen 2011 (A); Danzi-Soares (B); Zou 2013 (C); Sarinc Ulasli 2013 (D); Pataka 2014 (E); Luo 2014 (F)

Range of sensitivities Epworth Sleepiness Scale: 0.27 to 0.72 | Range of specificities Epworth Sleepiness Scale: 0.50 to 0.76 | Range of sensitivities Attended PSG: 1.00 to 1.00 | Range of specificities Attended PSG: 1.00 to 1.00 | **Accuracy (high risk):** (51% to 52%) | **Accuracy (low risk):** (54% to 59%)

| Test result                                                                   | Quality of the Evidence (GRADE) | Number of results per 1000 patients tested (95% CI) |              |                                   |              | Number of participants (studies) |
|-------------------------------------------------------------------------------|---------------------------------|-----------------------------------------------------|--------------|-----------------------------------|--------------|----------------------------------|
|                                                                               |                                 | Prevalence 87%                                      |              | Prevalence 55%                    |              |                                  |
|                                                                               |                                 | ESS                                                 | Attended PSG | ESS                               | Attended PSG |                                  |
| <b>True positives</b><br>(patients with OSA)                                  | ⊕⊕○○<br>LOW <sup>1,2</sup>      | 235 to 626                                          | 870 to 870   | 149 to 396                        | 550 to 550   | 4724 <sup>A-F</sup><br>(6)       |
| <b>False negatives</b><br>(patients incorrectly classified as not having OSA) |                                 | <b>244 to 635 fewer TP in ESS</b>                   |              | <b>154 to 401 fewer TP in ESS</b> |              |                                  |
|                                                                               |                                 | 244 to 635                                          | 0 to 0       | 154 to 401                        | 0 to 0       |                                  |
|                                                                               |                                 | <b>244 to 635 more FN in ESS</b>                    |              | <b>154 to 401 more FN in ESS</b>  |              |                                  |
| <b>True negatives</b><br>(patients without OSA)                               | ⊕⊕○○<br>LOW <sup>1,2</sup>      | 65 to 99                                            | 130 to 130   | 225 to 342                        | 450 to 450   | 4724 <sup>A-F</sup><br>(6)       |
| <b>False positives</b><br>(patients incorrectly classified as having OSA)     |                                 | <b>31 to 65 fewer TN in ESS</b>                     |              | <b>108 to 225 fewer TN in ESS</b> |              |                                  |
|                                                                               |                                 | 31 to 65                                            | 0 to 0       | 108 to 225                        | 0 to 0       |                                  |
|                                                                               |                                 | <b>31 to 65 more FP in ESS</b>                      |              | <b>108 to 225 more FP in ESS</b>  |              |                                  |

<sup>1</sup>Wide range of values for sensitivity and specificity across studies

<sup>2</sup>Wide confidence intervals for sensitivity and specificity

**Table S9—Summary of Findings table for ESS vs. PSG to diagnose OSA in Suspected Adults (AHI ≥ 15)**

References: Danzi-Soares (A); Subramanian 2011 (B); Ulasli 2014 (C); Pataka 2014 (D); Luo 2014 (E)

Range of sensitivities ESS: 0.21 to 0.58 | Range of specificities ESS: 0.50 to 0.72 Range of sensitivities Attended PSG: 1.00 to 1.00 | Range of specificities Attended PSG: 1.00 to 1.00 Accuracy (high risk): 46% to 48% Accuracy (low risk): 54% to 58%

| Test result                                                                   | Quality of the Evidence (GRADE)  | Number of results per 1000 patients tested (95% CI) |                                  |                                   |              | Number of participants (studies) |
|-------------------------------------------------------------------------------|----------------------------------|-----------------------------------------------------|----------------------------------|-----------------------------------|--------------|----------------------------------|
|                                                                               |                                  | Prevalence 64%                                      |                                  | Prevalence 25%                    |              |                                  |
|                                                                               |                                  | ESS                                                 | Attended PSG                     | ESS                               | Attended PSG |                                  |
| <b>True positives</b><br>(patients with OSA)                                  | ⊕⊕○○<br>LOW <sup>1,2</sup>       | 134 to 371                                          | 640 to 640                       | 53 to 143                         | 250 to 250   | 4093<br>(5) <sup>A-E</sup>       |
| <b>False negatives</b><br>(patients incorrectly classified as not having OSA) |                                  | <b>269 to 506 fewer TP in ESS</b>                   |                                  | <b>105 to 197 fewer TP in ESS</b> |              |                                  |
|                                                                               |                                  | 269 to 506                                          | 0 to 0                           | 105 to 197                        | 0 to 0       |                                  |
|                                                                               | <b>269 to 506 more FN in ESS</b> |                                                     | <b>105 to 197 more FN in ESS</b> |                                   |              |                                  |
| <b>True negatives</b><br>(patients without OSA)                               | ⊕⊕○○<br>LOW <sup>1,2</sup>       | 180 to 259                                          | 360 to 360                       | 375 to 540                        | 750 to 750   | 4093<br>(5) <sup>A-E</sup>       |
| <b>False positives</b><br>(patients incorrectly classified as having OSA)     |                                  | <b>101 to 180 fewer TN in ESS</b>                   |                                  | <b>210 to 375 fewer TN in ESS</b> |              |                                  |
|                                                                               |                                  | 101 to 180                                          | 0 to 0                           | 201 to 375                        | 0 to 0       |                                  |
|                                                                               | <b>101 to 180 more FP in ESS</b> |                                                     | <b>201 to 375 more FP in ESS</b> |                                   |              |                                  |

<sup>1</sup>Wide range of values for sensitivity and specificity

<sup>2</sup>Confidence interval for studies is wide

**Table S10—Summary of Findings table for ESS vs. PSG to diagnose OSA in Suspected Adults (AHI ≥ 30)**

References: Ulasli 2014 (A); Pataka 2014 (B); Luo 2014 (C)

Range of sensitivities ESS: 0.53 to 0.63 | Range of specificities ESS: 0.54 to 0.62 Range of sensitivities Attended PSG: 1.00 to 1.00 | Range of specificities Attended PSG: 1.00 to 1.00 Accuracy (high risk): 46% to 48% Accuracy (low risk): 54% to 58%

| Test result                                                                   | Quality of the Evidence (GRADE) | Number of results per 1000 patients tested (95% CI) |              |                                   |              | Number of participants (studies) |
|-------------------------------------------------------------------------------|---------------------------------|-----------------------------------------------------|--------------|-----------------------------------|--------------|----------------------------------|
|                                                                               |                                 | Prevalence 36%                                      |              | Prevalence 10%                    |              |                                  |
|                                                                               |                                 | ESS                                                 | Attended PSG | ESS                               | Attended PSG |                                  |
| <b>True positives</b><br>(patients with OSA)                                  | ⊕⊕⊕⊕<br>HIGH                    | 191 to 227                                          | 360 to 360   | 53 to 63                          | 100 to 100   | 3515<br>(3) <sup>A-C</sup>       |
| <b>False negatives</b><br>(patients incorrectly classified as not having OSA) |                                 | <b>133 to 169 fewer TP in ESS</b>                   |              | <b>37 to 47 fewer TP in ESS</b>   |              |                                  |
|                                                                               |                                 | 133 to 169                                          | 0 to 0       | 37 to 47                          | 0 to 0       |                                  |
|                                                                               |                                 | <b>133 to 169 more FN in ESS</b>                    |              | <b>105 to 197 more FN in ESS</b>  |              |                                  |
| <b>True negatives</b><br>(patients without OSA)                               | ⊕⊕⊕⊕<br>HIGH                    | 346 to 397                                          | 640 to 640   | 486 to 558                        | 900 to 900   | 3515<br>(3) <sup>A-C</sup>       |
| <b>False positives</b><br>(patients incorrectly classified as having OSA)     |                                 | <b>243 to 294 fewer TN in ESS</b>                   |              | <b>342 to 414 fewer TN in ESS</b> |              |                                  |
|                                                                               |                                 | 243 to 294                                          | 0 to 0       | 342 to 414                        | 0 to 0       |                                  |
|                                                                               |                                 | <b>243 to 294 more FP in ESS</b>                    |              | <b>342 to 414 more FP in ESS</b>  |              |                                  |



**Table S11—Summary of Findings table for ESS vs. HSAT to diagnose OSA in Suspected Adults (AHI ≥ 5)**

References: Facco 2012 (A)

Single study sensitivity ESS: 0.36 (95% CI: 0.19 to 0.57) | Single study specificity ESS: 0.77 (95% CI: 0.66 to 0.86)  
 Single study sensitivity HSAT: 1.00 (95% CI: 1.00 to 1.00) | Single study specificity HSAT: 1.00 (95% CI: 1.00 to 1.00)  
 Accuracy (high risk): 41% (95% CI: 25 to 61%) Accuracy (low risk): 54% (95% CI: 40 to 70%)

| Test result                                                                   | Quality of the Evidence (GRADE) | Number of results per 1000 patients tested (95% CI) |                  |                            |                  | Number of participants (studies) |
|-------------------------------------------------------------------------------|---------------------------------|-----------------------------------------------------|------------------|----------------------------|------------------|----------------------------------|
|                                                                               |                                 | Prevalence 87%                                      |                  | Prevalence 55%             |                  |                                  |
|                                                                               |                                 | ESS                                                 | HSAT             | ESS                        | HSAT             |                                  |
| <b>True positives</b><br>(patients with OSA)                                  | ⊕⊕○○<br>LOW <sup>1,2</sup>      | 313 (165 to 496)                                    | 870 (870 to 870) | 198 (105 to 314)           | 550 (550 to 550) | 100 (1) <sup>A</sup>             |
|                                                                               |                                 | <b>557 fewer TP in ESS</b>                          |                  | <b>352 fewer TP in ESS</b> |                  |                                  |
| <b>False negatives</b><br>(patients incorrectly classified as not having OSA) |                                 | 557 (374 to 705)                                    | 0 (0 to 0)       | 352 (236 to 445)           | 0 (0 to 0)       |                                  |
|                                                                               |                                 | <b>557 more FN in ESS</b>                           |                  | <b>352 more FN in ESS</b>  |                  |                                  |
| <b>True negatives</b><br>(patients without OSA)                               | ⊕⊕○○<br>LOW <sup>1,2</sup>      | 100 (86 to 112)                                     | 130 (130 to 130) | 347 (297 to 387)           | 450 (450 to 450) | 100 (1) <sup>A</sup>             |
|                                                                               |                                 | <b>30 fewer TN in ESS</b>                           |                  | <b>103 fewer TN in ESS</b> |                  |                                  |
| <b>False positives</b><br>(patients incorrectly classified as having OSA)     |                                 | 30 (18 to 44)                                       | 0 (0 to 0)       | 103 (63 to 153)            | 0 (0 to 0)       |                                  |
|                                                                               |                                 | <b>30 more FP in ESS</b>                            |                  | <b>103 more FP in ESS</b>  |                  |                                  |

<sup>1</sup>Study consisted of pregnant women

<sup>2</sup>Wide confidence interval for sensitivity and specificity

**Figure S8—STOP-BANG Questionnaire vs. PSG to diagnose OSA in Suspected Adults (AHI ≥ 5)**

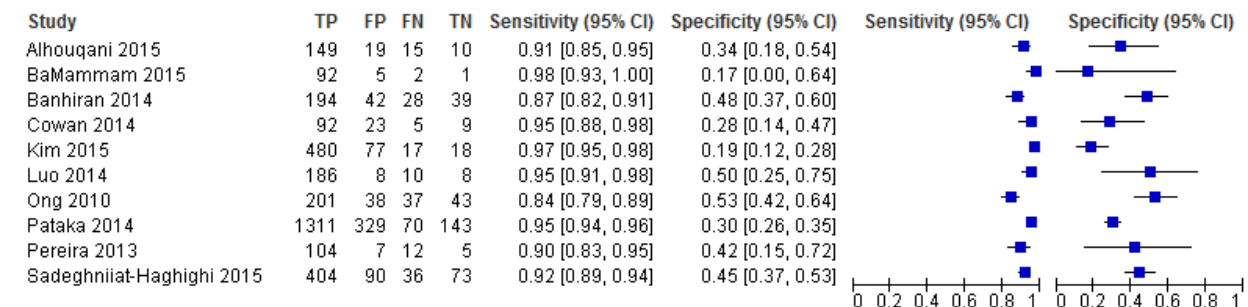

**Pooled sensitivity:** 0.93 [0.90, 0.95]

**Pooled specificity:** 0.36 [0.29, 0.44]

**LR+:** 1.46 [1.32, 1.62]

**LR-:** 0.19 [0.16, 0.23]

**DOR:** 7.72 [6.35, 9.39]

**Accuracy:** 0.80 or **80%**

**Figure S9—ROC Curve for STOP-BANG Questionnaire vs. PSG to diagnose OSA in Suspected Adults (AHI  $\geq 5$ )**

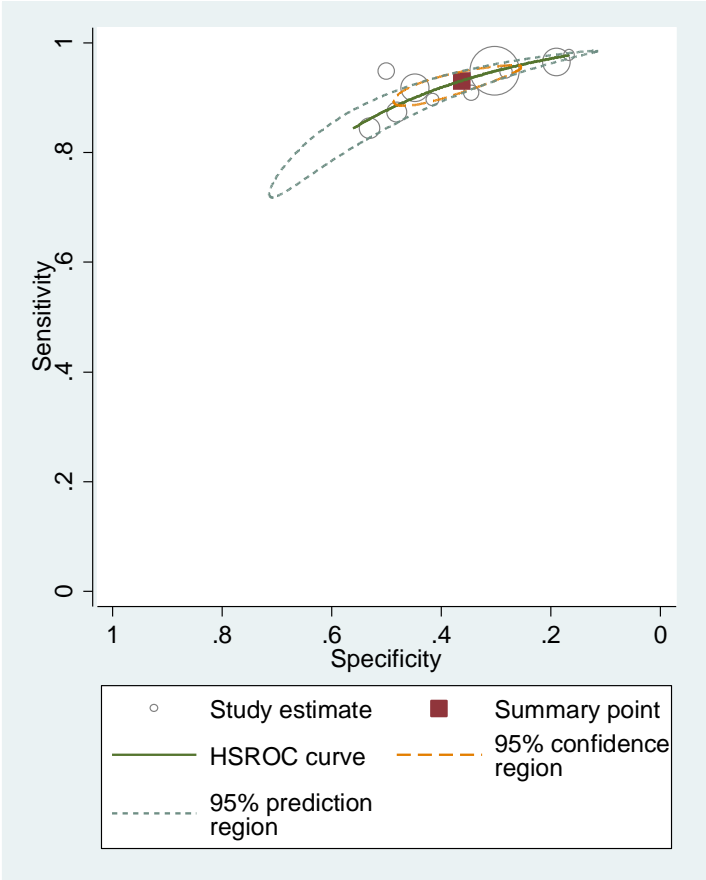

**Table S12—Summary of Findings table for STOP-BANG Questionnaire vs. PSG to diagnose OSA in Suspected Adults (AHI ≥ 5)**

**References:** Alouqani 2015 (A); BaHammam 2015 (B); Banhيران 2014 (C); Cowan 2014 (D); Kim 2015 (E); Luo 2014 (F); Ong 2010 (G); Pataka 2014 (H); Pereira 2013 (I); Sadeghniaat-Haghighi 2015 (J)

**Pooled sensitivity STOP-BANG Questionnaire:** 0.93 (95% CI: 0.90 to 0.95) | **Pooled specificity STOP-BANG Questionnaire:** 0.36 (95% CI: 0.29 to 0.44) | **Pooled sensitivity Attended PSG:** 1.00 (95% CI: 1.00 to 1.00) | **Pooled specificity Attended PSG:** 1.00 (95% CI: 1.00 to 1.00) | **Accuracy (high risk):** 53% (95% CI: 52 to 53%) | **Accuracy (low risk):** 40% (95% CI: 38 to 42%)

| Test result                                                                   | Quality of the Evidence (GRADE) | Number of results per 1000 patients tested (95% CI) |                  |                                                |                  | Number of participants (studies) |
|-------------------------------------------------------------------------------|---------------------------------|-----------------------------------------------------|------------------|------------------------------------------------|------------------|----------------------------------|
|                                                                               |                                 | Prevalence 87%                                      |                  | Prevalence 55%                                 |                  |                                  |
|                                                                               |                                 | STOP- BANG Questionnaire                            | Attended PSG     | STOP- BANG Questionnaire                       | Attended PSG     |                                  |
| <b>True positives</b><br>(patients with OSA)                                  | ⊕⊕○○<br>LOW <sup>1,2</sup>      | 809 (783 to 827)                                    | 870 (870 to 870) | 512 (495 to 523)                               | 550 (550 to 550) | 4432 (10) <sup>A-J</sup>         |
|                                                                               |                                 | <b>61 fewer TP in STOP-BANG Questionnaire</b>       |                  | <b>38 fewer TP in STOP-BANG Questionnaire</b>  |                  |                                  |
|                                                                               |                                 | 61 (43 to 87)                                       | 0 (0 to 0)       | 38 (27 to 55)                                  | 0 (0 to 0)       |                                  |
|                                                                               |                                 | <b>61 more FN in STOP-BANG Questionnaire</b>        |                  | <b>38 more FN in STOP-BANG Questionnaire</b>   |                  |                                  |
| <b>False negatives</b><br>(patients incorrectly classified as not having OSA) |                                 |                                                     |                  |                                                |                  |                                  |
|                                                                               |                                 | <b>83 fewer TN in STOP-BANG Questionnaire</b>       |                  | <b>288 fewer TN in STOP-BANG Questionnaire</b> |                  |                                  |
|                                                                               |                                 | 83 (73 to 92)                                       | 0 (0 to 0)       | 288 (252 to 320)                               | 0 (0 to 0)       |                                  |
|                                                                               |                                 | <b>83 more FP in STOP-BANG Questionnaire</b>        |                  | <b>288 more FP in STOP-BANG Questionnaire</b>  |                  |                                  |
| <b>True negatives</b><br>(patients without OSA)                               | ⊕⊕○○<br>LOW <sup>1,2</sup>      | 47 (38 to 57)                                       | 130 (130 to 130) | 162 (130 to 198)                               | 450 (450 to 450) | 4432 (10) <sup>A-J</sup>         |
|                                                                               |                                 | <b>83 fewer TN in STOP-BANG Questionnaire</b>       |                  | <b>288 fewer TN in STOP-BANG Questionnaire</b> |                  |                                  |
|                                                                               |                                 | 83 (73 to 92)                                       | 0 (0 to 0)       | 288 (252 to 320)                               | 0 (0 to 0)       |                                  |
|                                                                               |                                 | <b>83 more FP in STOP-BANG Questionnaire</b>        |                  | <b>288 more FP in STOP-BANG Questionnaire</b>  |                  |                                  |
| <b>False positives</b><br>(patients incorrectly classified as having OSA)     |                                 |                                                     |                  |                                                |                  |                                  |
|                                                                               |                                 | <b>83 fewer TN in STOP-BANG Questionnaire</b>       |                  | <b>288 fewer TN in STOP-BANG Questionnaire</b> |                  |                                  |
|                                                                               |                                 | 83 (73 to 92)                                       | 0 (0 to 0)       | 288 (252 to 320)                               | 0 (0 to 0)       |                                  |
|                                                                               |                                 | <b>83 more FP in STOP-BANG Questionnaire</b>        |                  | <b>288 more FP in STOP-BANG Questionnaire</b>  |                  |                                  |

<sup>1</sup>Broad range of specificity across studies

<sup>2</sup>Wide confidence intervals for specificity

**Figure S10—STOP-BANG Questionnaire vs. PSG to diagnose OSA in Suspected Adults (AHI ≥ 15)**

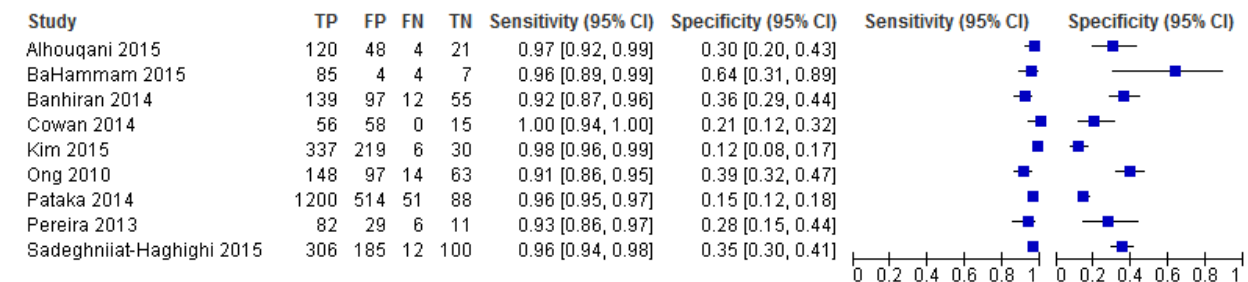

**Pooled sensitivity:** 0.95 [0.94, 0.97]

**Pooled specificity:** 0.27 [0.20, 0.36]

**LR+:** 1.31 [1.18, 1.45]

**LR-:** 0.17 [0.12, 0.23]

**DOR:** 7.86 [5.37, 11.49]

**Accuracy:** 0.68 or **68%**

**Figure S11—STOP-BANG Questionnaire vs. PSG to diagnose OSA in Suspected Adults (AHI  $\geq 15$ )**

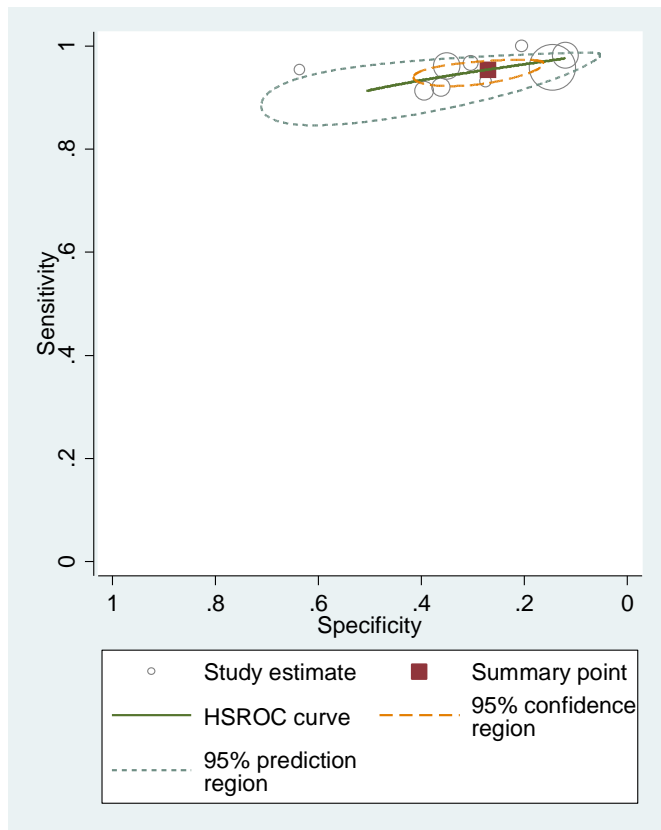

**Table S13—Summary of Findings table for STOP-BANG Questionnaire vs. PSG to diagnose OSA in Suspected Adults (AHI ≥ 15)**

References: Alouqani 2015 (A); BaHammam 2015 (B); Banhiran 2014 (C); Cowan 2014 (D); Kim 2015 (E); Ong 2010 (F); Pataka 2014 (G); Pereira 2013 (H); Sadeghniaat-Highighi 2015 (I)

Pooled sensitivity STOP-BANG Questionnaire: 0.95 (95% CI: 0.94 to 0.97) | Pooled specificity STOP-BANG Questionnaire: 0.27 (95% CI: 0.20 to 0.36) | Pooled sensitivity Attended PSG: 1.00 (95% CI: 1.00 to 1.00) | Pooled specificity Attended PSG: 1.00 (95% CI: 1.00 to 1.00) | Accuracy (high risk): 70% (95% CI: 69 to 72%) | Accuracy (low risk): 43% (95% CI: 42 to 44%)

| Test result                                                                   | Quality of the Evidence (GRADE) | Number of results per 1000 patients tested (95% CI) |                                                |                          |                  | Number of participants (studies) |
|-------------------------------------------------------------------------------|---------------------------------|-----------------------------------------------------|------------------------------------------------|--------------------------|------------------|----------------------------------|
|                                                                               |                                 | Prevalence 64%                                      |                                                | Prevalence 25%           |                  |                                  |
|                                                                               |                                 | STOP- BANG Questionnaire                            | Attended PSG                                   | STOP- BANG Questionnaire | Attended PSG     |                                  |
| <b>True positives</b><br>(patients with OSA)                                  | ⊕⊕○○<br>LOW <sup>1,2</sup>      | 614 (602 to 621)                                    | 640 (640 to 640)                               | 240 (235 to 243)         | 250 (250 to 250) | 4223 (9) <sup>A-1</sup>          |
| <b>False negatives</b><br>(patients incorrectly classified as not having OSA) |                                 | <b>26 fewer TP in STOP-BANG Questionnaire</b>       | <b>10 fewer TP in STOP-BANG Questionnaire</b>  |                          |                  |                                  |
|                                                                               |                                 | 26 (19 to 38)                                       | 0 (0 to 0)                                     | 10 (7 to 15)             | 0 (0 to 0)       |                                  |
|                                                                               |                                 | <b>26 more FN in STOP-BANG Questionnaire</b>        | <b>10 more FN in STOP-BANG Questionnaire</b>   |                          |                  |                                  |
| <b>True negatives</b><br>(patients without OSA)                               | ⊕⊕○○<br>LOW <sup>1,2</sup>      | 90 (65 to 122)                                      | 360 (360 to 360)                               | 188 (135 to 255)         | 750 (750 to 750) | 4223 (9) <sup>A-1</sup>          |
| <b>False positives</b><br>(patients incorrectly classified as having OSA)     |                                 | <b>270 fewer TN in STOP-BANG Questionnaire</b>      | <b>562 fewer TN in STOP-BANG Questionnaire</b> |                          |                  |                                  |
|                                                                               |                                 | 270 (238 to 295)                                    | 0 (0 to 0)                                     | 562 (495 to 615)         | 0 (0 to 0)       |                                  |
|                                                                               |                                 | <b>270 more FP in STOP-BANG Questionnaire</b>       | <b>562 more FP in STOP-BANG Questionnaire</b>  |                          |                  |                                  |

<sup>1</sup>Broad range of specificity across studies

<sup>2</sup>Wide confidence intervals for specificity

**Figure S12—STOP-BANG Questionnaire vs. PSG to diagnose OSA in Suspected Adults (AHI ≥ 30)**

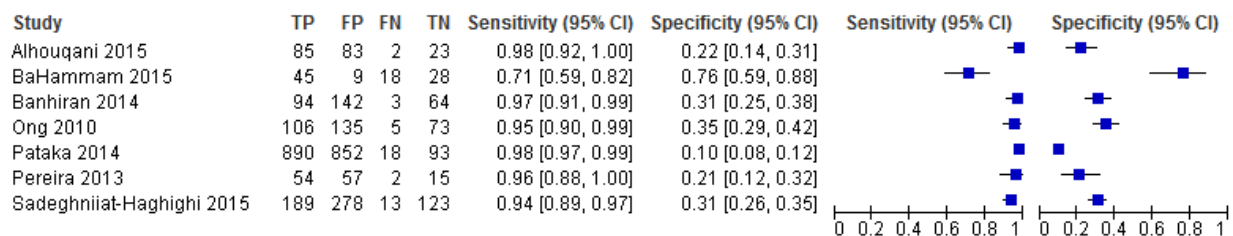

**Pooled sensitivity:** 0.94 [0.90, 0.97]

**Pooled specificity:** 0.30 [0.17, 0.46]

**LR+:** 1.34 [1.12, 1.61]

**LR-:** 0.18 [0.14, 0.24]

**DOR:** 7.37 [5.37, 10.1]

**Accuracy:** 0.54 or **54%**

**Figure S13—ROC Curve for STOP-BANG Questionnaire vs. PSG to diagnose OSA in Suspected Adults (AHI ≥ 30)**

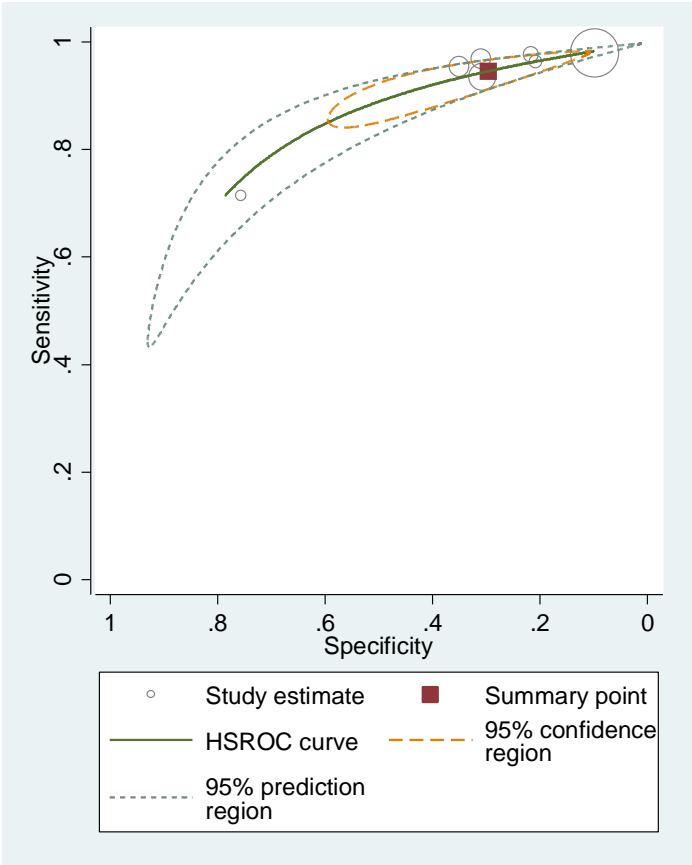

**Table S14—Summary of Findings table for STOP-BANG Questionnaire vs. PSG to diagnose OSA in Suspected Adults (AHI ≥ 30)**

**References:** Alouqani 2015 (A); BaHammam 2015 (B); Bahhiraan 2014 (C); Ong 2010 (D); Pataka 2014 (E); Pereira 2013 (F); Sadeghniaat-Highighi 2015 (G)

**Pooled sensitivity STOP-BANG Questionnaire:** 0.94 (95% CI: 0.90 to 0.97) | **Pooled specificity STOP-BANG Questionnaire:** 0.30 (95% CI: 0.17 to 0.46) | **Pooled sensitivity Attended PSG:** 1.00 (95% CI: 1.00 to 1.00) | **Pooled specificity Attended PSG:** 1.00 (95% CI: 1.00 to 1.00) | **Accuracy (high risk):** 53% (95% CI: 53 to 55%) | **Accuracy (low risk):** 36% (95% CI: 33 to 40%)

| Test result                                                                   | Quality of the Evidence (GRADE)                                                    | Number of results per 1000 patients tested (95% CI) |                  |                                                |                  | Number of participants (studies) |
|-------------------------------------------------------------------------------|------------------------------------------------------------------------------------|-----------------------------------------------------|------------------|------------------------------------------------|------------------|----------------------------------|
|                                                                               |                                                                                    | Prevalence 36%                                      |                  | Prevalence 10%                                 |                  |                                  |
|                                                                               |                                                                                    | STOP- BANG Questionnaire                            | Attended PSG     | STOP- BANG Questionnaire                       | Attended PSG     |                                  |
| <b>True positives</b><br>(patients with OSA)                                  |   | 338 (324 to 349)                                    | 360 (360 to 360) | 94 (90 to 97)                                  | 100 (100 to 100) | 3449 (7) <sup>A-G</sup>          |
|                                                                               |                                                                                    | <b>22 fewer TP in STOP-BANG Questionnaire</b>       |                  | <b>6 fewer TP in STOP-BANG Questionnaire</b>   |                  |                                  |
|                                                                               |                                                                                    | 22 (11 to 36)                                       | 0 (0 to 0)       | 6 (3 to 10)                                    | 0 (0 to 0)       |                                  |
|                                                                               |                                                                                    | <b>22 more FN in STOP-BANG Questionnaire</b>        |                  | <b>6 more FN in STOP-BANG Questionnaire</b>    |                  |                                  |
| <b>False negatives</b><br>(patients incorrectly classified as not having OSA) |                                                                                    | 192 (109 to 294)                                    | 640 (640 to 640) | 270 (153 to 414)                               | 900 (900 to 900) | 3449 (7) <sup>A-G</sup>          |
|                                                                               |                                                                                    | <b>448 fewer TN in STOP-BANG Questionnaire</b>      |                  | <b>630 fewer TN in STOP-BANG Questionnaire</b> |                  |                                  |
|                                                                               |                                                                                    | 448 (346 to 531)                                    | 0 (0 to 0)       | 630 (486 to 747)                               | 0 (0 to 0)       |                                  |
|                                                                               |                                                                                    | <b>270 more FP in STOP-BANG Questionnaire</b>       |                  | <b>630 more FP in STOP-BANG Questionnaire</b>  |                  |                                  |
| <b>True negatives</b><br>(patients without OSA)                               |  | 192 (109 to 294)                                    | 640 (640 to 640) | 270 (153 to 414)                               | 900 (900 to 900) | 3449 (7) <sup>A-G</sup>          |
|                                                                               |                                                                                    | <b>448 fewer TN in STOP-BANG Questionnaire</b>      |                  | <b>630 fewer TN in STOP-BANG Questionnaire</b> |                  |                                  |
|                                                                               |                                                                                    | 448 (346 to 531)                                    | 0 (0 to 0)       | 630 (486 to 747)                               | 0 (0 to 0)       |                                  |
|                                                                               |                                                                                    | <b>270 more FP in STOP-BANG Questionnaire</b>       |                  | <b>630 more FP in STOP-BANG Questionnaire</b>  |                  |                                  |
| <b>False positives</b><br>(patients incorrectly classified as having OSA)     |                                                                                    | 192 (109 to 294)                                    | 640 (640 to 640) | 270 (153 to 414)                               | 900 (900 to 900) | 3449 (7) <sup>A-G</sup>          |
|                                                                               |                                                                                    | <b>448 fewer TN in STOP-BANG Questionnaire</b>      |                  | <b>630 fewer TN in STOP-BANG Questionnaire</b> |                  |                                  |
|                                                                               |                                                                                    | 448 (346 to 531)                                    | 0 (0 to 0)       | 630 (486 to 747)                               | 0 (0 to 0)       |                                  |
|                                                                               |                                                                                    | <b>270 more FP in STOP-BANG Questionnaire</b>       |                  | <b>630 more FP in STOP-BANG Questionnaire</b>  |                  |                                  |

<sup>1</sup>Broad range of specificity across studies

<sup>2</sup>Wide confidence intervals for specificity

**Table S15—Summary of Findings table for STOP-BANG Questionnaire vs. HSAT to diagnose OSA in Suspected Adults (AHI ≥ 5)**

References: Chung 2013 (A)

Single study sensitivity STOP- BANG Questionnaire: 0.87 (95% CI: 0.80 to 0.92) | Single study specificity STOP- BANG Questionnaire: 0.33 (95% CI: 0.21 to 0.48) | Single study sensitivity HSAT: 1.00 (95% CI: 1.00 to 1.00) | Single study specificity HSAT: 1.00 (95% CI: 1.00 to 1.00) | Accuracy (high risk): 80% (95% CI: 72 to 86%) | Accuracy (low risk): 63% (95% CI: 53 to 72%)

| Test result                                                                   | Quality of the Evidence (GRADE) | Number of results per 1000 patients tested (95% CI) |                  |                                                 |                  | Number of participants (studies) |
|-------------------------------------------------------------------------------|---------------------------------|-----------------------------------------------------|------------------|-------------------------------------------------|------------------|----------------------------------|
|                                                                               |                                 | Prevalence 87%                                      |                  | Prevalence 55%                                  |                  |                                  |
|                                                                               |                                 | STOP- BANG Questionnaire                            | HSAT             | STOP- BANG Questionnaire                        | HSAT             |                                  |
| <b>True positives</b><br>(patients with OSA)                                  | ⊕⊕⊕⊕<br>HIGH                    | 757 (696 to 800)                                    | 870 (870 to 870) | 479 (440 to 506)                                | 550 (550 to 550) | 192 <sup>A</sup><br>(1)          |
|                                                                               |                                 | <b>113 fewer TP in STOP- BANG Questionnaire</b>     |                  | <b>71 fewer TP in STOP- BANG Questionnaire</b>  |                  |                                  |
|                                                                               |                                 | 113 (174 to 70)                                     | 0 (0 to 0)       | 71 (44 to 110)                                  | 0 (0 to 0)       |                                  |
|                                                                               |                                 | <b>113 more FN in STOP- BANG Questionnaire</b>      |                  | <b>71 more FN in STOP- BANG Questionnaire</b>   |                  |                                  |
| <b>False negatives</b><br>(patients incorrectly classified as not having OSA) | ⊕⊕⊕⊕<br>HIGH                    | 43 (27 to 62)                                       | 130 (130 to 130) | 149 (94 to 216)                                 | 450 (450 to 450) | 192 <sup>A</sup><br>(1)          |
|                                                                               |                                 | <b>87 fewer TN in STOP- BANG Questionnaire</b>      |                  | <b>301 fewer TN in STOP- BANG Questionnaire</b> |                  |                                  |
|                                                                               |                                 | 87 (68 to 103)                                      | 0 (0 to 0)       | 301 (234 to 356)                                | 0 (0 to 0)       |                                  |
|                                                                               |                                 | <b>87 more FP in STOP- BANG Questionnaire</b>       |                  | <b>301 more FP in STOP- BANG Questionnaire</b>  |                  |                                  |



**Table S16—Summary of Findings table for STOP-BANG Questionnaire vs. HSAT to diagnose OSA in Suspected Adults (AHI ≥ 15)**

References: Chung 2013 (A); Nicholl 2013 (B)

Range of sensitivities STOP-BANG Questionnaire: 0.88 to 0.94 | Range of specificities STOP-BANG Questionnaire: 0.24 to 0.31

Range of sensitivities HSAT: 1.00 to 1.00 | Range of specificities HSAT: 1.00 to 1.00 Accuracy (high risk): 65% to 71% Accuracy (low risk): 40% to 47%

| Test result                                                                   | Quality of the Evidence (GRADE) | Number of results per 1000 patients tested (95% CI)   |            |                                                       |            | Number of participants (studies) |
|-------------------------------------------------------------------------------|---------------------------------|-------------------------------------------------------|------------|-------------------------------------------------------|------------|----------------------------------|
|                                                                               |                                 | Prevalence 64%                                        |            | Prevalence 25%                                        |            |                                  |
|                                                                               |                                 | STOP- BANG Questionnaire                              | HSAT       | STOP- BANG Questionnaire                              | HSAT       |                                  |
| <b>True positives</b><br>(patients with OSA)                                  | ⊕⊕⊕○<br>MODERATE <sup>1</sup>   | 563 to 602                                            | 640 to 640 | 220 to 235                                            | 250 to 250 | 364<br>(2) <sup>A,B</sup>        |
| <b>False negatives</b><br>(patients incorrectly classified as not having OSA) |                                 | <b>38 to 77 fewer TP in STOP-BANG Questionnaire</b>   |            | <b>15 to 30 fewer TP in STOP-BANG Questionnaire</b>   |            |                                  |
|                                                                               |                                 | 38 to 77                                              | 0 to 0     | 15 to 30                                              | 0 to 0     |                                  |
|                                                                               |                                 | <b>38 to 77 more FN in STOP-BANG Questionnaire</b>    |            | <b>15 to 30 more FN in STOP- BANG Questionnaire</b>   |            |                                  |
| <b>True negatives</b><br>(patients without OSA)                               | ⊕⊕⊕○<br>MODERATE <sup>1</sup>   | 86 to 112                                             | 360 to 360 | 180 to 232                                            | 750 to 750 | 364<br>(2) <sup>A,B</sup>        |
| <b>False positives</b><br>(patients incorrectly classified as having OSA)     |                                 | <b>248 to 274 fewer TN in STOP-BANG Questionnaire</b> |            | <b>570 to 518 fewer TN in STOP-BANG Questionnaire</b> |            |                                  |
|                                                                               |                                 | 248 to 274                                            | 0 to 0     | 518 to 570                                            | 0 to 0     |                                  |
|                                                                               |                                 | <b>248 to 274 more FP in STOP-BANG Questionnaire</b>  |            | <b>518 to 570 more FP in STOP-BANG Questionnaire</b>  |            |                                  |

<sup>1</sup>Indirect evidence as one of the two studies consisted of chronic kidney disease and end-stage renal disease patients.

**Table S17—Summary of Findings table for STOP-BANG Questionnaire vs. HSAT to diagnose OSA in Suspected Adults (AHI ≥ 30)**

References: Chung 2013 (A); Nicholl 2013 (B)

Range of sensitivities STOP- BANG Questionnaire: 0.88 to 1.00 | Range of specificities STOP- BANG Questionnaire: 0.20 to 0.53 | Range of sensitivities HSAT: 1.00 to 1.00 | Range of specificities HSAT: 1.00 to 1.00 | Accuracy (high risk): 44% to 70% | Accuracy (low risk): 27% to 58%

| Test result                                                                   | Quality of the Evidence (GRADE) | Number of results per 1000 patients tested (95% CI)    |                                                          |                          |            | Number of participants (studies) |
|-------------------------------------------------------------------------------|---------------------------------|--------------------------------------------------------|----------------------------------------------------------|--------------------------|------------|----------------------------------|
|                                                                               |                                 | Prevalence 36%                                         |                                                          | Prevalence 10%           |            |                                  |
|                                                                               |                                 | STOP- BANG Questionnaire                               | HSAT                                                     | STOP- BANG Questionnaire | HSAT       |                                  |
| <b>True positives</b><br>(patients with OSA)                                  | ⊕⊕○○<br>LOW <sup>1,2</sup>      | 317 to 360                                             | 360 to 360                                               | 88 to 100                | 100 to 100 | 364 <sup>A,B</sup><br>(2)        |
| <b>False negatives</b><br>(patients incorrectly classified as not having OSA) |                                 | 0 to 43                                                | 0 to 0                                                   | 0 to 12                  | 0 to 0     |                                  |
|                                                                               |                                 | <b>0 to 43 fewer TP in STOP- BANG Questionnaire</b>    | <b>0 to 12 fewer TP in STOP- BANG Questionnaire</b>      |                          |            |                                  |
|                                                                               |                                 | <b>0 to 43 more FN in STOP- BANG Questionnaire</b>     | <b>0 more to 12 fewer FN in STOP- BANG Questionnaire</b> |                          |            |                                  |
| <b>True negatives</b><br>(patients without OSA)                               | ⊕⊕○○<br>LOW <sup>1,2</sup>      | 128 to 339                                             | 640 to 640                                               | 180 to 477               | 900 to 900 | 364 <sup>A,B</sup><br>(2)        |
| <b>False positives</b><br>(patients incorrectly classified as having OSA)     |                                 | 301 to 512                                             | 0 to 0                                                   | 423 to 720               | 0 to 0     |                                  |
|                                                                               |                                 | <b>301 to 512 fewer TN in STOP- BANG Questionnaire</b> | <b>423 to 720 fewer TN in STOP- BANG Questionnaire</b>   |                          |            |                                  |
|                                                                               |                                 | <b>301 to 512 more FP in STOP- BANG Questionnaire</b>  | <b>423 to 720 more FP in STOP- BANG Questionnaire</b>    |                          |            |                                  |

<sup>1</sup>Indirect evidence as one study consisted of pregnant women, and the other study consisted of chronic kidney disease and end-stage renal disease patients

<sup>2</sup>Broad range of specificity across studies

**Table S18—Summary of Findings table for STOP-BANG Questionnaire vs. PSG or HSAT to diagnose OSA in Suspected Adults (AHI ≥ 5)**

References: Chung 2013 (A); Nicholl 2013 (B)

Range of sensitivities STOP- BANG Questionnaire: 0.18 to 0.90 | Range of specificities STOP- BANG Questionnaire: 0.28 to 0.88 | Range of sensitivities PSG or HSAT: 1.00 to 1.00 | Range of specificities PSG or HSAT: 1.00 to 1.00  
Accuracy (high risk): 19% to 90% Accuracy (low risk): 22% to 89%

| Test result                                                                   | Quality of the Evidence (GRADE) | Number of results per 1000 patients tested (95% CI)  |             |                                                      |             | Number of participants (studies) |
|-------------------------------------------------------------------------------|---------------------------------|------------------------------------------------------|-------------|------------------------------------------------------|-------------|----------------------------------|
|                                                                               |                                 | Prevalence 87%                                       |             | Prevalence 55%                                       |             |                                  |
|                                                                               |                                 | STOP- BANG Questionnaire                             | PSG or HSAT | STOP- BANG Questionnaire                             | PSG or HSAT |                                  |
| <b>True positives</b><br>(patients with OSA)                                  | ⊕⊕○○<br>LOW <sup>1,2</sup>      | 157 to 783                                           | 870 to 870  | 99 to 495                                            | 550 to 550  | 364<br>(2) <sup>A,B</sup>        |
|                                                                               |                                 | <b>87 to 713 fewer TP in STOP-BANG Questionnaire</b> |             | <b>55 to 451 fewer TP in STOP-BANG Questionnaire</b> |             |                                  |
|                                                                               |                                 | 87 to 713                                            | 0 to 0      | 55 to 451                                            | 0 to 0      |                                  |
|                                                                               |                                 | <b>87 to 713 more FN in STOP-BANG Questionnaire</b>  |             | <b>55 to 451 more FN in STOP-BANG Questionnaire</b>  |             |                                  |
| <b>False negatives</b><br>(patients incorrectly classified as not having OSA) | ⊕⊕○○<br>LOW <sup>1,2</sup>      | 36 to 114                                            | 130 to 130  | 126 to 396                                           | 450 to 450  | 364<br>(2) <sup>A,B</sup>        |
|                                                                               |                                 | <b>16 to 94 fewer TN in STOP-BANG Questionnaire</b>  |             | <b>54 to 324 fewer TN in STOP-BANG Questionnaire</b> |             |                                  |
|                                                                               |                                 | 16 to 94                                             | 0 to 0      | 54 to 324                                            | 0 to 0      |                                  |
|                                                                               |                                 | <b>16 to 94 more FP in STOP-BANG Questionnaire</b>   |             | <b>54 to 324 more FP in STOP-BANG Questionnaire</b>  |             |                                  |

<sup>1</sup>Indirect evidence as one study consisted of pregnant women, and the other study consisted of chronic kidney disease and end-stage renal disease patients

<sup>2</sup>Broad range of specificity across studies

**Table S19—Summary of Findings table for STOP-BANG Questionnaire vs. PSG or HSAT to diagnose OSA in Suspected Adults (AHI ≥ 15)**

References: Chung 2012 (A); Chung 2013 (B)

Range of sensitivities STOP- BANG Questionnaire: 0.10 to 0.95 | Range of specificities STOP- BANG Questionnaire: 0.11 to 0.88

Range of sensitivities PSG or HSAT: 1.00 to 1.00 | Range of specificities PSG or HSAT: 1.00 to 1.00 Accuracy (high risk): 10% to 92% Accuracy (low risk): 11% to 90%

| Test result                                                                   | Quality of the Evidence (GRADE) | Number of results per 1000 patients tested (95% CI)  |             |                                                      |             | Number of participants (studies) |
|-------------------------------------------------------------------------------|---------------------------------|------------------------------------------------------|-------------|------------------------------------------------------|-------------|----------------------------------|
|                                                                               |                                 | Prevalence 64%                                       |             | Prevalence 25%                                       |             |                                  |
|                                                                               |                                 | STOP- BANG Questionnaire                             | PSG or HSAT | STOP- BANG Questionnaire                             | PSG or HSAT |                                  |
| <b>True positives</b><br>(patients with OSA)                                  | ⊕⊕○○<br>LOW <sup>1,2</sup>      | 64 to 608                                            | 640 to 640  | 25 to 238                                            | 250 to 250  | 1056 <sup>A,B</sup><br>(2)       |
|                                                                               |                                 | <b>32 to 576 fewer TP in STOP-BANG Questionnaire</b> |             | <b>12 to 225 fewer TP in STOP-BANG Questionnaire</b> |             |                                  |
| <b>False negatives</b><br>(patients incorrectly classified as not having OSA) |                                 | 32 to 576                                            | 0 to 0      | 12 to 225                                            | 0 to 0      |                                  |
|                                                                               |                                 | <b>32 to 576 more FN in STOP-BANG Questionnaire</b>  |             | <b>12 to 225 more FN in STOP-BANG Questionnaire</b>  |             |                                  |
| <b>True negatives</b><br>(patients without OSA)                               | ⊕⊕○○<br>LOW <sup>1,2</sup>      | 40 to 317                                            | 360 to 360  | 83 to 660                                            | 750 to 750  | 1056 <sup>A,B</sup><br>(2)       |
|                                                                               |                                 | <b>43 to 320 fewer TN in STOP-BANG Questionnaire</b> |             | <b>90 to 667 fewer TN in STOP-BANG Questionnaire</b> |             |                                  |
| <b>False positives</b><br>(patients incorrectly classified as having OSA)     |                                 | 43 to 320                                            | 0 to 0      | 90 to 667                                            | 0 to 0      |                                  |
|                                                                               |                                 | <b>43 to 320 more FP in STOP-BANG Questionnaire</b>  |             | <b>90 to 667 more FP in STOP-BANG Questionnaire</b>  |             |                                  |

<sup>1</sup>Indirect evidence as one study consisted of pregnant women

<sup>2</sup>Wide range of specificity and sensitivity

**Table S20—Summary of Findings table for STOP-BANG Questionnaire vs. PSG or HSAT to diagnose OSA in Suspected Adults (AHI ≥ 30)**

References: Chung 2012 (A); Chung 2013 (B)

Range of sensitivities STOP- BANG Questionnaire: 0.28 to 1.00 | Range of specificities STOP- BANG Questionnaire: 0.17 to 0.88 | Range of sensitivities PSG or HSAT: 1.00 to 1.00 | Range of specificities PSG or HSAT: 1.00 to 1.00  
Accuracy (high risk): 21% to 92% Accuracy (low risk): 18% to 89%

| Test result                                                                   | Quality of the Evidence (GRADE)              | Number of results per 1000 patients tested (95% CI) |                                               |                                                |             | Number of participants (studies) |
|-------------------------------------------------------------------------------|----------------------------------------------|-----------------------------------------------------|-----------------------------------------------|------------------------------------------------|-------------|----------------------------------|
|                                                                               |                                              | Prevalence 36%                                      |                                               | Prevalence 10%                                 |             |                                  |
|                                                                               |                                              | STOP- BANG Questionnaire                            | PSG or HSAT                                   | STOP- BANG Questionnaire                       | PSG or HSAT |                                  |
| <b>True positives</b><br>(patients with OSA)                                  | ⊕⊕○○<br>LOW <sup>1,2</sup>                   | 101 to 360                                          | 360 to 360                                    | 28 to 100                                      | 100 to 100  | 1056<br>(2) <sup>A,B</sup>       |
| <b>False negatives</b><br>(patients incorrectly classified as not having OSA) |                                              | 0 to 259 fewer TP in STOP-BANG Questionnaire        |                                               | 0 to 72 fewer TP in STOP-Bang Questionnaire    |             |                                  |
|                                                                               | 0 to 259                                     | 0 to 0                                              | 0 to 72                                       | 0 to 0                                         |             |                                  |
|                                                                               | 0 to 259 more FN in STOP-BANG Questionnaire  |                                                     | 0 to 72 more FN in STOP-Bang Questionnaire    |                                                |             |                                  |
| <b>True negatives</b><br>(patients without OSA)                               | ⊕⊕○○<br>LOW <sup>1,2</sup>                   | 109 to 563                                          | 640 to 640                                    | 153 to 792                                     | 900 to 900  | 1056<br>(2) <sup>A,B</sup>       |
| <b>False positives</b><br>(patients incorrectly classified as having OSA)     |                                              | 77 to 531 fewer TN in STOP-BANG Questionnaire       |                                               | 108 to 747 fewer TN in STOP-BANG Questionnaire |             |                                  |
|                                                                               | 77 to 531                                    | 0 to 0                                              | 108 to 747                                    | 0 to 0                                         |             |                                  |
|                                                                               | 77 to 531 more FP in STOP-BANG Questionnaire |                                                     | 108 to 747 more FP in STOP-BANG Questionnaire |                                                |             |                                  |

<sup>1</sup>Indirect evidence as one study consisted of pregnant women

<sup>2</sup>Wide range of specificity and sensitivity

**Figure S14—STOP Questionnaire vs. PSG to diagnose OSA in Suspected Adults (AHI ≥ 5)**

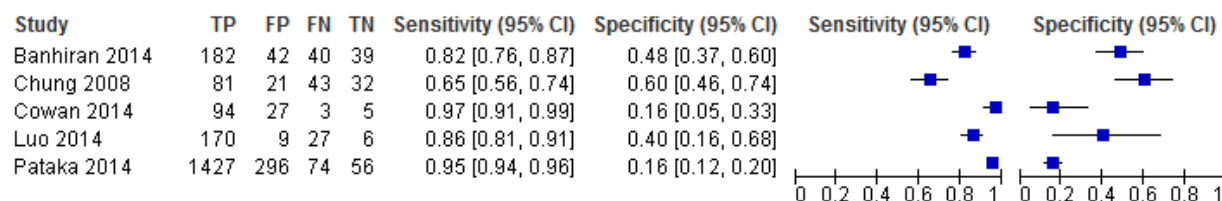

**Pooled sensitivity:** 0.88 [0.77, 0.94]

**Pooled specificity:** 0.33 [0.18, 0.52]

**LR+:** 1.31 [1.10, 1.57]

**LR-:** 0.36 [0.27, 0.47]

**DOR:** 3.68 [2.80, 4.83]

**Accuracy:** 0.78 or **78%**

**Figure S15—ROC Curve for STOP Questionnaire vs. PSG to diagnose OSA in Suspected Adults (AHI  $\geq$  5)**

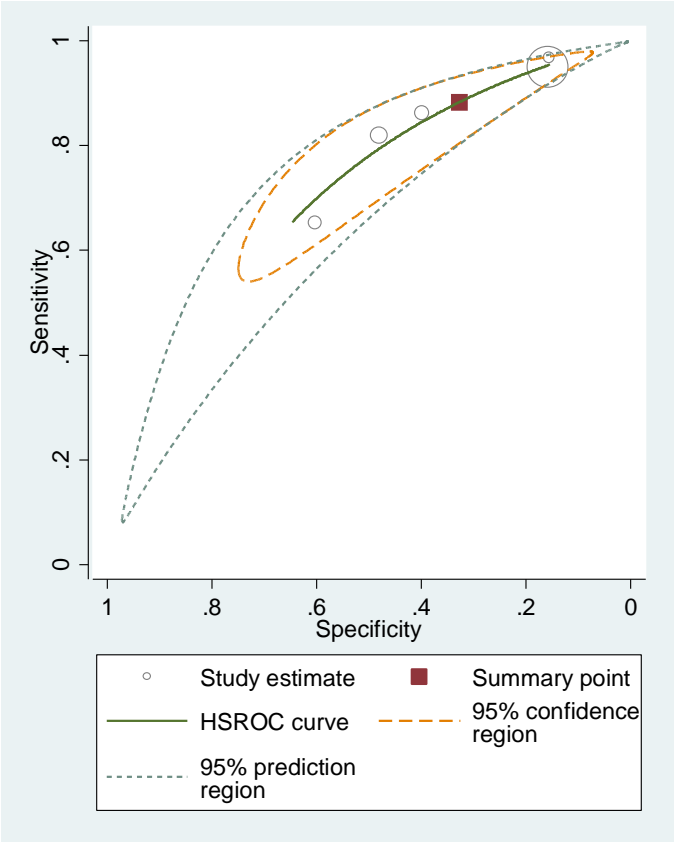

**Table S21—Summary of Findings table for STOP Questionnaire vs. PSG to diagnose OSA in Suspected Adults (AHI ≥ 5)**

**References:** Chung 2008 (A); Cowan 2014 (B); Pataka 2014 (C); Luo 2014 (D); Banhiran 2014 (E)

**Pooled sensitivity STOP Questionnaire:** 0.88 (95% CI: 0.77 to 0.94) | **Pooled specificity STOP Questionnaire:** 0.33 (95% CI: 0.18 to 0.52) | **Pooled sensitivity Attended PSG:** 1.00 (95% CI: 1.00 to 1.00) | **Pooled specificity Attended PSG:** 1.00 (95% CI: 1.00 to 1.00) | **Accuracy (high risk):** 81% (95% CI: 74 to 86%) | **Accuracy (low risk):** 63% (95% CI: 60 to 67%)

| Test result                                                                   | Quality of the Evidence (GRADE) | Number of results per 1000 patients tested (95% CI) |                  |                                           |                  | Number of participants (studies) |
|-------------------------------------------------------------------------------|---------------------------------|-----------------------------------------------------|------------------|-------------------------------------------|------------------|----------------------------------|
|                                                                               |                                 | Prevalence 87%                                      |                  | Prevalence 55%                            |                  |                                  |
|                                                                               |                                 | STOP Questionnaire                                  | Attended PSG     | STOP Questionnaire                        | Attended PSG     |                                  |
| <b>True positives</b><br>(patients with OSA)                                  |                                 | 766 (670 to 818)                                    | 870 (870 to 870) | 484 (424 to 517)                          | 550 (550 to 550) | 2674 (5) <sup>A-E</sup>          |
|                                                                               |                                 | <b>104 fewer TP in STOP Questionnaire</b>           |                  | <b>66 fewer TP in STOP Questionnaire</b>  |                  |                                  |
|                                                                               |                                 | 104 (52 to 200)                                     | 0 (0 to 0)       | 66 (33 to 126)                            | 0 (0 to 0)       |                                  |
|                                                                               |                                 | <b>104 more FN in STOP Questionnaire</b>            |                  | <b>66 more FN in STOP Questionnaire</b>   |                  |                                  |
| <b>False negatives</b><br>(patients incorrectly classified as not having OSA) |                                 | 43 (23 to 68)                                       | 130 (130 to 130) | 149 (81 to 234)                           | 450 (450 to 450) | 2674 (5) <sup>A-E</sup>          |
|                                                                               |                                 | <b>87 fewer TN in STOP Questionnaire</b>            |                  | <b>301 fewer TN in STOP Questionnaire</b> |                  |                                  |
|                                                                               |                                 | 87 (62 to 107)                                      | 0 (0 to 0)       | 301 (216 to 369)                          | 0 (0 to 0)       |                                  |
|                                                                               |                                 | <b>87 more FP in STOP Questionnaire</b>             |                  | <b>301 more FP in STOP Questionnaire</b>  |                  |                                  |

<sup>1</sup>Broad range of specificity across studies

<sup>2</sup>Wide confidence intervals for specificity

**Table S22—Summary of Findings table for STOP Questionnaire vs. PSG to diagnose OSA in Suspected Adults (AHI ≥ 15)**

**References:** Chung 2008 (A); Pataka 2014 (B); Banhiran 2014 (C); Luo 2014 (D); Cowan (E)

Range of sensitivities STOP Questionnaire: 0.62 to 0.98 | Range of specificities STOP Questionnaire: 0.10 to 0.63 | Range of sensitivities Attended PSG: 1.00 to 1.00 | Range of specificities Attended PSG: 1.00 to 1.00 | **Accuracy (high risk):** 60% to 79% | **Accuracy (low risk):** 45% to 48%

| Test result                                                                   | Quality of the Evidence (GRADE) | Number of results per 1000 patients tested (95% CI) |              |                                                  |              | Number of participants (studies) |
|-------------------------------------------------------------------------------|---------------------------------|-----------------------------------------------------|--------------|--------------------------------------------------|--------------|----------------------------------|
|                                                                               |                                 | Prevalence 64%                                      |              | Prevalence 25%                                   |              |                                  |
|                                                                               |                                 | STOP Questionnaire                                  | Attended PSG | STOP Questionnaire                               | Attended PSG |                                  |
| <b>True positives</b><br>(patients with OSA)                                  | ⊕⊕⊕○<br>MODERATE <sup>1</sup>   | 397 to 627                                          | 640 to 640   | 155 to 245                                       | 250 to 250   | 2674 <sup>A-E</sup><br>(5)       |
|                                                                               |                                 | <b>13 to 243 fewer TP in STOP Questionnaire</b>     |              | <b>5 to 95 fewer TP in STOP Questionnaire</b>    |              |                                  |
| 13 to 243                                                                     |                                 | 0 to 0                                              | 5 to 95      | 0 to 0                                           |              |                                  |
| <b>13 to 243 more FN in STOP Questionnaire</b>                                |                                 | <b>5 to 95 more FN in STOP Questionnaire</b>        |              |                                                  |              |                                  |
| <b>False negatives</b><br>(patients incorrectly classified as not having OSA) | ⊕⊕⊕○<br>MODERATE <sup>1</sup>   | 36 to 227                                           | 360 to 360   | 75 to 473                                        | 750 to 750   | 2674 <sup>A-E</sup><br>(5)       |
|                                                                               |                                 | <b>133 to 324 fewer TN in STOP Questionnaire</b>    |              | <b>277 to 675 fewer TN in STOP Questionnaire</b> |              |                                  |
| 103 to 324                                                                    |                                 | 0 to 0                                              | 277 to 675   | 0 to 0                                           |              |                                  |
| <b>133 to 324 more FP in STOP Questionnaire</b>                               |                                 | <b>277 to 675 more FP in STOP Questionnaire</b>     |              |                                                  |              |                                  |
| <b>True negatives</b><br>(patients without OSA)                               | ⊕⊕⊕○<br>MODERATE <sup>1</sup>   | 103 to 324                                          | 0 to 0       | 277 to 675                                       | 0 to 0       | 2674 <sup>A-E</sup><br>(5)       |
| <b>133 to 324 more FP in STOP Questionnaire</b>                               |                                 | <b>277 to 675 more FP in STOP Questionnaire</b>     |              |                                                  |              |                                  |
| <b>133 to 324 fewer TN in STOP Questionnaire</b>                              |                                 | <b>277 to 675 fewer TN in STOP Questionnaire</b>    |              |                                                  |              |                                  |
| <b>133 to 324 more FN in STOP Questionnaire</b>                               |                                 | <b>5 to 95 more FN in STOP Questionnaire</b>        |              |                                                  |              |                                  |
| <b>False positives</b><br>(patients incorrectly classified as having OSA)     | ⊕⊕⊕○<br>MODERATE <sup>1</sup>   | 103 to 324                                          | 0 to 0       | 277 to 675                                       | 0 to 0       | 2674 <sup>A-E</sup><br>(5)       |
| <b>133 to 324 more FP in STOP Questionnaire</b>                               |                                 | <b>277 to 675 more FP in STOP Questionnaire</b>     |              |                                                  |              |                                  |
| <b>133 to 324 fewer TN in STOP Questionnaire</b>                              |                                 | <b>277 to 675 fewer TN in STOP Questionnaire</b>    |              |                                                  |              |                                  |
| <b>133 to 324 more FN in STOP Questionnaire</b>                               |                                 | <b>5 to 95 more FN in STOP Questionnaire</b>        |              |                                                  |              |                                  |

<sup>1</sup>Wide range of values for sensitivity and specificity



**Table S23—Summary of Findings table for STOP Questionnaire vs. PSG to diagnose OSA in Suspected Adults (AHI ≥ 30)**

References: Pataka 2014 (A); Banhiran 2014 (B); Luo 2014 (C)

Range of sensitivities STOP Questionnaire: 0.91 to 0.97 | Range of specificities STOP Questionnaire: 0.11 to 0.36 | Range of sensitivities Attended PSG: 1.00 to 1.00 | Range of specificities Attended PSG: 1.00 to 1.00 | Accuracy (high risk): 48% to 49% | Accuracy (low risk): 25% to 34%

| Test result                                                                   | Quality of the Evidence (GRADE) | Number of results per 1000 patients tested (95% CI) |              |                                                  |              | Number of participants (studies) |
|-------------------------------------------------------------------------------|---------------------------------|-----------------------------------------------------|--------------|--------------------------------------------------|--------------|----------------------------------|
|                                                                               |                                 | Prevalence 36%                                      |              | Prevalence 10%                                   |              |                                  |
|                                                                               |                                 | STOP Questionnaire                                  | Attended PSG | STOP Questionnaire                               | Attended PSG |                                  |
| <b>True positives</b><br>(patients with OSA)                                  | ⊕⊕⊕○<br>MODERATE <sup>1</sup>   | 328 to 349                                          | 360 to 360   | 91 to 97                                         | 100 to 100   | 2368<br>(3) <sup>A-C</sup>       |
| <b>False negatives</b><br>(patients incorrectly classified as not having OSA) |                                 | <b>11 to 32 fewer TP in STOP Questionnaire</b>      |              | <b>3 to 9 fewer TP in STOP Questionnaire</b>     |              |                                  |
|                                                                               |                                 | 11 to 32                                            | 0 to 0       | 3 to 9                                           | 0 to 0       |                                  |
|                                                                               |                                 | <b>11 to 32 more FN in STOP Questionnaire</b>       |              | <b>3 to 9 more FN in STOP Questionnaire</b>      |              |                                  |
| <b>True negatives</b><br>(patients without OSA)                               | ⊕⊕⊕○<br>MODERATE <sup>1</sup>   | 70 to 230                                           | 640 to 640   | 99 to 324                                        | 900 to 900   | 2368<br>(3) <sup>A-C</sup>       |
| <b>False positives</b><br>(patients incorrectly classified as having OSA)     |                                 | <b>410 to 570 fewer TN in STOP Questionnaire</b>    |              | <b>576 to 801 fewer TN in STOP Questionnaire</b> |              |                                  |
|                                                                               |                                 | 410 to 570                                          | 0 to 0       | 576 to 801                                       | 0 to 0       |                                  |
|                                                                               |                                 | <b>410 to 570 more FP in STOP Questionnaire</b>     |              | <b>576 to 801 more FP in STOP Questionnaire</b>  |              |                                  |

<sup>1</sup>Wide range of values for specificity

**Table S24—Summary of Findings table for Morphometric Model vs. PSG to diagnose OSA in Suspected Adults (AHI ≥ 5)**

References: Gurubhagavatula 2013 (A); Kushida 1997 (B)

Range of sensitivities Morphometric Model: 0.88 to 0.98 | Range of specificities Morphometric Model: 0.11 to 0.31  
 Range of sensitivities Attended PSG: 1.00 to 1.00 | Range of specificities Attended PSG: 1.00 to 1.00

| Test result                                                                                                                       | Quality of the Evidence (GRADE) | Number of results per 1000 patients tested (95% CI) |              |                                                  |              | Number of participants (studies) |
|-----------------------------------------------------------------------------------------------------------------------------------|---------------------------------|-----------------------------------------------------|--------------|--------------------------------------------------|--------------|----------------------------------|
|                                                                                                                                   |                                 | Prevalence 87%                                      |              | Prevalence 55%                                   |              |                                  |
|                                                                                                                                   |                                 | Morphometric Model                                  | Attended PSG | Morphometric Model                               | Attended PSG |                                  |
| <b>True positives</b><br>(patients with OSA)<br><br><b>False negatives</b><br>(patients incorrectly classified as not having OSA) | ⊕⊕⊕○<br>MODERATE <sup>1</sup>   | 766 to 853                                          | 870 to 870   | 484 to 539                                       | 550 to 550   | 350 (2) <sup>A,B</sup>           |
|                                                                                                                                   |                                 | <b>17 to 104 fewer TP in Morphometric Model</b>     |              | <b>11 to 66 fewer TP in Morphometric Model</b>   |              |                                  |
|                                                                                                                                   |                                 | 17 to 104                                           | 0 to 0       | 11 to 66                                         | 0 to 0       |                                  |
|                                                                                                                                   |                                 | <b>17 to 104 more FN in Morphometric Model</b>      |              | <b>11 to 66 more FN in Morphometric Model</b>    |              |                                  |
| <b>True negatives</b><br>(patients without OSA)<br><br><b>False positives</b><br>(patients incorrectly classified as having OSA)  | ⊕⊕⊕○<br>MODERATE <sup>1</sup>   | 14 to 40                                            | 130 to 130   | 49 to 139                                        | 450 to 450   | 350 (2) <sup>A,B</sup>           |
|                                                                                                                                   |                                 | <b>90 to 116 fewer TN in Morphometric Model</b>     |              | <b>311 to 401 fewer TN in Morphometric Model</b> |              |                                  |
|                                                                                                                                   |                                 | 90 to 116                                           | 0 to 0       | 311 to 401                                       | 0 to 0       |                                  |
|                                                                                                                                   |                                 | <b>90 to 116 more FP in Morphometric Model</b>      |              | <b>311 to 401 more FP in Morphometric Model</b>  |              |                                  |

<sup>1</sup>Wide range of values for specificity

**Table S25—Summary of Findings table for Adjusted Neck Circumference vs. HSAT to diagnose OSA in Suspected Adults (AHI ≥ 15)**

References: Nicholl 2013 (A)

Range of sensitivities Adjusted Neck Circumference: 0.34 to 0.93 | Range of specificities Adjusted Neck Circumference: 0.37 to 0.94 Range of sensitivities HSAT: 1.00 to 1.00 | Range of specificities HSAT: 1.00 to 1.00  
Accuracy (high risk): 35% to 93% Accuracy (low risk): 36% to 94%

| Test result                                                                   | Quality of the Evidence (GRADE) | Number of results per 1000 patients tested (95% CI)      |            |                                                          |            | Number of participants (studies) |
|-------------------------------------------------------------------------------|---------------------------------|----------------------------------------------------------|------------|----------------------------------------------------------|------------|----------------------------------|
|                                                                               |                                 | Prevalence 64%                                           |            | Prevalence 25%                                           |            |                                  |
|                                                                               |                                 | Adjusted Neck Circumference                              | HSAT       | Adjusted Neck Circumference                              | HSAT       |                                  |
| <b>True positives</b><br>(patients with OSA)                                  | ⊕⊕⊕○<br>MODERATE <sup>1</sup>   | 218 to 595                                               | 640 to 640 | 85 to 233                                                | 250 to 250 | 172<br>(1) <sup>A</sup>          |
| <b>False negatives</b><br>(patients incorrectly classified as not having OSA) |                                 | <b>45 to 422 fewer TP in Adjusted Neck Circumference</b> |            | <b>17 to 165 fewer TP in Adjusted Neck Circumference</b> |            |                                  |
|                                                                               |                                 | 45 to 422                                                | 0 to 0     | 17 to 165                                                | 0 to 0     |                                  |
|                                                                               |                                 | <b>45 to 422 more FN in Adjusted Neck Circumference</b>  |            | <b>17 to 165 more FN in Adjusted Neck Circumference</b>  |            |                                  |
| <b>True negatives</b><br>(patients without OSA)                               | ⊕⊕⊕○<br>MODERATE <sup>1</sup>   | 133 to 338                                               | 360 to 360 | 277 to 705                                               | 750 to 750 | 172<br>(1) <sup>A</sup>          |
| <b>False positives</b><br>(patients incorrectly classified as having OSA)     |                                 | <b>22 to 227 fewer TN in Adjusted Neck Circumference</b> |            | <b>45 to 473 fewer TN in Adjusted Neck Circumference</b> |            |                                  |
|                                                                               |                                 | 22 to 227                                                | 0 to 0     | 45 to 473                                                | 0 to 0     |                                  |
|                                                                               |                                 | <b>22 to 227 more FP in Adjusted Neck Circumference</b>  |            | <b>45 to 473 more FP in Adjusted Neck Circumference</b>  |            |                                  |

<sup>1</sup>Wide range of values for specificity and sensitivity

**Table S26—Summary of Findings table for Adjusted Neck Circumference vs. HSAT to diagnose OSA in Suspected Adults (AHI ≥ 30)**

References: Nicholl 2013 (A); Gurubhagavatula 2013 (B)

Range of sensitivities Adjusted Neck Circumference: 0.40 to 0.96 | Range of specificities Adjusted Neck Circumference: 0.32 to 0.92 | Range of sensitivities HSAT: 1.00 to 1.00 | Range of specificities HSAT: 1.00 to 1.00  
Accuracy (high risk): 35% to 94% | Accuracy (low risk): 33% to 92%

| Test result                                                                   | Quality of the Evidence (GRADE) | Number of results per 1000 patients tested (95% CI)      |            |                                                          |            | Number of participants (studies) |
|-------------------------------------------------------------------------------|---------------------------------|----------------------------------------------------------|------------|----------------------------------------------------------|------------|----------------------------------|
|                                                                               |                                 | Prevalence 36%                                           |            | Prevalence 10%                                           |            |                                  |
|                                                                               |                                 | Adjusted Neck Circumference                              | HSAT       | Adjusted Neck Circumference                              | HSAT       |                                  |
| <b>True positives</b><br>(patients with OSA)                                  | ⊕⊕⊕○<br>MODERATE <sup>1,2</sup> | 144 to 346                                               | 360 to 360 | 40 to 96                                                 | 100 to 100 | 422<br>(2) <sup>A,B</sup>        |
| <b>False negatives</b><br>(patients incorrectly classified as not having OSA) |                                 | 14 to 216                                                | 0 to 0     | 4 to 60                                                  | 0 to 0     |                                  |
|                                                                               |                                 | <b>14 to 216 fewer TP in Adjusted Neck Circumference</b> |            | <b>4 to 60 fewer TP in Adjusted Neck Circumference</b>   |            |                                  |
|                                                                               |                                 | <b>14 to 216 more FN in Adjusted Neck Circumference</b>  |            | <b>4 to 60 more FN in Adjusted Neck Circumference</b>    |            |                                  |
| <b>True negatives</b><br>(patients without OSA)                               | ⊕⊕⊕○<br>MODERATE <sup>1</sup>   | 205 to 589                                               | 640 to 640 | 288 to 828                                               | 900 to 900 | 422<br>(2) <sup>A,B</sup>        |
| <b>False positives</b><br>(patients incorrectly classified as having OSA)     |                                 | 51 to 435                                                | 0 to 0     | 72 to 612                                                | 0 to 0     |                                  |
|                                                                               |                                 | <b>51 to 435 fewer TN in Adjusted Neck Circumference</b> |            | <b>72 to 612 fewer TN in Adjusted Neck Circumference</b> |            |                                  |
|                                                                               |                                 | <b>51 to 435 more FP in Adjusted Neck Circumference</b>  |            | <b>72 to 612 more FP in Adjusted Neck Circumference</b>  |            |                                  |

<sup>1</sup>Wide range of values for specificity and sensitivity

**Table S27—Summary of Findings table for Multivariable Apnea Prediction (MAP) vs. PSG to diagnose OSA in Suspected Adults (AHI ≥ 5)**

**References:** Gurubhagavatula 2001 (A); Gurubhagavatula 2013 (B); Rofail 2010 (C); Wilson 2014 (D)

**Range of sensitivities MAP:** 0.68 to 0.85 | **Range of specificities MAP:** 0.56 to 0.92 **Range of sensitivities Attended PSG:** 1.00 to 1.00 | **Range of specificities Attended PSG:** 1.00 to 1.00 **Accuracy (high risk):** 66% to 81% **Accuracy (low risk):** 63% to 79%

| Test result                                                                   | Quality of the Evidence (GRADE) | Number of results per 1000 patients tested (95% CI) |              |                                  |              | Number of participants (studies) |
|-------------------------------------------------------------------------------|---------------------------------|-----------------------------------------------------|--------------|----------------------------------|--------------|----------------------------------|
|                                                                               |                                 | Prevalence 87%                                      |              | Prevalence 55%                   |              |                                  |
|                                                                               |                                 | MAP                                                 | Attended PSG | MAP                              | Attended PSG |                                  |
| <b>True positives</b><br>(patients with OSA)                                  | ⊕⊕⊕○<br>MODERATE <sup>1</sup>   | 592 to 739                                          | 870 to 870   | 374 to 468                       | 550 to 550   | 683 <sup>A-D</sup><br>(4)        |
|                                                                               |                                 | <b>131 to 278 fewer TP in MAP</b>                   |              | <b>82 to 176 fewer TP in MAP</b> |              |                                  |
| <b>False negatives</b><br>(patients incorrectly classified as not having OSA) |                                 | 131 to 278                                          | 0 to 0       | 82 to 170                        | 0 to 0       |                                  |
|                                                                               |                                 | <b>131 to 278 more FN in MAP</b>                    |              | <b>82 to 176 more FN in MAP</b>  |              |                                  |
| <b>True negatives</b><br>(patients without OSA)                               | ⊕⊕⊕○<br>MODERATE <sup>1</sup>   | 73 to 120                                           | 130 to 130   | 252 to 414                       | 450 to 450   | 683 <sup>A-D</sup><br>(4)        |
|                                                                               |                                 | <b>10 to 57 fewer TN in MAP</b>                     |              | <b>36 to 198 fewer TN in MAP</b> |              |                                  |
| <b>False positives</b><br>(patients incorrectly classified as having OSA)     |                                 | 10 to 57                                            | 0 to 0       | 36 to 198                        | 0 to 0       |                                  |
|                                                                               |                                 | <b>10 to 57 more FP in MAP</b>                      |              | <b>36 to 198 more FP in MAP</b>  |              |                                  |

<sup>1</sup>Wide range of values for specificity and sensitivity

**Table S28—MAP vs. PSG to diagnose OSA in Suspected Adults (AHI ≥ 30)**

**References:** Gurubhagavatula 2001 (A); Gurubhagavatula 2013 (B); Morales 2012 (C); Wilson 2014 (D)

**Range of sensitivities MAP:** 0.80 to 0.90 | **Range of specificities MAP:** 0.44 to 0.72 **Range of sensitivities Attended PSG:** 1.00 to 1.00 | **Range of specificities Attended PSG:** 1.00 to 1.00 **Accuracy (high risk):** 58% to 70% **Accuracy (low risk):** 50% to 50%

| Test result                                                                   | Quality of the Evidence (GRADE) | Number of results per 1000 patients tested (95% CI) |              |                                   |              | Number of participants (studies) |
|-------------------------------------------------------------------------------|---------------------------------|-----------------------------------------------------|--------------|-----------------------------------|--------------|----------------------------------|
|                                                                               |                                 | Prevalence 36%                                      |              | Prevalence 10%                    |              |                                  |
|                                                                               |                                 | MAP                                                 | Attended PSG | MAP                               | Attended PSG |                                  |
| <b>True positives</b><br>(patients with OSA)                                  | ⊕⊕⊕○<br>MODERATE <sup>1</sup>   | 288 to 360                                          | 360 to 360   | 80 to 100                         | 100 to 100   | 436<br>(4) <sup>A-D</sup>        |
| <b>False negatives</b><br>(patients incorrectly classified as not having OSA) |                                 | <b>0 to 72 fewer TP in MAP</b>                      |              | <b>10 to 20 fewer TP in MAP</b>   |              |                                  |
|                                                                               |                                 | 0 to 72                                             | 0 to 0       | 0 to 20                           | 0 to 0       |                                  |
|                                                                               |                                 | <b>36 to 72 more FN in MAP</b>                      |              | <b>0 to 20 more FN in MAP</b>     |              |                                  |
| <b>True negatives</b><br>(patients without OSA)                               | ⊕⊕⊕○<br>MODERATE <sup>1</sup>   | 122 to 461                                          | 640 to 640   | 171 to 648                        | 900 to 900   | 436<br>(4) <sup>A-D</sup>        |
| <b>False positives</b><br>(patients incorrectly classified as having OSA)     |                                 | <b>179 to 518 fewer TN in MAP</b>                   |              | <b>252 to 729 fewer TN in MAP</b> |              |                                  |
|                                                                               |                                 | 179 to 518                                          | 0 to 0       | 252 to 729                        | 0 to 0       |                                  |
|                                                                               |                                 | <b>179 to 518 more FP in MAP</b>                    |              | <b>252 to 729 more FP in MAP</b>  |              |                                  |

<sup>1</sup>Wide range of values for specificity

**Table S29—Summary of Findings table for Prediction Models vs. PSG to diagnose OSA in Suspected Adults (AHI ≥ 5)**

References: Chang 2014 (A); Zou 2013 (B)

Range of sensitivities Prediction Models: 0.33 to 0.90 | Range of specificities Prediction Models: 0.50 to 1.00  
 Range of sensitivities Attended PSG: 1.00 to 1.00 | Range of specificities Attended PSG: 1.00 to 1.00 Accuracy (high risk): 58% to 80% Accuracy (low risk): 61% to 88%

| Test result                                                                   | Quality of the Evidence (GRADE) | Number of results per 1000 patients tested (95% CI) |              |                                                |              | Number of participants (studies) |
|-------------------------------------------------------------------------------|---------------------------------|-----------------------------------------------------|--------------|------------------------------------------------|--------------|----------------------------------|
|                                                                               |                                 | Prevalence 87%                                      |              | Prevalence 55%                                 |              |                                  |
|                                                                               |                                 | Prediction Models                                   | Attended PSG | Prediction Models                              | Attended PSG |                                  |
| <b>True positives</b><br>(patients with OSA)                                  | ⊕⊕⊕○<br>MODERATE <sup>1</sup>   | 287 to 783                                          | 870 to 870   | 182 to 495                                     | 550 to 550   | 1089<br>(2) <sup>A,B</sup>       |
| <b>False negatives</b><br>(patients incorrectly classified as not having OSA) |                                 | <b>87 to 583 fewer TP in Prediction Models</b>      |              | <b>55 to 368 fewer TP in Prediction Models</b> |              |                                  |
|                                                                               |                                 | 87 to 583                                           | 0 to 0       | 55 to 368                                      | 0 to 0       |                                  |
|                                                                               |                                 | <b>87 to 583 more FN in Prediction Models</b>       |              | <b>55 to 368 more FN in Prediction Models</b>  |              |                                  |
| <b>True negatives</b><br>(patients without OSA)                               | ⊕⊕⊕○<br>MODERATE <sup>1</sup>   | 65 to 130                                           | 130 to 130   | 225 to 450                                     | 450 to 450   | 1089<br>(2) <sup>A,B</sup>       |
| <b>False positives</b><br>(patients incorrectly classified as having OSA)     |                                 | <b>0 to 65 fewer TN in Prediction Models</b>        |              | <b>0 to 225 fewer TN in Prediction Models</b>  |              |                                  |
|                                                                               |                                 | 0 to 65                                             | 0 to 0       | 0 to 225                                       | 0 to 0       |                                  |
|                                                                               |                                 | <b>0 to 65 more FP in Prediction Models</b>         |              | <b>0 to 225 more FP in Prediction Models</b>   |              |                                  |

<sup>1</sup>Wide values of sensitivity and specificity

**Table S30—Summary of Findings table for Prediction Models vs. PSG to diagnose OSA in Suspected Adults (AHI ≥ 15)**

References: Sharma 2006 (A); Zerah-Lancner 2000 (B)

Range of sensitivities Prediction Models: 0.82 to 1.00 | Range of specificities Prediction Models: 0.84 to 0.91 Range of sensitivities Attended PSG: 1.00 to 1.00 | Range of specificities Attended PSG: 1.00 to 1.00 Accuracy (high risk): 85% to 96% Accuracy (low risk): 85% to 92%

| Test result                                                                   | Quality of the Evidence (GRADE) | Number of results per 1000 patients tested (95% CI) |              |                                                |              | Number of participants (studies) |
|-------------------------------------------------------------------------------|---------------------------------|-----------------------------------------------------|--------------|------------------------------------------------|--------------|----------------------------------|
|                                                                               |                                 | Prevalence 64%                                      |              | Prevalence 25%                                 |              |                                  |
|                                                                               |                                 | Prediction Models                                   | Attended PSG | Prediction Models                              | Attended PSG |                                  |
| <b>True positives</b><br>(patients with OSA)                                  | ⊕⊕⊕⊕<br>HIGH                    | 525 to 640                                          | 640 to 640   | 205 to 250                                     | 250 to 250   | 287<br>(2) <sup>A,B</sup>        |
| <b>False negatives</b><br>(patients incorrectly classified as not having OSA) |                                 | <b>0 to 115 fewer TP in Prediction Models</b>       |              | <b>0 to 45 fewer TP in Prediction Models</b>   |              |                                  |
|                                                                               |                                 | 0 to 115                                            | 0 to 0       | 0 to 45                                        | 0 to 0       |                                  |
|                                                                               |                                 | <b>0 to 115 more FN in Prediction Models</b>        |              | <b>0 to 45 more FN in Prediction Models</b>    |              |                                  |
| <b>True negatives</b><br>(patients without OSA)                               | ⊕⊕⊕⊕<br>HIGH                    | 302 to 328                                          | 360 to 360   | 630 to 683                                     | 750 to 750   | 287<br>(2) <sup>A,B</sup>        |
| <b>False positives</b><br>(patients incorrectly classified as having OSA)     |                                 | <b>32 to 58 fewer TN in Prediction Models</b>       |              | <b>67 to 120 fewer TN in Prediction Models</b> |              |                                  |
|                                                                               |                                 | 32 to 58                                            | 0 to 0       | 67 to 120                                      | 0 to 0       |                                  |
|                                                                               |                                 | <b>32 to 58 more FP in Prediction Models</b>        |              | <b>67 to 120 more FP in Prediction Models</b>  |              |                                  |



**Table S31—Summary of Findings table for Prediction Models vs. HSAT to diagnose OSA in Suspected Adults (AHI ≥ 30)**

References: Platt 2013 (A); Morales 2012 (B); Kolotkin 2011 (C)

Range of sensitivities Prediction Models: 0.76 to 0.97 | Range of specificities Prediction Models: 0.19 to 0.75 Range of sensitivities Attended PSG: 1.00 to 1.00 | Range of specificities Attended PSG: 1.00 to 1.00 Accuracy (high risk): 58% to 70% Accuracy (low risk): 51% to 52%

| Test result                                                                   | Quality of the Evidence (GRADE) | Number of results per 1000 patients tested (95% CI) |                                                 |                   |            | Number of participants (studies) |
|-------------------------------------------------------------------------------|---------------------------------|-----------------------------------------------------|-------------------------------------------------|-------------------|------------|----------------------------------|
|                                                                               |                                 | Prevalence 36%                                      |                                                 | Prevalence 10%    |            |                                  |
|                                                                               |                                 | Prediction Models                                   | HSAT                                            | Prediction Models | HSAT       |                                  |
| <b>True positives</b><br>(patients with OSA)                                  | ⊕⊕⊕○<br>MODERATE <sup>1</sup>   | 274 to 349                                          | 360 to 360                                      | 76 to 97          | 100 to 100 | 697<br>(3) <sup>A-C</sup>        |
| <b>False negatives</b><br>(patients incorrectly classified as not having OSA) |                                 | <b>11 to 86 fewer TP in Prediction Models</b>       | <b>3 to 24 fewer TP in Prediction Models</b>    |                   |            |                                  |
|                                                                               |                                 | 11 to 86                                            | 0 to 0                                          | 3 to 24           | 0 to 0     |                                  |
|                                                                               |                                 | <b>11 to 86 more FN in Prediction Models</b>        | <b>3 to 24 more FN in Prediction Models</b>     |                   |            |                                  |
| <b>True negatives</b><br>(patients without OSA)                               | ⊕⊕⊕○<br>MODERATE <sup>1</sup>   | 122 to 480                                          | 640 to 640                                      | 171 to 675        | 900 to 900 | 697<br>(3) <sup>A-C</sup>        |
| <b>False positives</b><br>(patients incorrectly classified as having OSA)     |                                 | <b>160 to 518 fewer TN in Prediction Models</b>     | <b>225 to 729 fewer TN in Prediction Models</b> |                   |            |                                  |
|                                                                               |                                 | 160 to 518                                          | 0 to 0                                          | 225 to 729        | 0 to 0     |                                  |
|                                                                               |                                 | <b>160 to 518 more FP in Prediction Models</b>      | <b>225 to 729 more FP in Prediction Models</b>  |                   |            |                                  |

<sup>1</sup>Wide range of values for specificity

**Table S32—Summary of Findings table for OSA 50 vs. PSG to diagnose OSA in Suspected Adults (AHI ≥ 15)**

References: Firat 2012 (A)

**Single study sensitivity OSA 50:** 0.63 (95% CI: 0.49 to 0.77) | **Single study specificity OSA 50:** 0.82 (95% CI: 0.70 to 0.94)  
**Single study sensitivity Attended PSG:** 1.00 (95% CI: 1.00 to 1.00) | **Single study specificity Attended PSG:** 1.00 (95% CI: 1.00 to 1.00) **Accuracy (high risk):** 70% (95% CI: 57 to 83%) **Accuracy (low risk):** 77% (95% CI: 65 to 90%)

| Test result                                     | Quality of the Evidence (GRADE) | Number of results per 1000 patients tested (95% CI) |                  |                               |                  | Number of participants (studies) |
|-------------------------------------------------|---------------------------------|-----------------------------------------------------|------------------|-------------------------------|------------------|----------------------------------|
|                                                 |                                 | Prevalence 64%                                      |                  | Prevalence 25%                |                  |                                  |
|                                                 |                                 | OSA 50                                              | Attended PSG     | OSA 50                        | Attended PSG     |                                  |
| <b>True positives</b><br>(patients with OSA)    | ⊕⊕○○<br>LOW <sup>1,2</sup>      | 403 (314 to 493)                                    | 640 (640 to 640) | 158 (123 to 193)              | 250 (250 to 250) | 85<br>(1) <sup>A</sup>           |
|                                                 |                                 | <b>237 fewer TP in OSA 50</b>                       |                  | <b>92 fewer TP in OSA 50</b>  |                  |                                  |
|                                                 |                                 | 237 (147 to 326)                                    | 0 (0 to 0)       | 92 (57 to 127)                | 0 (0 to 0)       |                                  |
|                                                 |                                 | <b>237 more FN in OSA 50</b>                        |                  | <b>92 more FN in OSA 50</b>   |                  |                                  |
| <b>True negatives</b><br>(patients without OSA) | ⊕⊕○○<br>LOW <sup>1,2</sup>      | 295 (252 to 338)                                    | 360 (360 to 360) | 615 (525 to 705)              | 750 (750 to 750) | 85<br>(1) <sup>A</sup>           |
|                                                 |                                 | <b>65 fewer TN in OSA 50</b>                        |                  | <b>135 fewer TN in OSA 50</b> |                  |                                  |
|                                                 |                                 | 65 (22 to 108)                                      | 0 (0 to 0)       | 135 (45 to 225)               | 0 (0 to 0)       |                                  |
|                                                 |                                 | <b>65 more FP in OSA 50</b>                         |                  | <b>135 more FP in OSA 50</b>  |                  |                                  |

<sup>1</sup>Indirect evidence as study only included highway bus drivers

<sup>2</sup>Wide confidence intervals for sensitivity and specificity

**Table S33—Summary of Findings table for OSA 50 vs. HSAT to diagnose OSA in Suspected Adults (AHI ≥ 30)**

References: Chai-Coetzer 2011 (A)

Single study sensitivity OSA 50: 0.88 (95% CI: 0.60 to 0.98) | Single study specificity OSA 50: 0.82 (95% CI: 0.70 to 0.90)  
 Single study sensitivity HSAT: 1.00 (95% CI: 1.00 to 1.00) | Single study specificity HSAT: 1.00 (95% CI: 1.00 to 1.00)  
 Accuracy (high risk): 84% (95% CI: 66 to 93%) Accuracy (low risk):83% (95% CI: 69 to 91%)

| Test result                                                                   | Quality of the Evidence (GRADE) | Number of results per 1000 patients tested (95% CI) |                  |                               |                  | Number of participants (studies) |
|-------------------------------------------------------------------------------|---------------------------------|-----------------------------------------------------|------------------|-------------------------------|------------------|----------------------------------|
|                                                                               |                                 | Prevalence 36%                                      |                  | Prevalence 10%                |                  |                                  |
|                                                                               |                                 | OSA 50                                              | HSAT             | OSA 50                        | HSAT             |                                  |
| <b>True positives</b><br>(patients with OSA)                                  | ⊕⊕⊕○<br>MODERATE <sup>1</sup>   | 317 (216 to 353)                                    | 360 (360 to 360) | 88 (60 to 98)                 | 100 (100 to 100) | 78<br>(1) <sup>A</sup>           |
|                                                                               |                                 | <b>43 fewer TP in OSA 50</b>                        |                  | <b>12 fewer TP in OSA 50</b>  |                  |                                  |
| <b>False negatives</b><br>(patients incorrectly classified as not having OSA) |                                 | 43 (7 to 144)                                       | 0 (0 to 0)       | 12 (2 to 40)                  | 0 (0 to 0)       |                                  |
|                                                                               |                                 | <b>43 more FN in OSA 50</b>                         |                  | <b>12 more FN in OSA 50</b>   |                  |                                  |
| <b>True negatives</b><br>(patients without OSA)                               | ⊕⊕⊕○<br>MODERATE <sup>1</sup>   | 525 (448 to 576)                                    | 640 (640 to 640) | 738 (630 to 810)              | 900 (900 to 900) | 78<br>(1) <sup>A</sup>           |
|                                                                               |                                 | <b>115 fewer TN in OSA 50</b>                       |                  | <b>162 fewer TN in OSA 50</b> |                  |                                  |
| <b>False positives</b><br>(patients incorrectly classified as having OSA)     |                                 | 115 (64 to 192)                                     | 0 (0 to 0)       | 162 (90 to 270)               | 0 (0 to 0)       |                                  |
|                                                                               |                                 | <b>115 more FP in OSA 50</b>                        |                  | <b>162 more FP in OSA 50</b>  |                  |                                  |

<sup>1</sup>Wide confidence intervals for sensitivity and specificity

**Table S34—Summary of Findings table for Clinical Decision Support System vs. PSG to diagnose OSA in Suspected Adults (AHI ≥ 5)**

References: LaPorta 2012 (A)

Single study sensitivity Clinical Decision Support System: 0.98 (95% CI: 0.92 to 1.00) | Single study specificity Clinical Decision Support System: 0.87 (95% CI: 0.66 to 0.97) | Single study sensitivity Attended PSG: 1.00 (95% CI: 1.00 to 1.00) | Single study specificity Attended PSG: 1.00 (95% CI: 1.00 to 1.00) | Accuracy (high risk): 97% (95% CI: 89 to 100%) | Accuracy (low risk): 93% (95% CI: 80 to 99%)

| Test result                                                                   | Quality of the Evidence (GRADE)                                                                          | Number of results per 1000 patients tested (95% CI)    |                  |                                                        |                  | Number of participants (studies) |
|-------------------------------------------------------------------------------|----------------------------------------------------------------------------------------------------------|--------------------------------------------------------|------------------|--------------------------------------------------------|------------------|----------------------------------|
|                                                                               |                                                                                                          | Prevalence 87%                                         |                  | Prevalence 55%                                         |                  |                                  |
|                                                                               |                                                                                                          | Clinical Decision Support System                       | Attended PSG     | Clinical Decision Support System                       | Attended PSG     |                                  |
| <b>True positives</b><br>(patients with OSA)                                  | <br>LOW <sup>1,2</sup>  | 853 (800 to 870)                                       | 870 (870 to 870) | 539 (506 to 550)                                       | 550 (550 to 550) | 91 (1) <sup>A</sup>              |
|                                                                               |                                                                                                          | <b>17 fewer TP in Clinical Decision Support System</b> |                  | <b>11 fewer TP in Clinical Decision Support System</b> |                  |                                  |
|                                                                               |                                                                                                          | 17 (0 to 70)                                           | 0 (0 to 0)       | 11 (0 to 44)                                           | 0 (0 to 0)       |                                  |
|                                                                               |                                                                                                          | <b>17 more FN in Clinical Decision Support System</b>  |                  | <b>11 more FN in Clinical Decision Support System</b>  |                  |                                  |
| <b>False negatives</b><br>(patients incorrectly classified as not having OSA) | <br>LOW <sup>1,2</sup> | 113 (86 to 126)                                        | 130 (130 to 130) | 391 (297 to 436)                                       | 450 (450 to 450) | 91 (1) <sup>A</sup>              |
|                                                                               |                                                                                                          | <b>17 fewer TN in Clinical Decision Support System</b> |                  | <b>59 fewer TN in Clinical Decision Support System</b> |                  |                                  |
|                                                                               |                                                                                                          | 17 (4 to 44)                                           | 0 (0 to 0)       | 59 (14 to 153)                                         | 0 (0 to 0)       |                                  |
|                                                                               |                                                                                                          | <b>17 more FP in Clinical Decision Support System</b>  |                  | <b>59 more FP in Clinical Decision Support System</b>  |                  |                                  |

<sup>1</sup>Indirect evidence as study only included patients with ischemic heart disease

<sup>2</sup>Wide confidence intervals for specificity

**Table S35—Summary of Findings table for (Obstructive Sleep Apnea Hypopnea Syndrome) OSAHS Score vs. PSG to diagnose OSA in Suspected Adults (AHI ≥ 5)**

References: Friedman 2010 (A)

Single study sensitivity OSAHS Score: 0.86 (95% CI: 0.80 to 0.91) | Single study specificity OSAHS Score: 0.47 (95% CI: 0.34 to 0.56) | Single study sensitivity Attended PSG: 1.00 (95% CI: 1.00 to 1.00) | Single study specificity Attended PSG: 1.00 (95% CI: 1.00 to 1.00) Accuracy (high risk): 81% (95% CI: 74 to 86%) Accuracy (low risk): 68% (95% CI: 59 to 75%)

| Test result                                                         | Quality of the Evidence (GRADE) | Number of results per 1000 patients tested (95% CI) |                  |                                    |                  | Number of participants (studies) |
|---------------------------------------------------------------------|---------------------------------|-----------------------------------------------------|------------------|------------------------------------|------------------|----------------------------------|
|                                                                     |                                 | Prevalence 87%                                      |                  | Prevalence 55%                     |                  |                                  |
|                                                                     |                                 | OSAHS Score                                         | Attended PSG     | OSAHS Score                        | Attended PSG     |                                  |
| True positives (patients with OSA)                                  | ⊕⊕⊕○<br>MODERATE <sup>1</sup>   | 748 (696 to 792)                                    | 870 (870 to 870) | 473 (440 to 501)                   | 550 (550 to 550) | 223 <sup>A</sup><br>(1)          |
|                                                                     |                                 | <b>122 fewer TP in OSAHS Score</b>                  |                  | <b>77 fewer TP in OSAHS Score</b>  |                  |                                  |
|                                                                     |                                 | 122 (78 to 174)                                     | 0 (0 to 0)       | 77 (49 to 110)                     | 0 (0 to 0)       |                                  |
| False negatives (patients incorrectly classified as not having OSA) | ⊕⊕⊕○<br>MODERATE <sup>1</sup>   | <b>122 more FN in OSAHS Score</b>                   |                  | <b>77 more FN in OSAHS Score</b>   |                  | 223 <sup>A</sup><br>(1)          |
|                                                                     |                                 | 61 (44 to 73)                                       | 130 (130 to 130) | 211 (153 to 252)                   | 450 (450 to 450) |                                  |
|                                                                     |                                 | <b>69 fewer TN in OSAHS Score</b>                   |                  | <b>239 fewer TN in OSAHS Score</b> |                  |                                  |
| True negatives (patients without OSA)                               | ⊕⊕⊕○<br>MODERATE <sup>1</sup>   | 69 (57 to 86)                                       | 0 (0 to 0)       | 239 (198 to 297)                   | 0 (0 to 0)       | 223 <sup>A</sup><br>(1)          |
|                                                                     |                                 | <b>69 more FP in OSAHS Score</b>                    |                  | <b>239 more FP in OSAHS Score</b>  |                  |                                  |

<sup>1</sup>Wide confidence intervals for specificity

**Table S36—Summary of Findings table for Kushida Index vs. PSG to diagnose OSA in Suspected Adults (AHI ≥ 5)**

References: Kushida 1997 (A)

Single study sensitivity Kushida Index: 0.98 (95% CI: 0.95 to 0.99) | Single study specificity Kushida Index: 1.00 (95% CI: 0.92 to 1.00) | Single study sensitivity Attended PSG: 1.00 (95% CI: 1.00 to 1.00) | Single study specificity Attended PSG: 1.00 (95% CI: 1.00 to 1.00) Accuracy (high risk): 98% (95% CI: 95 to 99%) Accuracy (low risk): 99% (95% CI: 94 to 100%)

| Test result                                     | Quality of the Evidence (GRADE) | Number of results per 1000 patients tested (95% CI) |                  |                                     |                  | Number of participants (studies) |
|-------------------------------------------------|---------------------------------|-----------------------------------------------------|------------------|-------------------------------------|------------------|----------------------------------|
|                                                 |                                 | Prevalence 87%                                      |                  | Prevalence 55%                      |                  |                                  |
|                                                 |                                 | Kushida Index                                       | Attended PSG     | Kushida Index                       | Attended PSG     |                                  |
| <b>True positives</b><br>(patients with OSA)    | ⊕⊕⊕⊕<br>HIGH                    | 853 (827 to 861)                                    | 870 (870 to 870) | 539 (523 to 545)                    | 550 (550 to 550) | 301 <sup>A</sup><br>(1)          |
|                                                 |                                 | <b>17 fewer TP in Kushida Index</b>                 |                  | <b>11 fewer TP in Kushida Index</b> |                  |                                  |
|                                                 |                                 | 17 (9 to 43)                                        | 0 (0 to 0)       | 11 (5 to 27)                        | 0 (0 to 0)       |                                  |
|                                                 |                                 | <b>17 more FN in Kushida Index</b>                  |                  | <b>11 more FN in Kushida Index</b>  |                  |                                  |
| <b>True negatives</b><br>(patients without OSA) | ⊕⊕⊕⊕<br>HIGH                    | 130 (120 to 130)                                    | 130 (130 to 130) | 450 (414 to 450)                    | 450 (450 to 450) | 301 <sup>A</sup><br>(1)          |
|                                                 |                                 | <b>0 fewer TN in Kushida Index</b>                  |                  | <b>0 fewer TN in Kushida Index</b>  |                  |                                  |
|                                                 |                                 | 0 (0 to 10)                                         | 0 (0 to 0)       | 0 (0 to 36)                         | 0 (0 to 0)       |                                  |
|                                                 |                                 | <b>0 fewer FP in Kushida Index</b>                  |                  | <b>0 fewer FP in Kushida Index</b>  |                  |                                  |

# Home sleep apnea testing for the diagnosis of obstructive sleep apnea in adults

**Table S37—Summary of Findings table for Type 2 HSAT vs. PSG to diagnose OSA in Suspected Adults (AHI ≥ 5)**

References: Campbell 2011 (A); Banhiran 2014 (B)

Range of sensitivities Type 2 HSAT: 0.88 to 0.97 | Range of specificities Type 2 HSAT: 0.50 to 0.56  
 Range of sensitivities Attended: 1.00 to 1.00 | Range of specificities Attended: 1.00 to 1.00 Accuracy (high risk): 84% to 91% Accuracy (low risk): 73% to 77%

| Test result                                                                   | Quality of the Evidence (GRADE) | Number of results per 1000 patients tested (95% CI) |            |                                           |            | Number of participants (studies) |
|-------------------------------------------------------------------------------|---------------------------------|-----------------------------------------------------|------------|-------------------------------------------|------------|----------------------------------|
|                                                                               |                                 | Prevalence 87%                                      |            | Prevalence 55%                            |            |                                  |
|                                                                               |                                 | Type 2 HSAT                                         | Attended   | Type 2 HSAT                               | Attended   |                                  |
| <b>True positives</b><br>(patients with OSA)                                  | ⊕⊕⊕⊕<br>HIGH                    | 766 to 844                                          | 870 to 870 | 484 to 534                                | 550 to 550 | 116 <sup>A,B</sup><br>(2)        |
| <b>False negatives</b><br>(patients incorrectly classified as not having OSA) |                                 | <b>26 to 104 fewer TP in Type 2 HSAT</b>            |            | <b>16 to 66 fewer TP in Type 2 HSAT</b>   |            |                                  |
|                                                                               |                                 | 26 to 104                                           | 0 to 0     | 16 to 66                                  | 0 to 0     |                                  |
|                                                                               |                                 | <b>26 to 104 more FN in Type 2 HSAT</b>             |            | <b>16 to 66 more FN in Type 2 HSAT</b>    |            |                                  |
| <b>True negatives</b><br>(patients without OSA)                               | ⊕⊕⊕⊕<br>HIGH                    | 65 to 73                                            | 130 to 130 | 225 to 252                                | 450 to 450 | 116 <sup>A,B</sup><br>(2)        |
| <b>False positives</b><br>(patients incorrectly classified as having OSA)     |                                 | <b>57 to 65 fewer TN in Type 2 HSAT</b>             |            | <b>198 to 225 fewer TN in Type 2 HSAT</b> |            |                                  |
|                                                                               |                                 | 57 to 65                                            | 0 to 0     | 198 to 225                                | 0 to 0     |                                  |
|                                                                               |                                 | <b>57 to 65 more FP in Type 2 HSAT</b>              |            | <b>198 to 225 more FP in Type 2 HSAT</b>  |            |                                  |

**Table S38—Summary of Findings table for Type 2 HSAT vs. PSG to diagnose OSA in Suspected Adults (AHI ≥ 15)**

References: Campbell 2011 (A); Banhiran 2014 (B)

Range of sensitivities Type 2 HSAT: 0.94 to 0.95 | Range of specificities Type 2 HSAT: 0.76 to 0.77  
 Range of sensitivities Attended: 1.00 to 1.00 | Range of specificities Attended: 1.00 to 1.00 Accuracy (high risk): 88% to 88% Accuracy (low risk): 81% to 81%

| Test result                                                                                                                       | Quality of the Evidence (GRADE) | Number of results per 1000 patients tested (95% CI) |            |                                           |            | Number of participants (studies) |
|-----------------------------------------------------------------------------------------------------------------------------------|---------------------------------|-----------------------------------------------------|------------|-------------------------------------------|------------|----------------------------------|
|                                                                                                                                   |                                 | Prevalence 64%                                      |            | Prevalence 25%                            |            |                                  |
|                                                                                                                                   |                                 | Type 2 HSAT                                         | Attended   | Type 2 HSAT                               | Attended   |                                  |
| <b>True positives</b><br>(patients with OSA)<br><br><b>False negatives</b><br>(patients incorrectly classified as not having OSA) | ⊕⊕⊕⊕<br>HIGH                    | 602 to 608                                          | 640 to 640 | 235 to 238                                | 250 to 250 | 116 <sup>A,B</sup><br>(2)        |
|                                                                                                                                   |                                 | <b>32 to 38 fewer TP in Type 2 HSAT</b>             |            | <b>12 to 15 fewer TP in Type 2 HSAT</b>   |            |                                  |
|                                                                                                                                   |                                 | 32 to 38                                            | 0 to 0     | 12 to 15                                  | 0 to 0     |                                  |
|                                                                                                                                   |                                 | <b>32 to 38 more FN in Type 2 HSAT</b>              |            | <b>12 to 15 more FN in Type 2 HSAT</b>    |            |                                  |
| <b>True negatives</b><br>(patients without OSA)<br><br><b>False positives</b><br>(patients incorrectly classified as having OSA)  | ⊕⊕⊕⊕<br>HIGH                    | 274 to 277                                          | 360 to 360 | 570 to 578                                | 250 to 250 | 116 <sup>A,B</sup><br>(2)        |
|                                                                                                                                   |                                 | <b>83 to 86 fewer TN in Type 2 HSAT</b>             |            | <b>172 to 180 fewer TN in Type 2 HSAT</b> |            |                                  |
|                                                                                                                                   |                                 | 83 to 86                                            | 0 to 0     | 172 to 180                                | 0 to 0     |                                  |
|                                                                                                                                   |                                 | <b>83 to 86 more FP in Type 2 HSAT</b>              |            | <b>172 to 180 more FP in Type 2 HSAT</b>  |            |                                  |



**Table S39—Summary of Findings table for Type 3 HSAT vs. PSG to diagnose OSA in Suspected Adults (AHI ≥ 5)**

References: Gjevre 2011 (A); Masa 2011 Thorax (B); Polese 2012 (C); Santos-Silva 2009 (D); Yin 2006 (E); Planes 2010 (F); Masa 2013 (G)

Range of sensitivities Type 3 HSAT: 0.90 to 1 | Range of specificities Type 3 HSAT: 0.30 to 0.67  
 Range of sensitivities Attended: 1.00 to 1.00 | Range of specificities Attended: 1.00 to 1.00 Accuracy (high risk): 84% to 91% Accuracy (low risk): 70% to 78%

| Test result                                                                                                                       | Quality of the Evidence (GRADE) | Number of results per 1000 patients tested (95% CI) |            |                                           |            | Number of participants (studies) |
|-----------------------------------------------------------------------------------------------------------------------------------|---------------------------------|-----------------------------------------------------|------------|-------------------------------------------|------------|----------------------------------|
|                                                                                                                                   |                                 | Prevalence 87%                                      |            | Prevalence 55%                            |            |                                  |
|                                                                                                                                   |                                 | Type 3 HSAT                                         | Attended   | Type 3 HSAT                               | Attended   |                                  |
| <b>True positives</b><br>(patients with OSA)<br><br><b>False negatives</b><br>(patients incorrectly classified as not having OSA) | ⊕⊕⊕○<br>MODERATE <sup>1</sup>   | 783 to 870                                          | 870 to 870 | 495 to 550                                | 550 to 550 | 1001 (7) <sup>A-G</sup>          |
|                                                                                                                                   |                                 | <b>0 to 87 fewer TP in Type 3 HSAT</b>              |            | <b>0 to 55 fewer TP in Type 3 HSAT</b>    |            |                                  |
|                                                                                                                                   |                                 | 0 to 87                                             | 0 to 0     | 0 to 55                                   | 0 to 0     |                                  |
|                                                                                                                                   |                                 | <b>0 to 87 more FN in Type 3 HSAT</b>               |            | <b>0 to 55 more FN in Type 3 HSAT</b>     |            |                                  |
| <b>True negatives</b><br>(patients without OSA)<br><br><b>False positives</b><br>(patients incorrectly classified as having OSA)  | ⊕⊕⊕○<br>MODERATE <sup>1</sup>   | 39 to 87                                            | 130 to 130 | 135 to 302                                | 450 to 450 | 1001 (7) <sup>A-G</sup>          |
|                                                                                                                                   |                                 | <b>43 to 91 fewer TN in Type 3 HSAT</b>             |            | <b>148 to 315 fewer TN in Type 3 HSAT</b> |            |                                  |
|                                                                                                                                   |                                 | 43 to 91                                            | 0 to 0     | 180 to 315                                | 0 to 0     |                                  |
|                                                                                                                                   |                                 | <b>43 to 91 more FP in Type 3 HSAT</b>              |            | <b>148 to 315 more FP in Type 3 HSAT</b>  |            |                                  |

<sup>1</sup>Wide range of values for specificity

**Table S40—Summary of Findings table for Type 3 HSAT vs. PSG to diagnose OSA in Suspected Adults (AHI ≥ 15)**

References: Garcia-Diaz 2007 (A); Gjevre 2011 (B); Polese 2012 (C); Santo Silva 2009 (D); Yin 2006 (E); Planes 2010 (F)

Range of sensitivities Type 3 HSAT: 0.62 to 0.94 | Range of specificities Type 3 HSAT: 0.25 to 0.97  
 Range of sensitivities Attended PSG: 1.00 to 1.00 | Range of specificities Attended PSG: 1.00 to 1.00 Accuracy (high risk): 65% to 91% Accuracy (low risk): 59% to 90%

| Test result                                                                   | Quality of the Evidence (GRADE) | Number of results per 1000 patients tested (95% CI) |              |                                          |              | Number of participants (studies) |
|-------------------------------------------------------------------------------|---------------------------------|-----------------------------------------------------|--------------|------------------------------------------|--------------|----------------------------------|
|                                                                               |                                 | Prevalence 64%                                      |              | Prevalence 25%                           |              |                                  |
|                                                                               |                                 | Type 3 HSAT                                         | Attended PSG | Type 3 HSAT                              | Attended PSG |                                  |
| <b>True positives</b><br>(patients with OSA)                                  | ⊕⊕⊕○<br>MODERATE <sup>1</sup>   | 397 to 602                                          | 640 to 640   | 155 to 235                               | 250 to 250   | 457<br>(6) <sup>A-F</sup>        |
| <b>False negatives</b><br>(patients incorrectly classified as not having OSA) |                                 | 38 to 243                                           | 0 to 0       | 15 to 95                                 | 0 to 0       |                                  |
|                                                                               |                                 | <b>38 to 243 fewer TP in Type 3 HSAT</b>            |              | <b>15 to 95 fewer TP in Type 3 HSAT</b>  |              |                                  |
|                                                                               |                                 | <b>38 to 243 more FN in Type 3 HSAT</b>             |              | <b>15 to 95 more FN in Type 3 HSAT</b>   |              |                                  |
| <b>True negatives</b><br>(patients without OSA)                               | ⊕⊕⊕○<br>MODERATE <sup>1</sup>   | 90 to 349                                           | 360 to 360   | 188 to 728                               | 750 to 750   | 457<br>(6) <sup>A-F</sup>        |
| <b>False positives</b><br>(patients incorrectly classified as having OSA)     |                                 | 11 to 270                                           | 0 to 0       | 22 to 562                                | 0 to 0       |                                  |
|                                                                               |                                 | <b>11 to 270 fewer TN in Type 3 HSAT</b>            |              | <b>22 to 562 fewer TN in Type 3 HSAT</b> |              |                                  |
|                                                                               |                                 | <b>11 to 270 more FP in Type 3 HSAT</b>             |              | <b>22 to 562 more FP in Type 3 HSAT</b>  |              |                                  |

<sup>1</sup>Wide range of values for specificity and sensitivity

**Figure S16—Type 3 HSAT vs. PSG (AHI ≥ 30)**

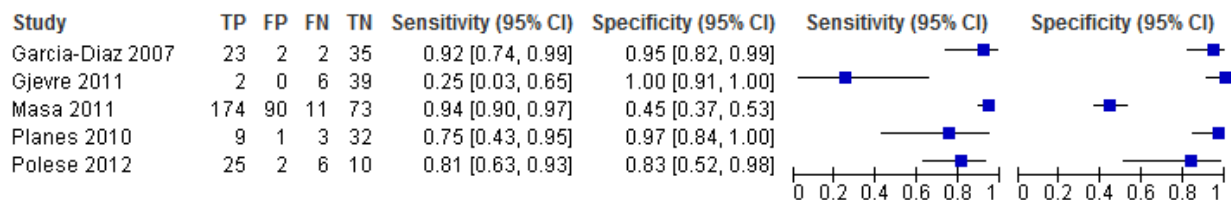

**Pooled sensitivity:** 0.87 [0.77, 0.93]

**Pooled specificity:** 0.88 [0.59, 0.97]

**DOR:** 49.0 [13.9, 172.2]

**LR+:** 7.06 [1.88, 26.6]

**LR-:** 0.14 [0.08, 0.25]

**Accuracy:** 0.77 or **77%**

Figure S17—ROC Curve for Type 3 HSAT vs. PSG (AHI  $\geq$  30)

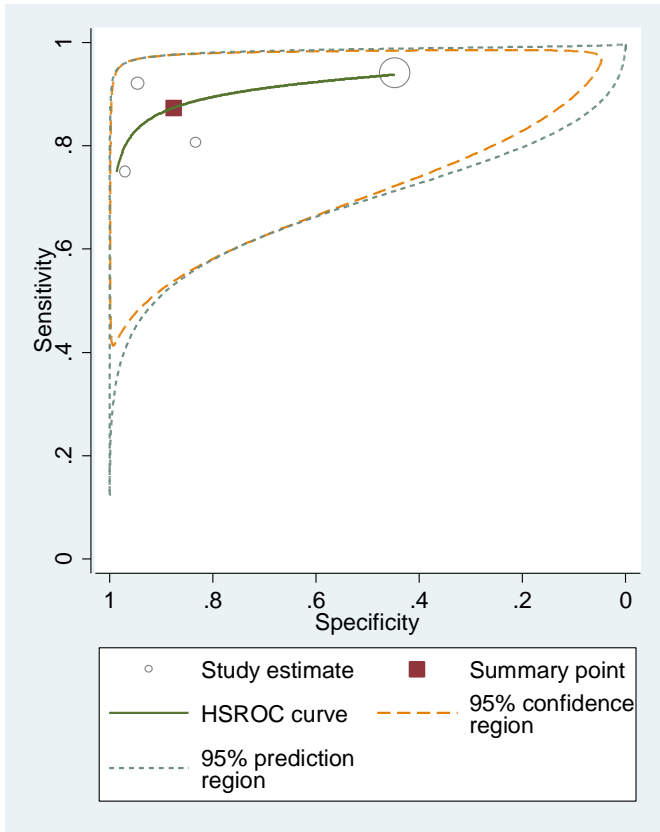

**Table S41—Summary of Findings table for Type 3 HSAT vs. PSG to diagnose OSA in Suspected Adults (AHI ≥ 30)**

**References:** Garcia-Diaz 2007 (A); Gjevre 2011 (B); Masa 2011 (C); Planes 2010 (D); Polese 2012 (E)

**Pooled sensitivity Type 3 HSAT:** 0.87 (95% CI: 0.77 to 0.93) | **Pooled specificity Type 3 HSAT:** 0.88 (95% CI: 0.59 to 0.97)  
**Pooled sensitivity Attended PSG:** 1.00 (95% CI: 1.00 to 1.00) | **Pooled specificity Attended PSG:** 1.00 (95% CI: 1.00 to 1.00)  
**Accuracy (high risk):** 88% (95% CI: 81 to 94%) **Accuracy (low risk):** 88% (95% CI: 71 to 95%)

| Test result                                                                   | Quality of the Evidence (GRADE) | Number of results per 1000 patients tested (95% CI) |                  |                                    |                  | Number of participants (studies) |
|-------------------------------------------------------------------------------|---------------------------------|-----------------------------------------------------|------------------|------------------------------------|------------------|----------------------------------|
|                                                                               |                                 | Prevalence 36%                                      |                  | Prevalence 10%                     |                  |                                  |
|                                                                               |                                 | Type 3 HSAT                                         | Attended PSG     | Type 3 HSAT                        | Attended PSG     |                                  |
| <b>True positives</b><br>(patients with OSA)                                  |                                 | 313 (277 to 335)                                    | 360 (360 to 360) | 87 (77 to 93)                      | 100 (100 to 100) | 545 (5) <sup>A-E</sup>           |
|                                                                               |                                 | <b>47 fewer TP in Type 3 HSAT</b>                   |                  | <b>13 fewer TP in Type 3 HSAT</b>  |                  |                                  |
|                                                                               |                                 | 47 (25 to 83)                                       | 0 (0 to 0)       | 13 (7 to 23)                       | 0 (0 to 0)       |                                  |
|                                                                               |                                 | <b>47 more FN in Type 3 HSAT</b>                    |                  | <b>13 more FN in Type 3 HSAT</b>   |                  |                                  |
| <b>False negatives</b><br>(patients incorrectly classified as not having OSA) |                                 | 563 (378 to 621)                                    | 640 (640 to 640) | 792 (531 to 873)                   | 900 (900 to 900) | 545 (5) <sup>A-E</sup>           |
|                                                                               |                                 | <b>77 fewer TN in Type 3 HSAT</b>                   |                  | <b>108 fewer TN in Type 3 HSAT</b> |                  |                                  |
|                                                                               |                                 | 77 (19 to 262)                                      | 0 (0 to 0)       | 108 (27 to 369)                    | 0 (0 to 0)       |                                  |
|                                                                               |                                 | <b>77 more FP in Type 3 HSAT</b>                    |                  | <b>108 more FP in Type 3 HSAT</b>  |                  |                                  |

<sup>1</sup>Wide confidence intervals for sensitivity and specificity

<sup>2</sup>Wide range of values for sensitivity and specificity

**Table S42—Summary of Findings table for 2-3 Channel HSAT vs. PSG to diagnose OSA in Suspected Adults (AHI ≥ 5)**

References: Ayappa 2008 (A); Tonelli de Oliveria 2009 (B); Ward 2015 (C)

Range of sensitivities 2-3 Channel HSAT: 0.80 to 0.96 | Range of specificities 2-3 Channel HSAT: 0.65 to 0.83 Range of sensitivities Attended PSG: 1.00 to 1.00 | Range of specificities Attended PSG: 1.00 to 1.00 Accuracy (high risk): 81% to 93% Accuracy (low risk): 77% to 88%

| Test result                                                                   | Quality of the Evidence (GRADE) | Number of results per 1000 patients tested (95% CI) |              |                                               |              | Number of participants (studies) |
|-------------------------------------------------------------------------------|---------------------------------|-----------------------------------------------------|--------------|-----------------------------------------------|--------------|----------------------------------|
|                                                                               |                                 | Prevalence 36%                                      |              | Prevalence 10%                                |              |                                  |
|                                                                               |                                 | 2-3 Channel HSAT                                    | Attended PSG | 2-3 Channel HSAT                              | Attended PSG |                                  |
| <b>True positives</b><br>(patients with OSA)                                  | ⊕⊕⊕○<br>MODERATE <sup>1</sup>   | 696 to 835                                          | 870 to 870   | 440 to 528                                    | 550 to 550   | 292 (3) <sup>A-C</sup>           |
|                                                                               |                                 | <b>35 to 174 fewer TP in 2-3 Channel HSAT</b>       |              | <b>22 to 110 fewer TP in 2-3 Channel HSAT</b> |              |                                  |
|                                                                               |                                 | 35 to 174                                           | 0 to 0       | 22 to 110                                     | 0 to 0       |                                  |
|                                                                               |                                 | <b>35 to 174 more FN in 2-3 Channel HSAT</b>        |              | <b>22 to 110 more FN in 2-3 Channel HSAT</b>  |              |                                  |
| <b>False negatives</b><br>(patients incorrectly classified as not having OSA) | ⊕⊕⊕○<br>MODERATE <sup>1</sup>   | 85 to 108                                           | 130 to 130   | 293 to 373                                    | 450 to 450   | 292 (3) <sup>A-C</sup>           |
|                                                                               |                                 | <b>22 to 45 fewer TN in 2-3 Channel HSAT</b>        |              | <b>77 to 157 fewer TN in 2-3 Channel HSAT</b> |              |                                  |
|                                                                               |                                 | 22 to 45                                            | 0 to 0       | 77 to 157                                     | 0 to 0       |                                  |
|                                                                               |                                 | <b>22 to 45 more FP in 2-3 Channel HSAT</b>         |              | <b>77 to 157 more FP in 2-3 Channel HSAT</b>  |              |                                  |

<sup>1</sup>Wide range of sensitivity

**Table S43—Summary of Findings table for 2-3 Channel HSAT vs. PSG to diagnose OSA in Suspected Adults (AHI ≥ 15)**

**References:** Ayappa 2008 (A); Baltzan 2000 (B); Masdeu 2010 (C); Tonelli de Oliveria 2009 (D); Ward 2015 (E)

**Range of sensitivities 2-3 Channel HSAT:** 0.66 to 0.88 | **Range of specificities 2-3 Channel HSAT:** 0.62 to 1.00  
**Range of sensitivities Attended PSG:** 1.00 to 1.00 | **Range of specificities Attended PSG:** 1.00 to 1.00 **Accuracy (high risk):** 72% to 87% **Accuracy (low risk):** 68% to 95%

| Test result                                                                   | Quality of the Evidence (GRADE) | Number of results per 1000 patients tested (95% CI) |              |                                              |              | Number of participants (studies) |
|-------------------------------------------------------------------------------|---------------------------------|-----------------------------------------------------|--------------|----------------------------------------------|--------------|----------------------------------|
|                                                                               |                                 | Prevalence 36%                                      |              | Prevalence 10%                               |              |                                  |
|                                                                               |                                 | 2-3 Channel HSAT                                    | Attended PSG | 2-3 Channel HSAT                             | Attended PSG |                                  |
| <b>True positives</b><br>(patients with OSA)                                  | ⊕⊕⊕○<br>MODERATE <sup>1</sup>   | 422 to 563                                          | 640 to 640   | 165 to 220                                   | 250 to 250   | 443<br>(5) <sup>A-E</sup>        |
| <b>False negatives</b><br>(patients incorrectly classified as not having OSA) |                                 | <b>77 to 218 fewer TP in 2-3 Channel HSAT</b>       |              | <b>30 to 85 fewer TP in 2-3 Channel HSAT</b> |              |                                  |
|                                                                               |                                 | 77 to 218                                           | 0 to 0       | 30 to 85                                     | 0 to 0       |                                  |
|                                                                               |                                 | <b>77 to 218 more FN in 2-3 Channel HSAT</b>        |              | <b>30 to 85 more FN in 2-3 Channel HSAT</b>  |              |                                  |
| <b>True negatives</b><br>(patients without OSA)                               | ⊕⊕⊕○<br>MODERATE <sup>1</sup>   | 223 to 360                                          | 360 to 360   | 465 to 750                                   | 750 to 750   | 443<br>(5) <sup>A-E</sup>        |
| <b>False positives</b><br>(patients incorrectly classified as having OSA)     |                                 | <b>0 to 137 fewer TN in 2-3 Channel HSAT</b>        |              | <b>0 to 285 fewer TN in 2-3 Channel HSAT</b> |              |                                  |
|                                                                               |                                 | 22 to 137                                           | 0 to 0       | 0 to 285                                     | 0 to 0       |                                  |
|                                                                               |                                 | <b>0 to 137 more FP in 2-3 Channel HSAT</b>         |              | <b>0 to 285 more FP in 2-3 Channel HSAT</b>  |              |                                  |

<sup>1</sup>Wide range of sensitivity and specificity

**Table S44—Summary of Findings table for 2-3 Channel HSAT vs. PSG to diagnose OSA in Suspected Adults (AHI ≥ 30)**

References: Tonelli de Oliveria 2009 (A); Ward 2015 (B)

Range of sensitivities 2-3 Channel HSAT: 0.78 to 0.90 | Range of specificities 2-3 Channel HSAT: 0.92 to 0.98  
 Range of sensitivities Attended PSG: 1.00 to 1.00 | Range of specificities Attended PSG: 1.00 to 1.00 Accuracy (high risk): 71% to 90% Accuracy (low risk): 88% to 91%

| Test result                                                                                                                       | Quality of the Evidence (GRADE) | Number of results per 1000 patients tested (95% CI) |              |                                              |              | Number of participants (studies) |
|-----------------------------------------------------------------------------------------------------------------------------------|---------------------------------|-----------------------------------------------------|--------------|----------------------------------------------|--------------|----------------------------------|
|                                                                                                                                   |                                 | Prevalence 36%                                      |              | Prevalence 10%                               |              |                                  |
|                                                                                                                                   |                                 | 2-3 Channel HSAT                                    | Attended PSG | 2-3 Channel HSAT                             | Attended PSG |                                  |
| <b>True positives</b><br>(patients with OSA)<br><br><b>False negatives</b><br>(patients incorrectly classified as not having OSA) | ⊕⊕⊕⊕<br>HIGH                    | 155 to 288                                          | 360 to 360   | 43 to 80                                     | 100 to 100   | 225 (2) <sup>A-B</sup>           |
|                                                                                                                                   |                                 | <b>72 to 205 fewer TP in 2-3 Channel HSAT</b>       |              | <b>20 to 57 fewer TP in 2-3 Channel HSAT</b> |              |                                  |
|                                                                                                                                   |                                 | 72 to 205                                           | 0 to 0       | 20 to 57                                     | 0 to 0       |                                  |
|                                                                                                                                   |                                 | <b>72 to 205 more FN in 2-3 Channel HSAT</b>        |              | <b>20 to 57 more FN in 2-3 Channel HSAT</b>  |              |                                  |
| <b>True negatives</b><br>(patients without OSA)<br><br><b>False positives</b><br>(patients incorrectly classified as having OSA)  | ⊕⊕⊕⊕<br>HIGH                    | 589 to 627                                          | 640 to 640   | 828 to 882                                   | 900 to 900   | 225 (2) <sup>A-B</sup>           |
|                                                                                                                                   |                                 | <b>13 to 51 fewer TN in 2-3 Channel HSAT</b>        |              | <b>18 to 72 fewer TN in 2-3 Channel HSAT</b> |              |                                  |
|                                                                                                                                   |                                 | 13 to 51                                            | 0 to 0       | 18 to 72                                     | 0 to 0       |                                  |
|                                                                                                                                   |                                 | <b>13 to 51 more FP in 2-3 Channel HSAT</b>         |              | <b>18 to 72 more FP in 2-3 Channel HSAT</b>  |              |                                  |

**Table S45—Summary of Findings table for 2-3 Channel HSAT vs. In-home PSG to diagnose OSA in Suspected Adults (AHI ≥ 15)**

References: Gantner 2010 (A)

Single study sensitivity 2-3 Channel HSAT: 0.88 (95% CI: 0.80 to 0.93) | Single study specificity 2-3 Channel HSAT: 0.84 (95% CI: 0.69 to 0.93) | Single study sensitivity In-home PSG: 1.00 (95% CI: 1.00 to 1.00) | Single study specificity In-home PSG: 1.00 (95% CI: 1.00 to 1.00) | Accuracy (high risk): 86% (95% CI: 76 to 93%) | Accuracy (low risk): 85% (95% CI: 72 to 93%)

| Test result                                                                                                                       | Quality of the Evidence (GRADE) | Number of results per 1000 patients tested (95% CI) |                  |                                         |                  | Number of participants (studies) |
|-----------------------------------------------------------------------------------------------------------------------------------|---------------------------------|-----------------------------------------------------|------------------|-----------------------------------------|------------------|----------------------------------|
|                                                                                                                                   |                                 | Prevalence 64%                                      |                  | Prevalence 25%                          |                  |                                  |
|                                                                                                                                   |                                 | 2-3 Channel HSAT                                    | In-home PSG      | 2-3 Channel HSAT                        | In-home PSG      |                                  |
| <b>True positives</b><br>(patients with OSA)<br><br><b>False negatives</b><br>(patients incorrectly classified as not having OSA) |                                 | 563 (512 to 595)                                    | 640 (640 to 640) | 220 (200 to 233)                        | 250 (250 to 250) | 143 (1) <sup>A</sup>             |
|                                                                                                                                   |                                 | <b>77 fewer TP in 2-3 Channel HSAT</b>              |                  | <b>30 fewer TP in 2-3 Channel HSAT</b>  |                  |                                  |
|                                                                                                                                   |                                 | 77 (45 to 128)                                      | 0 (0 to 0)       | 30 (50 to 17)                           | 0 (0 to 0)       |                                  |
|                                                                                                                                   |                                 | <b>77 more FN in 2-3 Channel HSAT</b>               |                  | <b>30 more FN in 2-3 Channel HSAT</b>   |                  |                                  |
| <b>True negatives</b><br>(patients without OSA)<br><br><b>False positives</b><br>(patients incorrectly classified as having OSA)  |                                 | 302 (248 to 335)                                    | 360 (360 to 360) | 630 (518 to 698)                        | 750 (750 to 750) | 143 (1) <sup>A</sup>             |
|                                                                                                                                   |                                 | <b>58 fewer TN in 2-3 Channel HSAT</b>              |                  | <b>120 fewer TN in 2-3 Channel HSAT</b> |                  |                                  |
|                                                                                                                                   |                                 | 58 (25 to 112)                                      | 0 (0 to 0)       | 120 (52 to 232)                         | 0 (0 to 0)       |                                  |
|                                                                                                                                   |                                 | <b>58 more FP in 2-3 Channel HSAT</b>               |                  | <b>120 more FP in 2-3 Channel HSAT</b>  |                  |                                  |

<sup>1</sup>Indirect evidence as study only included Chinese population at high cardiovascular risk

<sup>2</sup>Wide confidence interval for specificity



**Table S46—Summary of Findings table for 2-3 Channel HSAT vs. in-home PSG to diagnose OSA in Suspected Adults (AHI ≥ 30)**

References: Chai-Coetzer 2010 (A); Gantner 2010 (B)

Range of sensitivities 2-3 Channel HSAT: 0.84 to 0.97 | Range of specificities 2-3 Channel HSAT: 0.82 to 0.87  
 Range of sensitivities In-home PSG: 1.00 to 1.00 | Range of specificities In-home PSG: 1.00 to 1.00 Accuracy (high risk): 83% to 91% Accuracy (low risk): 82% to 88%

| Test result                                                                                                                       | Quality of the Evidence (GRADE) | Number of results per 1000 patients tested (95% CI) |             |                                                |             | Number of participants (studies) |
|-----------------------------------------------------------------------------------------------------------------------------------|---------------------------------|-----------------------------------------------------|-------------|------------------------------------------------|-------------|----------------------------------|
|                                                                                                                                   |                                 | Prevalence 36%                                      |             | Prevalence 10%                                 |             |                                  |
|                                                                                                                                   |                                 | 2-3 Channel HSAT                                    | In-home PSG | 2-3 Channel HSAT                               | In-home PSG |                                  |
| <b>True positives</b><br>(patients with OSA)<br><br><b>False negatives</b><br>(patients incorrectly classified as not having OSA) | ⊕⊕⊕⊕<br>HIGH                    | 302 to 349                                          | 360 to 360  | 84 to 97                                       | 100 to 100  | 300 (2) <sup>A,B</sup>           |
|                                                                                                                                   |                                 | <b>11 to 58 fewer TP in 2-3 Channel HSAT</b>        |             | <b>3 to 16 fewer TP in 2-3 Channel HSAT</b>    |             |                                  |
|                                                                                                                                   |                                 | 11 to 58                                            | 0 to 0      | 3 to 16                                        | 0 to 0      |                                  |
|                                                                                                                                   |                                 | <b>11 to 58 more FN in 2-3 Channel HSAT</b>         |             | <b>3 to 16 more FN in 2-3 Channel HSAT</b>     |             |                                  |
| <b>True negatives</b><br>(patients without OSA)<br><br><b>False positives</b><br>(patients incorrectly classified as having OSA)  | ⊕⊕⊕⊕<br>HIGH                    | 525 to 557                                          | 640 to 640  | 738 to 783                                     | 900 to 900  | 300 (2) <sup>A,B</sup>           |
|                                                                                                                                   |                                 | <b>83 to 115 fewer TN in 2-3 Channel HSAT</b>       |             | <b>117 to 162 fewer TN in 2-3 Channel HSAT</b> |             |                                  |
|                                                                                                                                   |                                 | 83 to 115                                           | 0 to 0      | 117 to 162                                     | 0 to 0      |                                  |
|                                                                                                                                   |                                 | <b>83 to 115 more FP in 2-3 Channel HSAT</b>        |             | <b>117 to 162 more FP in 2-3 Channel HSAT</b>  |             |                                  |

**Table S47—Summary of Findings table for Single Channel HSAT vs. PSG to diagnose OSA in Suspected Adults (AHI ≥ 5)**

References: Nakano 2008 (A)

Single study sensitivity Single Channel HSAT: 0.96 (95% CI: 0.91 to 1.00) | Single study specificity Single Channel HSAT: 0.82 (95% CI: 0.60 to 1.00) | Single study sensitivity Attended PSG: 1.00 (95% CI: 1.00 to 1.00) | Single study specificity Attended PSG: 1.00 (95% CI: 1.00 to 1.00) | Accuracy (high risk): 94% (95% CI: 87 to 100%) | Accuracy (low risk): 90% (95% CI: 77 to 100%)

| Test result                                                                   | Quality of the Evidence (GRADE) | Number of results per 1000 patients tested (95% CI) |                  |                                           |                  | Number of participants (studies) |
|-------------------------------------------------------------------------------|---------------------------------|-----------------------------------------------------|------------------|-------------------------------------------|------------------|----------------------------------|
|                                                                               |                                 | Prevalence 87%                                      |                  | Prevalence 55%                            |                  |                                  |
|                                                                               |                                 | Single Channel HSAT                                 | Attended PSG     | Single Channel HSAT                       | Attended PSG     |                                  |
| <b>True positives</b><br>(patients with OSA)                                  | ⊕⊕⊕○<br>MODERATE <sup>1</sup>   | 835 (792 to 870)                                    | 870 (870 to 870) | 528 (501 to 550)                          | 550 (550 to 550) | 100 (1) <sup>A</sup>             |
|                                                                               |                                 | <b>35 fewer TP in Single Channel HSAT</b>           |                  | <b>22 fewer TP in Single Channel HSAT</b> |                  |                                  |
|                                                                               |                                 | 35 (0 to 78)                                        | 0 (0 to 0)       | 22 (0 to 49)                              | 0 (0 to 0)       |                                  |
|                                                                               |                                 | <b>35 more FN in Single Channel HSAT</b>            |                  | <b>22 more FN in Single Channel HSAT</b>  |                  |                                  |
| <b>False negatives</b><br>(patients incorrectly classified as not having OSA) | ⊕⊕⊕○<br>MODERATE <sup>1</sup>   | 107 (78 to 130)                                     | 130 (130 to 130) | 369 (270 to 450)                          | 450 (450 to 450) | 100 (1) <sup>A</sup>             |
|                                                                               |                                 | <b>23 fewer TN in Single Channel HSAT</b>           |                  | <b>81 fewer TN in Single Channel HSAT</b> |                  |                                  |
|                                                                               |                                 | 23 (0 to 52)                                        | 0 (0 to 0)       | 81 (0 to 180)                             | 0 (0 to 0)       |                                  |
|                                                                               |                                 | <b>23 more FP in Single Channel HSAT</b>            |                  | <b>81 more FP in Single Channel HSAT</b>  |                  |                                  |

<sup>1</sup>Wide confidence interval for specificity

**Table S48—Summary of Findings table for Single Channel HSAT vs. PSG to diagnose OSA in Suspected Adults (AHI ≥ 15)**

References: Nakano 2008 (A); Ozmen 2011 (B); Pang 2006 (C); Watkins 2009 (D)

Range of sensitivities Single-Channel HSAT: 0.55 to 0.91 | Range of specificities Single-Channel HSAT: 0.70 to 0.82  
 Range of sensitivities Attended PSG: 1.00 to 1.00 | Range of specificities Attended PSG: 1.00 to 1.00 Accuracy (high risk): 60% to 88% Accuracy (low risk): 66% to 84%

| Test result                                                                                                                       | Quality of the Evidence (GRADE) | Number of results per 1000 patients tested (95% CI) |              |                                                   |              | Number of participants (studies) |
|-----------------------------------------------------------------------------------------------------------------------------------|---------------------------------|-----------------------------------------------------|--------------|---------------------------------------------------|--------------|----------------------------------|
|                                                                                                                                   |                                 | Prevalence 64%                                      |              | Prevalence 25%                                    |              |                                  |
|                                                                                                                                   |                                 | Single-Channel HSAT                                 | Attended PSG | Single-Channel HSAT                               | Attended PSG |                                  |
| <b>True positives</b><br>(patients with OSA)<br><br><b>False negatives</b><br>(patients incorrectly classified as not having OSA) | ⊕⊕⊕○<br>MODERATE <sup>1</sup>   | 352 to 582                                          | 640 to 640   | 138 to 228                                        | 250 to 250   | 235 (4) <sup>A-D</sup>           |
|                                                                                                                                   |                                 | <b>58 to 288 fewer TP in Single-Channel HSAT</b>    |              | <b>22 to 112 fewer TP in Single-Channel HSAT</b>  |              |                                  |
|                                                                                                                                   |                                 | 58 to 288                                           | 0 to 0       | 22 to 112                                         | 0 to 0       |                                  |
|                                                                                                                                   |                                 | <b>58 to 288 more FN in Single-Channel HSAT</b>     |              | <b>22 to 112 more FN in Single-Channel HSAT</b>   |              |                                  |
| <b>True negatives</b><br>(patients without OSA)<br><br><b>False positives</b><br>(patients incorrectly classified as having OSA)  | ⊕⊕⊕○<br>MODERATE <sup>1</sup>   | 252 to 295                                          | 360 to 360   | 525 to 615                                        | 750 to 750   | 235 (4) <sup>A-D</sup>           |
|                                                                                                                                   |                                 | <b>65 to 108 fewer TN in Single-Channel HSAT</b>    |              | <b>135 to 225 fewer TN in Single-Channel HSAT</b> |              |                                  |
|                                                                                                                                   |                                 | 65 to 108                                           | 0 to 0       | 135 to 225                                        | 0 to 0       |                                  |
|                                                                                                                                   |                                 | <b>65 to 108 more FP in Single-Channel HSAT</b>     |              | <b>135 to 225 more FP in Single-Channel HSAT</b>  |              |                                  |

<sup>1</sup>Wide range of values for sensitivity

**Table S49—Summary of Findings table for Single Channel HSAT vs. PSG to diagnose OSA in Suspected Adults (AHI ≥ 30)**

References: Nakano 2008 (A)

Single study sensitivity Single Channel HSAT: 0.89 (95% CI: 0.80 to 0.97) | Single study specificity Single Channel HSAT: 0.96 (95% CI: 0.90 to 1.00) | Single study sensitivity Attended PSG: 1.00 (95% CI: 1.00 to 1.00) | Single study specificity Attended PSG: 1.00 (95% CI: 1.00 to 1.00) | Accuracy (high risk): 93% (95% CI: 86 to 99%) | Accuracy (low risk): 95% (95% CI: 88 to 100%)

| Test result                                                                   | Quality of the Evidence (GRADE) | Number of results per 1000 patients tested (95% CI) |                  |                                           |                  | Number of participants (studies) |
|-------------------------------------------------------------------------------|---------------------------------|-----------------------------------------------------|------------------|-------------------------------------------|------------------|----------------------------------|
|                                                                               |                                 | Prevalence 36%                                      |                  | Prevalence 10%                            |                  |                                  |
|                                                                               |                                 | Single Channel HSAT                                 | Attended PSG     | Single Channel HSAT                       | Attended PSG     |                                  |
| <b>True positives</b><br>(patients with OSA)                                  | ⊕⊕⊕⊕<br>HIGH                    | 320 (288 to 349)                                    | 360 (360 to 360) | 89 (80 to 97)                             | 100 (100 to 100) | 100 (1) <sup>A</sup>             |
|                                                                               |                                 | <b>40 fewer TP in Single Channel HSAT</b>           |                  | <b>11 fewer TP in Single Channel HSAT</b> |                  |                                  |
|                                                                               |                                 | 40 (11 to 72)                                       | 0 (0 to 0)       | 11 (3 to 20)                              | 0 (0 to 0)       |                                  |
|                                                                               |                                 | <b>40 more FN in Single Channel HSAT</b>            |                  | <b>11 more FN in Single Channel HSAT</b>  |                  |                                  |
| <b>False negatives</b><br>(patients incorrectly classified as not having OSA) | ⊕⊕⊕⊕<br>HIGH                    | 614 (576 to 640)                                    | 640 (640 to 640) | 864 (810 to 900)                          | 900 (900 to 900) | 100 (1) <sup>A</sup>             |
|                                                                               |                                 | <b>26 fewer TN in Single Channel HSAT</b>           |                  | <b>36 fewer TN in Single Channel HSAT</b> |                  |                                  |
|                                                                               |                                 | 26 (0 to 64)                                        | 0 (0 to 0)       | 36 (0 to 90)                              | 0 (0 to 0)       |                                  |
|                                                                               |                                 | <b>26 more FP in Single Channel HSAT</b>            |                  | <b>36 more FP in Single Channel HSAT</b>  |                  |                                  |

**Table S50—Summary of Findings table for Other Single-Channel HSAT vs. PSG to diagnose OSA in Suspected Adults (AHI ≥ 5)**

References: Rofail 2010 (A)

Single study sensitivity Other Single-Channel HSAT: 0.80 (95% CI: 0.67 to 0.93) | Single study specificity Other Single-Channel HSAT: 0.87 (95% CI: 0.77 to 0.97) | Single study sensitivity Attended PSG: 1.00 (95% CI: 1.00 to 1.00) | Single study specificity Attended PSG: 1.00 (95% CI: 1.00 to 1.00) | Accuracy (high risk): 81% (95% CI: 68 to 94%) | Accuracy (low risk): 83% (95% CI: 72 to 95%)

| Test result                                                                                                                       | Quality of the Evidence (GRADE) | Number of results per 1000 patients tested (95% CI) |                  |                                                  |                  | Number of participants (studies) |
|-----------------------------------------------------------------------------------------------------------------------------------|---------------------------------|-----------------------------------------------------|------------------|--------------------------------------------------|------------------|----------------------------------|
|                                                                                                                                   |                                 | Prevalence 87%                                      |                  | Prevalence 55%                                   |                  |                                  |
|                                                                                                                                   |                                 | Other Single-Channel HSAT                           | Attended PSG     | Other Single-Channel HSAT                        | Attended PSG     |                                  |
| <b>True positives</b><br>(patients with OSA)<br><br><b>False negatives</b><br>(patients incorrectly classified as not having OSA) | ⊕⊕⊕○<br>MODERATE <sup>1</sup>   | 696 (583 to 809)                                    | 870 (870 to 870) | 440 (369 to 512)                                 | 550 (550 to 550) | 92 (1) <sup>A</sup>              |
|                                                                                                                                   |                                 | <b>174 fewer TP in Other Single-Channel HSAT</b>    |                  | <b>110 fewer TP in Other Single-Channel HSAT</b> |                  |                                  |
|                                                                                                                                   |                                 | 174 (61 to 287)                                     | 0 (0 to 0)       | 110 (38 to 181)                                  | 0 (0 to 0)       |                                  |
|                                                                                                                                   |                                 | <b>174 more FN in Other Single-Channel HSAT</b>     |                  | <b>110 more FN in Other Single-Channel HSAT</b>  |                  |                                  |
| <b>True negatives</b><br>(patients without OSA)<br><br><b>False positives</b><br>(patients incorrectly classified as having OSA)  | ⊕⊕⊕○<br>MODERATE <sup>1</sup>   | 113 (100 to 126)                                    | 130 (130 to 130) | 391 (347 to 436)                                 | 450 (450 to 450) | 92 (1) <sup>A</sup>              |
|                                                                                                                                   |                                 | <b>17 fewer TN in Other Single-Channel HSAT</b>     |                  | <b>59 fewer TN in Other Single-Channel HSAT</b>  |                  |                                  |
|                                                                                                                                   |                                 | 17 (4 to 30)                                        | 0 (0 to 0)       | 59 (14 to 103)                                   | 0 (0 to 0)       |                                  |
|                                                                                                                                   |                                 | <b>17 more FP in Other Single-Channel HSAT</b>      |                  | <b>59 more FP in Other Single-Channel HSAT</b>   |                  |                                  |

<sup>1</sup>Wide confidence intervals for specificity and sensitivity

**Table S51—Summary of Findings table for Oximetry vs. In-home PSG to diagnose OSA in Suspected Adults (AHI ≥ 5)**

References: Chung 2012 (A)

Single study sensitivity Oximetry : 0.70 (95% CI: 0.66 to 0.76) | Single study specificity Oximetry : 0.90 (95% CI: 0.85 to 0.94)

Single study sensitivity In-home PSG: 1.00 (95% CI: 1.00 to 1.00) | Single study specificity In-home PSG: 1.00 (95% CI: 1.00 to 1.00) Accuracy (high risk): 73% (95% CI: 68 to 78%) Accuracy (low risk): 79% (95% CI: 74 to 84%)

| Test result                                                                   | Quality of the Evidence (GRADE) | Number of results per 1000 patients tested (95% CI) |                  |                                 |                  | Number of participants (studies) |
|-------------------------------------------------------------------------------|---------------------------------|-----------------------------------------------------|------------------|---------------------------------|------------------|----------------------------------|
|                                                                               |                                 | Prevalence 87%                                      |                  | Prevalence 55%                  |                  |                                  |
|                                                                               |                                 | Oximetry                                            | In-home PSG      | Oximetry                        | In-home PSG      |                                  |
| <b>True positives</b><br>(patients with OSA)                                  | ⊕⊕⊕○<br>MODERATE <sup>1</sup>   | 609 (574 to 661)                                    | 870 (870 to 870) | 385 (363 to 418)                | 550 (550 to 550) | 243<br>(1) <sup>A</sup>          |
|                                                                               |                                 | <b>261 fewer TP in Oximetry</b>                     |                  | <b>165 fewer TP in Oximetry</b> |                  |                                  |
| <b>False negatives</b><br>(patients incorrectly classified as not having OSA) |                                 | 261 (209 to 296)                                    | 0 (0 to 0)       | 165 (132 to 187)                | 0 (0 to 0)       |                                  |
|                                                                               |                                 | <b>261 more FN in Oximetry</b>                      |                  | <b>165 more FN in Oximetry</b>  |                  |                                  |
| <b>True negatives</b><br>(patients without OSA)                               | ⊕⊕⊕○<br>MODERATE <sup>1</sup>   | 117 (111 to 122)                                    | 130 (130 to 130) | 405 (382 to 423)                | 450 (450 to 450) | 243<br>(1) <sup>A</sup>          |
|                                                                               |                                 | <b>13 fewer TN in Oximetry</b>                      |                  | <b>45 fewer TN in Oximetry</b>  |                  |                                  |
| <b>False positives</b><br>(patients incorrectly classified as having OSA)     |                                 | 13 (8 to 19)                                        | 0 (0 to 0)       | 45 (27 to 68)                   | 0 (0 to 0)       |                                  |
|                                                                               |                                 | <b>13 more FP in Oximetry</b>                       |                  | <b>45 more FP in Oximetry</b>   |                  |                                  |

<sup>1</sup>Indirect evidence as study only included patients scheduled for inpatient surgery

**Table S52—Summary of Findings table for Oximetry vs. In-home PSG to diagnose OSA in Suspected Adults (AHI ≥ 15)**

References: Chung 2012 (A)

Single study sensitivity Oximetry: 0.93 (95% CI: 0.90 to 0.97) | Single study specificity Oximetry: 0.75 (95% CI: 0.70 to 0.80)

Single study sensitivity In-home PSG: 1.00 (95% CI: 1.00 to 1.00) | Single study specificity In-home PSG: 1.00 (95% CI: 1.00 to 1.00) Accuracy (high risk): 86% (95% CI: 83 to 91%) Accuracy (low risk): 80% (95% CI: 75 to 84%)

| Test result                                                                   | Quality of the Evidence (GRADE) | Number of results per 1000 patients tested (95% CI) |                  |                                 |                  | Number of participants (studies) |
|-------------------------------------------------------------------------------|---------------------------------|-----------------------------------------------------|------------------|---------------------------------|------------------|----------------------------------|
|                                                                               |                                 | Prevalence 64%                                      |                  | Prevalence 25%                  |                  |                                  |
|                                                                               |                                 | Oximetry                                            | In-home PSG      | Oximetry                        | In-home PSG      |                                  |
| <b>True positives</b><br>(patients with OSA)                                  | ⊕⊕⊕○<br>MODERATE <sup>1</sup>   | 595 (576 to 621)                                    | 640 (640 to 640) | 233 (225 to 243)                | 250 (250 to 250) | 243<br>(1) <sup>A</sup>          |
| <b>False negatives</b><br>(patients incorrectly classified as not having OSA) |                                 | <b>45 fewer TP in Oximetry</b>                      |                  | <b>17 fewer TP in Oximetry</b>  |                  |                                  |
|                                                                               |                                 | 45 (19 to 64)                                       | 0 (0 to 0)       | 17 (7 to 25)                    | 0 (0 to 0)       |                                  |
|                                                                               |                                 | <b>45 more FN in Oximetry</b>                       |                  | <b>17 more FN in Oximetry</b>   |                  |                                  |
| <b>True negatives</b><br>(patients without OSA)                               | ⊕⊕⊕○<br>MODERATE <sup>1</sup>   | 270 (252 to 288)                                    | 360 (360 to 360) | 563 (525 to 600)                | 750 (750 to 750) | 243<br>(1) <sup>A</sup>          |
| <b>False positives</b><br>(patients incorrectly classified as having OSA)     |                                 | <b>90 fewer TN in Oximetry</b>                      |                  | <b>187 fewer TN in Oximetry</b> |                  |                                  |
|                                                                               |                                 | 90 (72 to 108)                                      | 0 (0 to 0)       | 187 (150 to 225)                | 0 (0 to 0)       |                                  |
|                                                                               |                                 | <b>90 more FP in Oximetry</b>                       |                  | <b>187 more FP in Oximetry</b>  |                  |                                  |

<sup>1</sup>Indirect evidence as study included patients scheduled for inpatient surgery

**Table S53—Summary of Findings table for Oximetry vs. In-home PSG to diagnose OSA in Suspected Adults (AHI ≥ 30)**

References: Chung 2012 (A)

Single study sensitivity Oximetry: 1.00 (95% CI: 1.00 to 1.00) | Single study specificity Oximetry: 0.59 (95% CI: 0.54 to 0.63)

Single study sensitivity In-home PSG: 1.00 (95% CI: 1.00 to 1.00) | Single study specificity In-home PSG: 1.00 (95% CI: 1.00 to 1.00) Accuracy (high risk): 74% (95% CI: 71 to 76%) Accuracy (low risk): 63% (95% CI: 59 to 67%)

| Test result                                                                   | Quality of the Evidence (GRADE) | Number of results per 1000 patients tested (95% CI) |                  |                                 |                  | Number of participants (studies) |
|-------------------------------------------------------------------------------|---------------------------------|-----------------------------------------------------|------------------|---------------------------------|------------------|----------------------------------|
|                                                                               |                                 | Prevalence 36%                                      |                  | Prevalence 10%                  |                  |                                  |
|                                                                               |                                 | Oximetry                                            | In-home PSG      | Oximetry                        | In-home PSG      |                                  |
| <b>True positives</b><br>(patients with OSA)                                  | ⊕⊕⊕○<br>MODERATE <sup>1</sup>   | 360 (360 to 360)                                    | 360 (360 to 360) | 100 (100 to 100)                | 100 (100 to 100) | 243<br>(1) <sup>A</sup>          |
| <b>False negatives</b><br>(patients incorrectly classified as not having OSA) |                                 | <b>0 fewer TP in Oximetry</b>                       |                  | <b>0 fewer TP in Oximetry</b>   |                  |                                  |
|                                                                               |                                 | 0 (0 to 0)                                          | 0 (0 to 0)       | 0 (0 to 0)                      | 0 (0 to 0)       |                                  |
| <b>True negatives</b><br>(patients without OSA)                               | ⊕⊕⊕○<br>MODERATE <sup>1</sup>   | 378 (346 to 403)                                    | 640 (640 to 640) | 531 (486 to 567)                | 900 (900 to 900) | 243<br>(1) <sup>A</sup>          |
| <b>False positives</b><br>(patients incorrectly classified as having OSA)     |                                 | <b>262 fewer TN in Oximetry</b>                     |                  | <b>369 fewer TN in Oximetry</b> |                  |                                  |
|                                                                               |                                 | 262 (237 to 294)                                    | 0 (0 to 0)       | 369 (333 to 414)                | 0 (0 to 0)       |                                  |
|                                                                               |                                 | <b>262 more FP in Oximetry</b>                      |                  | <b>369 more FP in Oximetry</b>  |                  |                                  |

<sup>1</sup>Indirect evidence as study includes patients scheduled for inpatient surgery



**Table S54—Summary of Findings table for Watch-Peripheral Arterial Tone (Watch-PAT) vs. In-Home PSG to diagnose OSA in Suspected Adults (AHI ≥ 5)**

References: O'Brien 2012 (A)

Single study sensitivity Watch-PAT: 0.88 (95% CI: 0.47 to 1.00) | Single study specificity Watch-PAT: 0.87 (95% CI: 0.66 to 0.97) Accuracy (high risk): 88% (95% CI: 50 to 100%) Accuracy (low risk): 88% (95% CI: 55 to 99%)

| Test result                                                                   | Quality of the Evidence (GRADE) | Number of results per 1000 patients tested (95% CI) |                  |                                 |                  | Number of participants (studies) |
|-------------------------------------------------------------------------------|---------------------------------|-----------------------------------------------------|------------------|---------------------------------|------------------|----------------------------------|
|                                                                               |                                 | Prevalence 87%                                      |                  | Prevalence 55%                  |                  |                                  |
|                                                                               |                                 | Watch-PAT                                           | In-Home PSG      | Watch-PAT                       | In-Home PSG      |                                  |
| <b>True positives</b><br>(patients with OSA)                                  | ⊕⊕⊕○<br>MODERATE <sup>1</sup>   | 766 (409 to 870)                                    | 870 (870 to 870) | 484 (259 to 550)                | 550 (550 to 550) | 31 (1) <sup>A</sup>              |
|                                                                               |                                 | <b>104 fewer TP in Watch-PAT</b>                    |                  | <b>66 fewer TP in Watch-PAT</b> |                  |                                  |
|                                                                               |                                 | 104 (0 to 461)                                      | 0 (0 to 0)       | 66 (0 to 291)                   | 0 (0 to 0)       |                                  |
| <b>False negatives</b><br>(patients incorrectly classified as not having OSA) | ⊕⊕⊕○<br>MODERATE <sup>1</sup>   | <b>104 more FN in Watch-PAT</b>                     |                  | <b>66 more FN in Watch-PAT</b>  |                  | 31 (1) <sup>A</sup>              |
|                                                                               |                                 | 113 (86 to 126)                                     | 130 (130 to 130) | 391 (297 to 436)                | 450 (450 to 450) |                                  |
|                                                                               |                                 | <b>17 fewer TN in Watch-PAT</b>                     |                  | <b>59 fewer TN in Watch-PAT</b> |                  |                                  |
| <b>False positives</b><br>(patients incorrectly classified as having OSA)     | ⊕⊕⊕○<br>MODERATE <sup>1</sup>   | 17 (4 to 44)                                        | 0 (0 to 0)       | 59 (14 to 153)                  | 0 (0 to 0)       | 31 (1) <sup>A</sup>              |
|                                                                               |                                 | <b>17 more FP in Watch-PAT</b>                      |                  | <b>59 more FP in Watch-PAT</b>  |                  |                                  |

<sup>1</sup>Wide confidence intervals for sensitivity and specificity

**Table S55—Summary of Findings table for Watch-PAT vs. In-lab PSG to diagnose OSA in Suspected Adults (AHI ≥ 5)**

References: Garg 2014 (A)

Single study sensitivity Watch-PAT: 0.96 (95% CI: 0.85 to 0.99) | Single study specificity Watch-PAT: 0.43 (95% CI: 0.22 to 0.66) Accuracy (high risk): 89% (95% CI: 77 to 95%) Accuracy (low risk): 72% (95% CI: 57 to 84%)

| Test result                                                                   | Quality of the Evidence (GRADE) | Number of results per 1000 patients tested (95% CI) |                  |                                  |                  | Number of participants (studies) |
|-------------------------------------------------------------------------------|---------------------------------|-----------------------------------------------------|------------------|----------------------------------|------------------|----------------------------------|
|                                                                               |                                 | Prevalence 87%                                      |                  | Prevalence 55%                   |                  |                                  |
|                                                                               |                                 | Watch-PAT                                           | In-Home PSG      | Watch-PAT                        | In-Home PSG      |                                  |
| <b>True positives</b><br>(patients with OSA)                                  | ⊕⊕⊕○<br>MODERATE <sup>1</sup>   | 835 (739 to 861)                                    | 870 (870 to 870) | 528 (468 to 545)                 | 550 (550 to 550) | 75 (1) <sup>A</sup>              |
|                                                                               |                                 | <b>35 fewer TP in Watch-PAT</b>                     |                  | <b>22 fewer TP in Watch-PAT</b>  |                  |                                  |
|                                                                               |                                 | 35 (9 to 131)                                       | 0 (0 to 0)       | 22 (5 to 82)                     | 0 (0 to 0)       |                                  |
| <b>False negatives</b><br>(patients incorrectly classified as not having OSA) | ⊕⊕⊕○<br>MODERATE <sup>1</sup>   | <b>35 more FN in Watch-PAT</b>                      |                  | <b>22 more FN in Watch-PAT</b>   |                  | 75 (1) <sup>A</sup>              |
|                                                                               |                                 | 56 (29 to 86)                                       | 130 (130 to 130) | 193 (99 to 297)                  | 450 (450 to 450) |                                  |
|                                                                               |                                 | 74 (44 to 101)                                      | 0 (0 to 0)       | 257 (153 to 351)                 | 0 (0 to 0)       |                                  |
| <b>True negatives</b><br>(patients without OSA)                               | ⊕⊕⊕○<br>MODERATE <sup>1</sup>   | <b>74 fewer TN in Watch-PAT</b>                     |                  | <b>257 fewer TN in Watch-PAT</b> |                  | 75 (1) <sup>A</sup>              |
|                                                                               |                                 | 74 (44 to 101)                                      | 0 (0 to 0)       | 257 (153 to 351)                 | 0 (0 to 0)       |                                  |
|                                                                               |                                 | <b>74 more FP in Watch-PAT</b>                      |                  | <b>257 more FP in Watch-PAT</b>  |                  |                                  |

<sup>1</sup>Wide confidence intervals for specificity

**Table S56—Summary of Findings table for Watch-PAT vs. In-lab PSG to diagnose OSA in Suspected Adults (AHI ≥ 15)**

References: Pittman 2004 (A); Garg 2014 (B)

Range of sensitivities Watch-PAT: 0.92 to 0.96 | Range of specificities Watch-PAT: 0.77 to 1.00 Accuracy (high risk): 84% to 97% Accuracy (low risk): 82% to 99%

| Test result                                                                   | Quality of the Evidence (GRADE) | Number of results per 1000 patients tested (95% CI) |            |                                       |            | Number of participants (studies) |
|-------------------------------------------------------------------------------|---------------------------------|-----------------------------------------------------|------------|---------------------------------------|------------|----------------------------------|
|                                                                               |                                 | Prevalence 64%                                      |            | Prevalence 25%                        |            |                                  |
|                                                                               |                                 | Watch-PAT                                           | In-Lab PSG | Watch-PAT                             | In-Lab PSG |                                  |
| <b>True positives</b><br>(patients with OSA)                                  | ⊕⊕⊕○<br>MODERATE <sup>1</sup>   | 589 to 614                                          | 640 to 640 | 230 to 240                            | 250 to 250 | 104<br>(2) <sup>A,B</sup>        |
|                                                                               |                                 | <b>26 to 51 fewer TP in Watch-PAT</b>               |            | <b>10 to 37 fewer TP in Watch-PAT</b> |            |                                  |
| <b>False negatives</b><br>(patients incorrectly classified as not having OSA) |                                 | 26 to 51                                            | 0 to 0     | 10 to 20                              | 0 to 0     |                                  |
|                                                                               |                                 | <b>26 to 51 more FN in Watch-PAT</b>                |            | <b>10 to 20 more FN in Watch-PAT</b>  |            |                                  |
| <b>True negatives</b><br>(patients without OSA)                               | ⊕⊕⊕○<br>MODERATE <sup>1</sup>   | 277 to 360                                          | 360 to 360 | 578 to 750                            | 750 to 750 | 104<br>(2) <sup>A,B</sup>        |
|                                                                               |                                 | <b>0 to 83 fewer TN in Watch-PAT</b>                |            | <b>0 to 172 more TN in Watch-PAT</b>  |            |                                  |
| <b>False positives</b><br>(patients incorrectly classified as having OSA)     |                                 | 0 to 83                                             | 0 to 0     | 0 to 172                              | 0 to 0     |                                  |
|                                                                               |                                 | <b>0 to 83 more FP in Watch-PAT</b>                 |            | <b>0 to 172 more FP in Watch-PAT</b>  |            |                                  |

<sup>1</sup>Wide range of values for specificity

**Table S57—Summary of Findings table for Watch-PAT vs. In-lab PSG to diagnose OSA in Suspected Adults (AHI ≥ 30)**

References: Pittman 2004 (A)

Single study sensitivity Watch-PAT: 0.92 (95% CI: 0.62 to 1.00) | Single study specificity Watch-PAT: 0.82 (95% CI: 0.57 to 0.96) Accuracy (high risk): 83% (95% CI: 58 to 97%) Accuracy (low risk): 83% (95% CI: 58 to 96%)

| Test result                                                                   | Quality of the Evidence (GRADE) | Number of results per 1000 patients tested (95% CI) |                                 |                  |                  | Number of participants (studies) |
|-------------------------------------------------------------------------------|---------------------------------|-----------------------------------------------------|---------------------------------|------------------|------------------|----------------------------------|
|                                                                               |                                 | Prevalence 36%                                      |                                 | Prevalence 10%   |                  |                                  |
|                                                                               |                                 | Watch-PAT                                           | In-Lab PSG                      | Watch-PAT        | In-Lab PSG       |                                  |
| <b>True positives</b><br>(patients with OSA)                                  | ⊕⊕⊕○<br>MODERATE <sup>1</sup>   | 331 (223 to 360)                                    | 360 (360 to 360)                | 92 (62 to 100)   | 100 (100 to 100) | 29<br>(1) <sup>A</sup>           |
| <b>False negatives</b><br>(patients incorrectly classified as not having OSA) |                                 | 29 (0 to 137)                                       | 0 (0 to 0)                      | 8 (0 to 38)      | 0 (0 to 0)       |                                  |
|                                                                               |                                 | <b>29 fewer TP in Watch-PAT</b>                     | <b>8 fewer TP in Watch-PAT</b>  |                  |                  |                                  |
| <b>True negatives</b><br>(patients without OSA)                               | ⊕⊕⊕○<br>MODERATE <sup>1</sup>   | 525 (365 to 614)                                    | 360 (360 to 360)                | 738 (513 to 864) | 100 (100 to 100) | 29<br>(1) <sup>A</sup>           |
| <b>False positives</b><br>(patients incorrectly classified as having OSA)     |                                 | 115 (26 to 275)                                     | 0 (0 to 0)                      | 162 (36 to 87)   | 0 (0 to 0)       |                                  |
|                                                                               |                                 | <b>165 more TN in Watch-PAT</b>                     | <b>638 more TN in Watch-PAT</b> |                  |                  |                                  |
|                                                                               |                                 | <b>115 more FN in Watch-PAT</b>                     | <b>8 more FN in Watch-PAT</b>   |                  |                  |                                  |
|                                                                               |                                 | <b>115 more FP in Watch-PAT</b>                     | <b>162 more FP in Watch-PAT</b> |                  |                  |                                  |

<sup>1</sup>Wide confidence intervals for sensitivity and specificity

**Figure S18—HSAT vs. Attended PSG (ESS)**

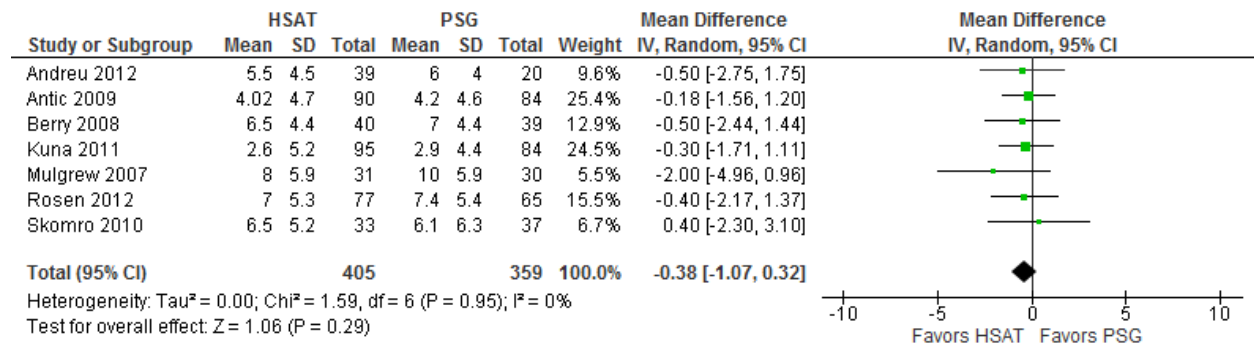

**Figure S19—HSAT vs. PSG (QOL; FOSQ)**

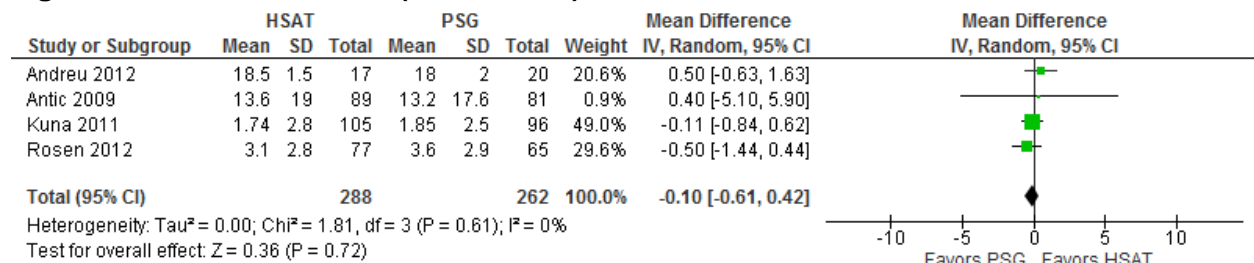

**Figure S20—HSAT vs. PSG (QOL; SAQLI)**

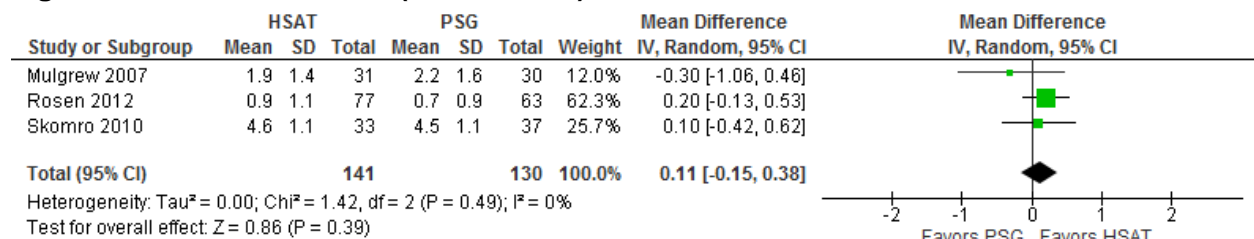

**Figure S21—HSAT vs. PSG (QOL; SF-36 Vitality Score)**

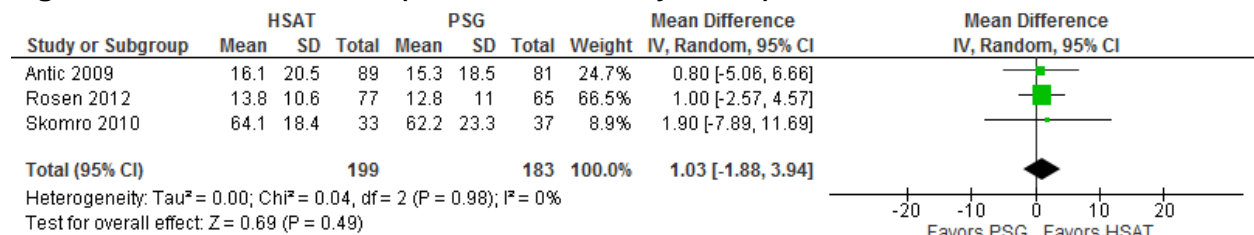

**Figure S22—HSAT vs. PSG (QOL; SF-12/36 Physical Component Summary Score)**

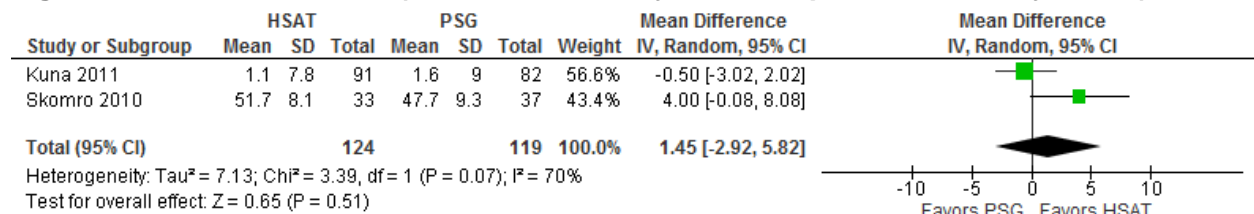

**Figure S23—HSAT vs. PSG (QOL; SF-12/36 Mental Component Summary Score)**

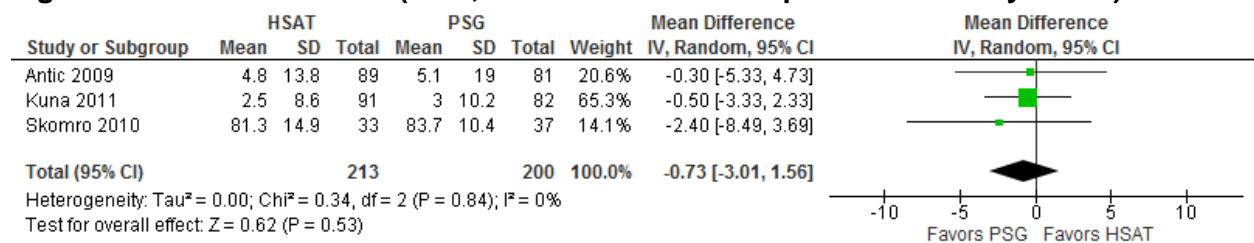

**Figure S24—HSAT vs. PSG (CPAP Adherence, h/night)**

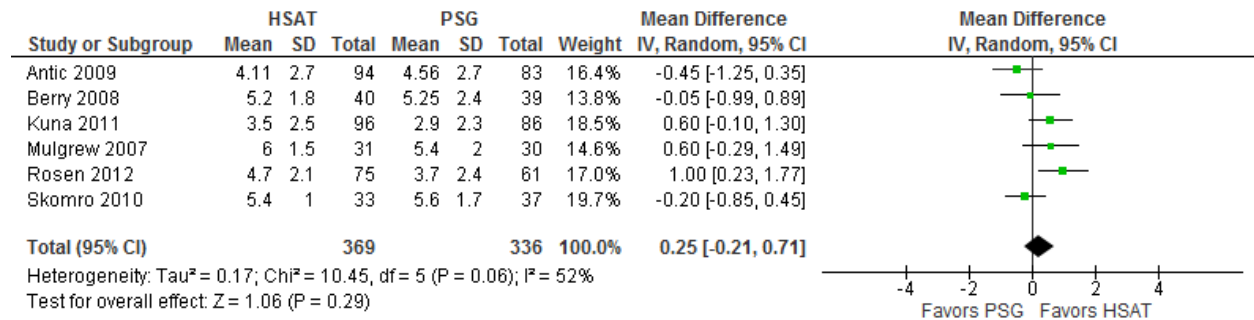

**Figure S25—HSAT vs. PSG (CPAP Adherence, no. nights > 4 h)**

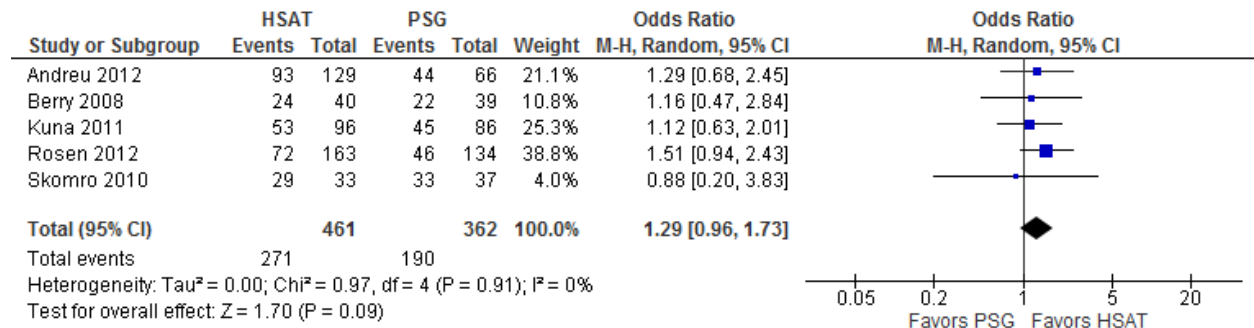

**Table S58—HSAT compared to PSG for adults suspected of OSA**

**References:** Andreu 2012 (A); Antic 2009 (B); Berry 2008 (C); Kuna 2011 (D); Mulgrew 2007 (E); Rosen 2012 (F); Skomro 2010 (G)

**Patient or population:** adults suspected of OSA

**Setting:** Home, lab

**Intervention:** HSAT

**Comparison:** Attended PSG

| Outcomes                                             | Quality of the evidence (GRADE) | Anticipated absolute effects <sup>*</sup> (95% CI)<br>MD between HSAT and PSG                                                               | No of participants (studies)                                                | Comments                             |
|------------------------------------------------------|---------------------------------|---------------------------------------------------------------------------------------------------------------------------------------------|-----------------------------------------------------------------------------|--------------------------------------|
| <b>Sleepiness* (ESS)</b>                             | ⊕⊕⊕⊕<br>HIGH                    | The mean difference in sleepiness (ESS) after treatment was 0.38 less (1.07 less to 0.32 less) with HSAT                                    | 764<br>(7 RCTs) <sup>A,G</sup>                                              |                                      |
| <b>QOL (FOSQ)*</b>                                   | ⊕⊕⊕⊕<br>HIGH                    | The mean difference in QOL (FOSQ) after treatment was 0.10 lower (0.42 higher to 0.61 lower) with HSAT                                      | 550<br>(4 RCTs) <sup>A,B,D,F</sup>                                          |                                      |
| <b>QOL (SAQLI)*</b>                                  | ⊕⊕⊕⊕<br>HIGH                    | The mean difference in QOL (SAQLI) after treatment was 0.11 greater (0.15 lower to 0.38 greater) with HSAT                                  | 271<br>(3 RCTs) <sup>E,F,G</sup>                                            |                                      |
| <b>QOL (SF-36 Vitality Score)*</b>                   | ⊕⊕⊕⊕<br>HIGH                    | The mean difference in QOL (SF-36 Vitality Score) after treatment was 1.03 greater (1.88 lower to 3.94 greater) with HSAT                   | 382<br>(3 RCTs) <sup>B,F,G</sup>                                            |                                      |
| <b>QOL (SF-12/SF-36 Physical Component Summary)*</b> | ⊕⊕⊕○<br>MODERATE <sup>1</sup>   | The mean difference in QOL (SF-12/SF-36 Physical Component Summary) after treatment was 1.45 greater (2.92 fewer to 5.82 greater) with HSAT | 243<br>(2 RCTs) <sup>D,G</sup>                                              |                                      |
| <b>QOL (SF-12/SF-36 Mental Component Summary)*</b>   | ⊕⊕⊕○<br>MODERATE <sup>1</sup>   | The mean difference in QOL (SF-12/SF-36 Mental Component Summary) after treatment was 0.73 lower (1.56 greater to 3.01 lower) with HSAT     | 413<br>(3 RCTs) <sup>B,D,G</sup>                                            |                                      |
| <b>CPAP Adherence (h/night)*</b>                     | ⊕⊕⊕○<br>MODERATE <sup>2</sup>   | The mean CPAP Adherence (h/night) in the intervention group was 0.25 h more (0.21 less to 0.71 more) with HSAT                              | 705<br>(6 RCTs) <sup>B,G</sup>                                              |                                      |
|                                                      |                                 | <b>Relative Effect</b>                                                                                                                      |                                                                             |                                      |
|                                                      |                                 | Baseline Risk                                                                                                                               | Comparative risk                                                            |                                      |
| <b>Compliance (No. of nights &gt; 4 h)*</b>          | ⊕⊕⊕⊕<br>HIGH                    | 525 per 1000                                                                                                                                | <b>588 per 1000</b><br>(515 to 656)<br><br><b>OR 1.29</b><br>(0.96 to 1.73) | 823<br>(5 RCTs) <sup>A,C,D,F,G</sup> |

\*Critical Outcomes

<sup>1</sup>Quality of evidence for QOL as measured by the SF-36 was downgraded due to imprecision (i.e., 95% CI of mean difference crosses clinical decision threshold of 3 points for SF-36 physical and mental component summary scores and the origin of the plot)

<sup>2</sup>Quality of evidence for adherence was downgraded due to imprecision (i.e., 95% CI of mean difference crosses clinical decision threshold of 0.5 h/night and the origin of the plot)

**Table S59—Summary of Findings table for Multiple-night HSAT vs. Single-night HSAT to diagnose OSA in Suspected Adults (AHI ≥ 5)**

References: Rofail 2010 (A)

Single study sensitivity Multiple-night HSAT: 0.80 (95% CI: 0.67 to 0.93) | Single study specificity Multiple-night HSAT: 0.87 (95% CI: 0.77 to 0.97) Multiple-night HSAT Accuracy (high risk): 81% (95% CI: 68 to 94%) Multiple-night HSAT Accuracy (low risk): 83% (95% CI: 72 to 95%) Single study sensitivity Single-night HSAT: 0.75 (95% CI: 0.63 to 0.85) | Single study specificity Single-night HSAT: 0.79 (95% CI: 0.61 to 0.97) Single-night HSAT Accuracy (high risk): 76% (95% CI: 63 to 86%) Single-night HSAT Accuracy (low risk): 77% (95% CI: 62 to 90%)

| Test result                                                         | Quality of the Evidence (GRADE) | Number of results per 1000 patients tested (95% CI) |                   |                                           |                   | Number of participants (studies) |
|---------------------------------------------------------------------|---------------------------------|-----------------------------------------------------|-------------------|-------------------------------------------|-------------------|----------------------------------|
|                                                                     |                                 | Prevalence 87%                                      |                   | Prevalence 55%                            |                   |                                  |
|                                                                     |                                 | Multiple-night HSAT                                 | Single-night HSAT | Multiple-night HSAT                       | Single-night HSAT |                                  |
| True positives (patients with OSA)                                  | ⊕⊕⊕○<br>MODERATE <sup>1</sup>   | 696 (583 to 809)                                    | 653 (548 to 739)  | 440 (369 to 512)                          | 413 (347 to 468)  | 92 (1) <sup>A</sup>              |
|                                                                     |                                 | <b>43 more TP in Multiple-night HSAT</b>            |                   | <b>27 more TP in Multiple-night HSAT</b>  |                   |                                  |
| False negatives (patients incorrectly classified as not having OSA) | ⊕⊕⊕○<br>MODERATE <sup>1</sup>   | 174 (61 to 287)                                     | 217 (131 to 322)  | 110 (38 to 181)                           | 137 (82 to 203)   |                                  |
|                                                                     |                                 | <b>43 fewer FN in Multiple-night HSAT</b>           |                   | <b>27 fewer FN in Multiple-night HSAT</b> |                   |                                  |
| True negatives (patients without OSA)                               | ⊕⊕⊕○<br>MODERATE <sup>1</sup>   | 113 (100 to 126)                                    | 103 (79 to 126)   | 391 (347 to 436)                          | 356 (274 to 436)  | 92 (1) <sup>A</sup>              |
|                                                                     |                                 | <b>10 more TN in Multiple-night HSAT</b>            |                   | <b>35 more TN in Multiple-night HSAT</b>  |                   |                                  |
| False positives (patients incorrectly classified as having OSA)     | ⊕⊕⊕○<br>MODERATE <sup>1</sup>   | 17 (4 to 30)                                        | 27 (4 to 51)      | 59 (14 to 103)                            | 94 (14 to 176)    |                                  |
|                                                                     |                                 | <b>10 fewer FP in Multiple-night HSAT</b>           |                   | <b>35 fewer FP in Multiple-night HSAT</b> |                   |                                  |

<sup>1</sup>Wide confidence intervals for sensitivity and specificity



**Table S60—Summary of Findings table for Multiple-night HSAT vs. Single-night HSAT to diagnose OSA in Suspected Adults (AHI ≥ 30)**

References: Rofail 2010 (A)

Single study sensitivity Multiple-night HSAT: 0.90 (95% CI: 0.83 to 0.98) | Single study specificity Multiple-night HSAT: 0.85 (95% CI: 0.78 to 0.89) Multiple-night HSAT Accuracy (high risk): 87% (95% CI: 80 to 92%) Multiple-night HSAT Accuracy (low risk): 86% (95% CI: 78 to 90%) Single study sensitivity Single-night HSAT: 0.90 (95% CI: 0.84 to 0.98) | Single study specificity Single-night HSAT: 0.83 (95% CI: 0.76 to 0.87) Single-night HSAT Accuracy (high risk): 86% (95% CI: 77 to 91%) Single-night HSAT Accuracy (low risk): 84% (95% CI: 78 to 88%)

| Test result                                                                   | Quality of the Evidence (GRADE) | Number of results per 1000 patients tested (95% CI) |                   |                                           |                   | Number of participants (studies) |
|-------------------------------------------------------------------------------|---------------------------------|-----------------------------------------------------|-------------------|-------------------------------------------|-------------------|----------------------------------|
|                                                                               |                                 | Prevalence 36%                                      |                   | Prevalence 10%                            |                   |                                  |
|                                                                               |                                 | Multiple-night HSAT                                 | Single-night HSAT | Multiple-night HSAT                       | Single-night HSAT |                                  |
| <b>True positives</b><br>(patients with OSA)                                  | ⊕⊕⊕⊕<br>HIGH                    | 324 (299 to 353)                                    | 324 (302 to 353)  | 90 (83 to 98)                             | 90 (84 to 98)     | 92 (1) <sup>A</sup>              |
|                                                                               |                                 | <b>0 fewer TP in Multiple-night HSAT</b>            |                   | <b>0 fewer TP in Multiple-night HSAT</b>  |                   |                                  |
|                                                                               |                                 | 36 (7 to 61)                                        | 36 (7 to 58)      | 10 (2 to 17)                              | 10 (2 to 16)      |                                  |
|                                                                               |                                 | <b>0 fewer FN in Multiple-night HSAT</b>            |                   | <b>0 fewer FN in Multiple-night HSAT</b>  |                   |                                  |
| <b>False negatives</b><br>(patients incorrectly classified as not having OSA) | ⊕⊕⊕⊕<br>HIGH                    | 544 (499 to 570)                                    | 531 (486 to 557)  | 765 (702 to 801)                          | 747 (684 to 783)  | 92 (1) <sup>A</sup>              |
|                                                                               |                                 | <b>13 more TN in Multiple-night HSAT</b>            |                   | <b>18 more TN in Multiple-night HSAT</b>  |                   |                                  |
|                                                                               |                                 | 96 (70 to 141)                                      | 109 (83 to 154)   | 135 (99 to 198)                           | 153 (117 to 216)  |                                  |
|                                                                               |                                 | <b>13 fewer FP in Multiple-night HSAT</b>           |                   | <b>18 fewer FP in Multiple-night HSAT</b> |                   |                                  |

# Diagnosis of obstructive sleep apnea in adults with comorbid conditions

**Table S61—Summary of Findings table for HSAT vs. PSG to diagnose OSA in Suspected Adults with comorbid conditions (AHI ≥ 15)**

References: Abraham 2006 (A); Series 2005 (B); de Vries 2015 (C)

Range of sensitivities HSAT: 0.64 to 0.93 | Range of specificities HSAT: 0.78 to 0.95  
 Range of sensitivities Attended PSG: 1.00 to 1.00 | Range of specificities Attended PSG: 1.00 to 1.00 Accuracy (high risk): 69% to 89% Accuracy (low risk): 74% to 92%

| Test result                                                                   | Quality of the Evidence (GRADE) | Number of results per 1000 patients tested (95% CI) |              |                                   |              | Number of participants (studies) |
|-------------------------------------------------------------------------------|---------------------------------|-----------------------------------------------------|--------------|-----------------------------------|--------------|----------------------------------|
|                                                                               |                                 | Prevalence 64%                                      |              | Prevalence 25%                    |              |                                  |
|                                                                               |                                 | HSAT                                                | Attended PSG | HSAT                              | Attended PSG |                                  |
| <b>True positives</b><br>(patients with OSA)                                  | ⊕⊕○○<br>LOW <sup>1,2</sup>      | 410 to 595                                          | 640 to 640   | 160 to 233                        | 250 to 250   | 190<br>(3) <sup>A-C</sup>        |
| <b>False negatives</b><br>(patients incorrectly classified as not having OSA) |                                 | <b>45 to 230 fewer TP in HSAT</b>                   |              | <b>17 to 90 fewer TP in HSAT</b>  |              |                                  |
|                                                                               |                                 | 45 to 230                                           | 0 to 0       | 17 to 90                          | 0 to 0       |                                  |
|                                                                               |                                 | <b>45 to 230 more FN in HSAT</b>                    |              | <b>17 to 90 more FN in HSAT</b>   |              |                                  |
| <b>True negatives</b><br>(patients without OSA)                               | ⊕⊕○○<br>LOW <sup>1,2</sup>      | 281 to 342                                          | 360 to 360   | 585 to 712                        | 750 to 750   | 190<br>(3) <sup>A-C</sup>        |
| <b>False positives</b><br>(patients incorrectly classified as having OSA)     |                                 | <b>18 to 79 fewer TN in HSAT</b>                    |              | <b>38 to 165 fewer TN in HSAT</b> |              |                                  |
|                                                                               |                                 | 18 to 79                                            | 0 to 0       | 38 to 165                         | 0 to 0       |                                  |
|                                                                               |                                 | <b>18 to 79 more FP in HSAT</b>                     |              | <b>38 to 165 more FP in HSAT</b>  |              |                                  |

<sup>1</sup>Wide range of values for sensitivity and specificity

<sup>2</sup>Indirectness as study populations not representative of all comorbid conditions typically associated with OSA

## Diagnosis of obstructive sleep apnea in adults using a split-night versus a full-night polysomnography protocol

**Table S62—Summary of Findings table for Split-night PSG vs. Full-night PSG to diagnose OSA in Suspected Adults (AHI ≥ 5)**

References: Khawja 2010 (A)

Single study sensitivity split-night HSAT: 0.80 (95% CI: 0.67 to 0.90) | Single study specificity split-night HSAT: 0.93 (95% CI: 0.83 to 0.98) Accuracy (high risk): 82% (95% CI: 69 to 91%) Accuracy (low risk): 86% (95% CI: 74 to 94%)

| Test result                                                                   | Quality of the Evidence (GRADE) | Number of results per 1000 patients tested (95% CI) |                  |                                         |                  | Number of participants (studies) |
|-------------------------------------------------------------------------------|---------------------------------|-----------------------------------------------------|------------------|-----------------------------------------|------------------|----------------------------------|
|                                                                               |                                 | Prevalence 87%                                      |                  | Prevalence 55%                          |                  |                                  |
|                                                                               |                                 | Split-night HSAT                                    | Full-night HSAT  | Split-night HSAT                        | Full-night HSAT  |                                  |
| <b>True positives</b><br>(patients with OSA)                                  | ⊕⊕⊕○<br>MODERATE <sup>1</sup>   | 699 (583 to 783)                                    | 870 (870 to 870) | 442 (369 to 495)                        | 550 (550 to 550) | 114 <sup>A</sup><br>(1)          |
|                                                                               |                                 | <b>171 fewer TP in split-night HSAT</b>             |                  | <b>108 fewer TP in split-night HSAT</b> |                  |                                  |
| <b>False negatives</b><br>(patients incorrectly classified as not having OSA) |                                 | 171 (87 to 287)                                     | 0 (0 to 0)       | 108 (55 to 181)                         | 0 (0 to 0)       |                                  |
|                                                                               |                                 | <b>171 fewer FN in split-night HSAT</b>             |                  | <b>108 more FN in split-night HSAT</b>  |                  |                                  |
| <b>True negatives</b><br>(patients without OSA)                               | ⊕⊕⊕○<br>MODERATE <sup>1</sup>   | 121 (108 to 127)                                    | 130 (130 to 130) | 419 (373 to 441)                        | 450 (450 to 450) | 114 <sup>A</sup><br>(1)          |
|                                                                               |                                 | <b>9 fewer TN in split-night HSAT</b>               |                  | <b>31 fewer TN in split-night HSAT</b>  |                  |                                  |
| <b>False positives</b><br>(patients incorrectly classified as having OSA)     |                                 | 9 (3 to 22)                                         | 0 (0 to 0)       | 31 (9 to 77)                            | 0 (0 to 0)       |                                  |
|                                                                               |                                 | <b>9 more FP in split-night HSAT</b>                |                  | <b>31 more FP in split-night HSAT</b>   |                  |                                  |

<sup>1</sup>Wide confidence intervals for sensitivity

**Table S63—Summary of Findings table for Split-night PSG vs. Full-night PSG to diagnose OSA in Suspected Adults (AHI ≥ 15)**

References: Khawja 2010 (A)

Single study sensitivity split-night HSAT: 0.77 (95% CI: 0.56 to 0.91) | Single study specificity split-night HSAT: 0.98 (95% CI: 0.92 to 1.00) Accuracy (high risk): 85% (95% CI: 69 to 94%) Accuracy (low risk): 93% (95% CI: 83 to 98%)

| Test result                                                         | Quality of the Evidence (GRADE) | Number of results per 1000 patients tested (95% CI) |                  |                                 |                  | Number of participants (studies) |
|---------------------------------------------------------------------|---------------------------------|-----------------------------------------------------|------------------|---------------------------------|------------------|----------------------------------|
|                                                                     |                                 | Prevalence 64%                                      |                  | Prevalence 25%                  |                  |                                  |
|                                                                     |                                 | Split-night HSAT                                    | Full-night HSAT  | Split-night HSAT                | Full-night HSAT  |                                  |
| True positives (patients with OSA)                                  | ⊕⊕⊕○<br>MODERATE <sup>1</sup>   | 493 (358 to 582)                                    | 640 (640 to 640) | 193 (140 to 228)                | 250 (250 to 250) | 114 <sup>A</sup><br>(1)          |
|                                                                     |                                 | 147 fewer TP in split-night HSAT                    |                  | 57 fewer TP in split-night HSAT |                  |                                  |
|                                                                     |                                 | 147 more FN in split-night HSAT                     |                  | 57 more FN in split-night HSAT  |                  |                                  |
| False negatives (patients incorrectly classified as not having OSA) | ⊕⊕⊕○<br>MODERATE <sup>1</sup>   | 147 (58 to 282)                                     | 0 (0 to 0)       | 57 (22 to 110)                  | 0 (0 to 0)       | 114 <sup>A</sup><br>(1)          |
|                                                                     |                                 | 147 more FN in split-night HSAT                     |                  | 57 more FN in split-night HSAT  |                  |                                  |
|                                                                     |                                 | 147 fewer TP in split-night HSAT                    |                  | 57 fewer TP in split-night HSAT |                  |                                  |
| True negatives (patients without OSA)                               | ⊕⊕⊕○<br>MODERATE <sup>1</sup>   | 353 (331 to 359)                                    | 360 (360 to 360) | 735 (690 to 748)                | 750 (750 to 750) | 114 <sup>A</sup><br>(1)          |
|                                                                     |                                 | 7 fewer TN in split-night HSAT                      |                  | 15 fewer TN in split-night HSAT |                  |                                  |
|                                                                     |                                 | 7 more FP in split-night HSAT                       |                  | 15 more FP in split-night HSAT  |                  |                                  |
| False positives (patients incorrectly classified as having OSA)     | ⊕⊕⊕○<br>MODERATE <sup>1</sup>   | 7 (1 to 29)                                         | 0 (0 to 0)       | 15 (2 to 60)                    | 0 (0 to 0)       | 114 <sup>A</sup><br>(1)          |
|                                                                     |                                 | 7 more FP in split-night HSAT                       |                  | 15 more FP in split-night HSAT  |                  |                                  |
|                                                                     |                                 | 7 fewer TN in split-night HSAT                      |                  | 15 fewer TN in split-night HSAT |                  |                                  |

<sup>1</sup>Wide confidence intervals for sensitivity

**Table S64—Summary of Findings table for Split-night PSG vs. Full-night PSG to diagnose OSA in Suspected Adults (AHI ≥ 30)**

References: Chou 2011 (A)

Single study sensitivity split-night HSAT: 0.90 (95% CI: not available) | Single study specificity split-night HSAT: 0.92 (95% CI: not available) Accuracy (high risk): 91% Accuracy (low risk): 92%

| Test result                                                                | Quality of the Evidence (GRADE) | Number of results per 1000 patients tested |                 |                                        |                 | Number of participants (studies) |
|----------------------------------------------------------------------------|---------------------------------|--------------------------------------------|-----------------|----------------------------------------|-----------------|----------------------------------|
|                                                                            |                                 | Prevalence 36%                             |                 | Prevalence 10%                         |                 |                                  |
|                                                                            |                                 | Split-night HSAT                           | Full-night HSAT | Split-night HSAT                       | Full-night HSAT |                                  |
| <b>True positives</b> (patients with OSA)                                  |                                 | 324                                        | 360             | 90                                     | 100             | 198 (1) <sup>A</sup>             |
|                                                                            |                                 | <b>36 fewer TP in split-night HSAT</b>     |                 | <b>10 fewer TP in split-night HSAT</b> |                 |                                  |
| <b>False negatives</b> (patients incorrectly classified as not having OSA) | ⊕⊕⊕⊕<br>HIGH                    | 36                                         | 0               | 10                                     | 0               |                                  |
|                                                                            |                                 | <b>36 more FN in split-night HSAT</b>      |                 | <b>10 more FN in split-night HSAT</b>  |                 |                                  |
| <b>True negatives</b> (patients without OSA)                               |                                 | 589                                        | 640             | 828                                    | 900             | 198 (1) <sup>A</sup>             |
|                                                                            |                                 | <b>51 fewer TN in split-night HSAT</b>     |                 | <b>72 fewer TN in split-night HSAT</b> |                 |                                  |
| <b>False positives</b> (patients incorrectly classified as having OSA)     | ⊕⊕⊕⊕<br>HIGH                    | 51                                         | 0               | 72                                     | 0               |                                  |
|                                                                            |                                 | <b>51 more FP in split-night HSAT</b>      |                 | <b>72 more FP in split-night HSAT</b>  |                 |                                  |

**Figure S26—Split-night PSG vs. Full-night PSG (Adherence, h/night)**

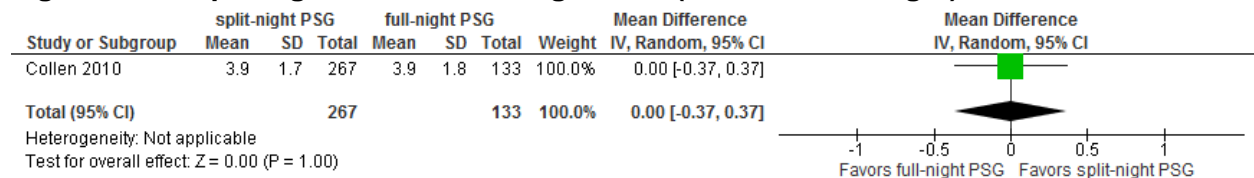

**Figure S27—Split-night PSG vs. Full-night PSG (AHI after CPAP)**

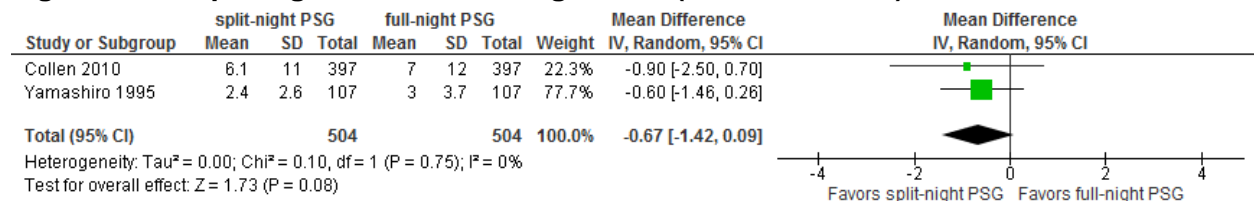

**Table S65—Summary of Findings table for split-night PSG vs. full-night PSG for the improvement in clinical outcomes of Adults suspected of OSA**

References: Collen 2010 (A); Yamashiro 1995 (B)

Patient or population: adults suspected of OSA

Setting: in-lab

Intervention: split-night PSG

Comparison: full-night PSG

| Outcomes                          | Quality of the evidence (GRADE) | Anticipated absolute effects <sup>†</sup> (95% CI)<br>MD between HSAT and PSG                                                     | No of participants (studies)   | Comments |
|-----------------------------------|---------------------------------|-----------------------------------------------------------------------------------------------------------------------------------|--------------------------------|----------|
| <b>AHI*</b>                       | ⊕⊕○○<br>LOW <sup>1</sup>        | The mean difference in AHI after treatment was 0.67 lower (1.42 lower to 0.09 higher) with split-night                            | 504<br>(2 RCTs) <sup>A,B</sup> |          |
| <b>CPAP Adherence (h/night) *</b> | ⊕⊕○○<br>LOW <sup>1</sup>        | The mean CPAP Adherence (h/night) in the split-night PSG group was 0.00 greater (0.37 fewer to 0.37 greater) with split-night PSG | 400<br>(1 RCT) <sup>A</sup>    |          |

\*Critical Outcomes

<sup>1</sup>Downgraded due to imprecision associated with a limited number of studies and small sample size

# Repeat polysomnography for the diagnosis of obstructive sleep apnea in adults

**Figure S28—Two-night PSG vs. Single-night PSG (night-to-night variability in AHI)**

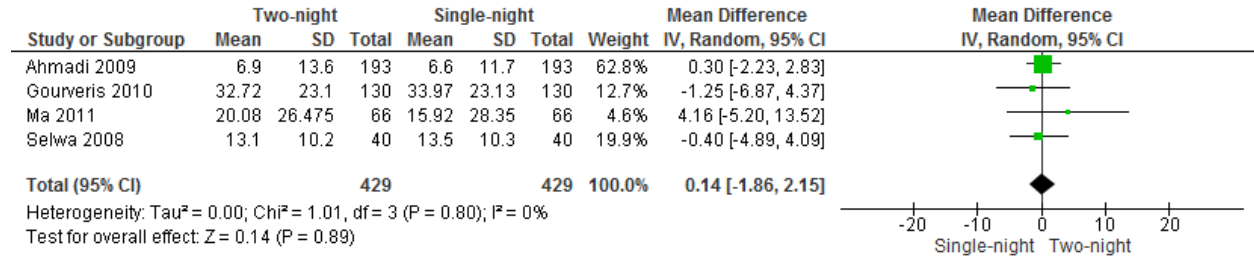

**Table S66—Summary of Findings table for Two-night PSG vs. Single-night PSG for the improvement in clinical outcomes of Adults suspected of OSA**

**References:** Ahmadi 2009 (A); Gourveris 2010 (B); Ma 2011 (C); Selwa 2008 (D)

**Patient or population:** Adults suspected of OSA  
**Setting:** Attended in-lab  
**Intervention:** Two-night PSG  
**Comparison:** Single-night PSG

| Outcomes | Quality of the evidence (GRADE) | Anticipated absolute effects <sup>†</sup> (95% CI)<br>Single-night PSG vs. second-night PSG                             | № of participants (studies)    |
|----------|---------------------------------|-------------------------------------------------------------------------------------------------------------------------|--------------------------------|
| AHI      | ⊕⊕⊕⊕<br>HIGH                    | The mean difference in AHI (variability) was 0.14 events/h lower (-1.86 greater to 2.15 lower) with a single-night PSG. | 858<br>(4 RCTs) <sup>A-D</sup> |
